# Supplementary material for: Chiral multifunctional thiourea-phosphine catalyzed asymmetric [3 + 2] annulation of Morita–Baylis–Hillman carbonates with maleimides
Source: publisher site journal article supplement (doi:10.3762/bjoc.8.121), 2012-07-16
Supplement: Additional file 1 [file 1860-5397-8-121-S1.pdf]

# Supporting Information

for

## Chiral multifunctional thiourea-phosphine catalyzed asymmetric [3 + 2] annulation of Morita–Baylis–Hillman carbonates with maleimides

Hong-Ping Deng<sup>1</sup>, De Wang<sup>2</sup>, Yin Wei<sup>1</sup> and Min Shi<sup>\*1,2,§</sup>

Address: <sup>1</sup>State Key Laboratory of Organometallic Chemistry, Shanghai Institute of Organic Chemistry, Chinese Academy of Sciences, 354 Fenglin Road, Shanghai 200032, People's Republic of China and <sup>2</sup>Key Laboratory for Advanced Materials and Institute of Fine Chemicals, School of Chemistry & Molecular Engineering, East China University of Science and Technology, and 130 MeiLong Road, Shanghai 200237, People's Republic of China

Email: Min Shi - [Mshi@mail.sioc.ac.cn](mailto:Mshi@mail.sioc.ac.cn)

<sup>§</sup>Fax: 86-21-64166128

\*Corresponding author

## Experimental procedures and characterization data of compounds given in this article

### CONTENTS

|                                                                            |     |
|----------------------------------------------------------------------------|-----|
| 1. General procedure for asymmetric [3 + 2] annulation.....                | S2  |
| 2. General procedure and spectroscopic data of the product <b>4c</b> ..... | S56 |
| 3. <sup>31</sup> P NMR Spectroscopy of the control experiments.....        | S60 |
| 4. References.....                                                         | S62 |

## General remarks:

Melting points were determined on a digital melting point apparatus and temperatures were uncorrected. Optical rotations were determined at 589 nm (sodium D line) by using a Perkin-Elmer-341 MC digital polarimeter;  $[\alpha]_D$ -values are given in units of  $10 \text{ deg}^{-1} \text{ cm}^2 \text{ g}^{-1}$ .  $^1\text{H}$  NMR spectra were recorded on a Bruker AM-300 and AM-400 spectrometer for solution in  $\text{CDCl}_3$  with tetramethylsilane (TMS) as an internal standard; coupling constants  $J$  are given in Hertz.  $^{13}\text{C}$  NMR spectra were recorded on a Bruker AM-300 and AM-400 spectrophotometers (75 or 100 MHz) with complete proton decoupling spectrophotometers ( $\text{CDCl}_3$ : 77.0 ppm).  $^{31}\text{P}$  NMR spectra were recorded on a Bruker AM-400 spectrophotometers (161.9 MHz) for solution in  $\text{CDCl}_3$  with 85%  $\text{H}_3\text{PO}_4$  as an internal standard; infrared spectra were recorded on a Perkin-Elmer PE-983 spectrometer with absorption in  $\text{cm}^{-1}$ . Flash column chromatography was performed with 300–400 mesh silica gel. For thin-layer chromatography (TLC), silica gel plates (Huanghai GF254) were used. Chiral HPLC was performed on a SHIMADZU SPD-10A *vp* series with chiral columns (Chiralpak AD-H, OD-H, and IC-H columns  $4.6 \times 250 \text{ mm}$ , (Daicel Chemical Ind., Ltd.)) and chiral column (Phenomenex Lux  $5\mu$  Amylose-2 column  $4.6 \times 250 \text{ mm}$  (PA-2, (Phenomenex Ind., Ltd.)). Mass spectra were recorded by EI, ESI, MALDI and HRMS, measured on a HP-5989 instrument.

## 1. General procedure for asymmetric [3 + 2] annulation.

Catalyst **TP** was synthesized according to the literature [1], and its yield, characterization and spectra are provided in [1].

### *General Procedure for Asymmetric [3 + 2] Annulation:*

Under an argon atmosphere, a mixture of maleimide **1** (0.2 mmol), MBH carbonate **2** (0.2 mmol) and catalyst **TP** (0.02 mmol, 11 mg) in toluene (1.0 mL) was stirred at room temperature for 24–48 h. Then the solvent was removed under reduced pressure, and the residue was chromatographed on silica gel (elution with petroleum ether/EtOAc 10:1–4:1) to provide compound **3**.

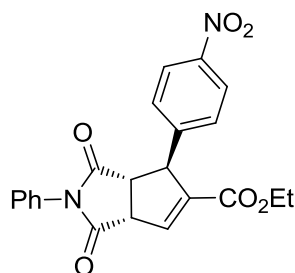

**(3aR,4S,6aS)-ethyl 4-(4-nitrophenyl)-1,3-dioxo-2-phenyl-1,2,3,3a,4,6a-hexahydro-cyclopenta[c]pyrrole-5-carboxylate (3a).** Yield: 30 mg, 74%; yellow oil; IR (CH<sub>2</sub>Cl<sub>2</sub>):  $\nu$  3076, 2981, 1779, 1716, 1635, 1597, 1519, 1496, 1456, 1348, 1273, 1181, 1089, 1053, 1014, 988, 889, 852, 814, 769, 752, 734, 692, 661 cm<sup>-1</sup>; <sup>1</sup>H NMR (400 MHz, CDCl<sub>3</sub>, TMS):  $\delta$  1.19 (3H, t,  $J$  = 7.2 Hz, CH<sub>3</sub>), 3.52 (1H, dd,  $J$  = 2.4, 7.2 Hz, CH), 4.06–4.18 (2H, m, CH<sub>2</sub>), 4.34–4.38 (1H, m, CH), 4.77 (1H, d,  $J$  = 1.2 Hz, CH), 7.06 (1H, dd,  $J$  = 1.6, 2.4 Hz, CH), 7.28–7.30 (2H, m, ArH), 7.40–7.44 (3H, m, ArH), 7.47–7.51 (2H, m, ArH), 8.22 (2H, d,  $J$  = 8.8 Hz, ArH); <sup>13</sup>C NMR (100 MHz, CDCl<sub>3</sub>, TMS):  $\delta$  13.9, 52.2, 52.9, 53.2, 61.3, 124.3, 126.3, 128.0, 129.0, 131.2, 138.6, 140.8, 147.3, 148.9, 162.4, 173.7, 176.3; MS (ESI)  $m/z$  (%): 407.0 (100) [M<sup>+</sup> + 1]; HRMS (ESI) Calcd. for C<sub>22</sub>H<sub>18</sub>N<sub>2</sub>NaO<sub>6</sub> (M<sup>+</sup> + Na) requires 429.1057, found: 429.1062; Enantiomeric excess was determined by HPLC with a Chiralcel IC-H column [ $\lambda$  = 214 nm; eluent: hexane/isopropanol 50/50; flow rate: 0.7 mL/min;  $t_{\text{major}}$  = 28.13 min,  $t_{\text{minor}}$  = 38.19 min; ee = 96%; [ $\alpha$ ]<sub>D</sub><sup>20</sup> = +383.9 ( $c$  1.0, CHCl<sub>3</sub>)].

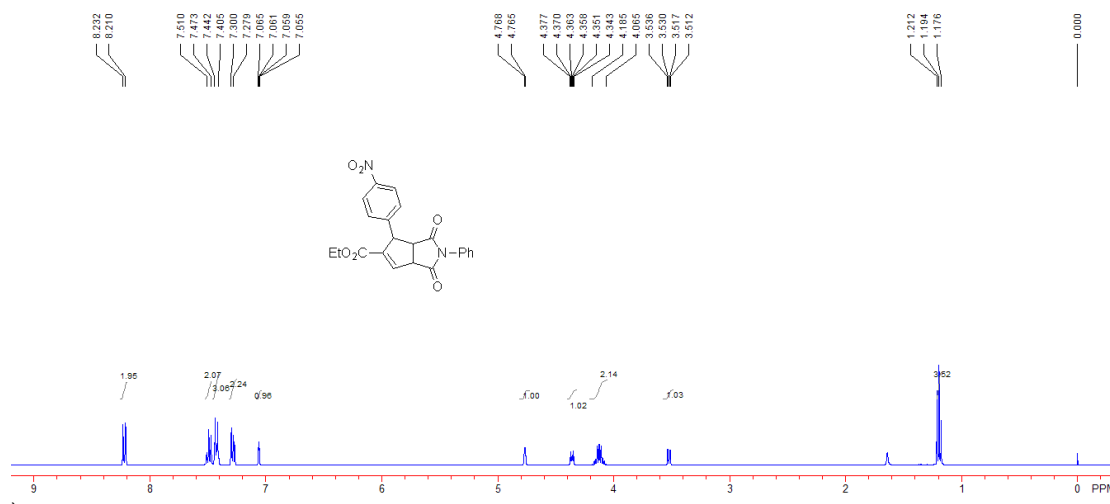

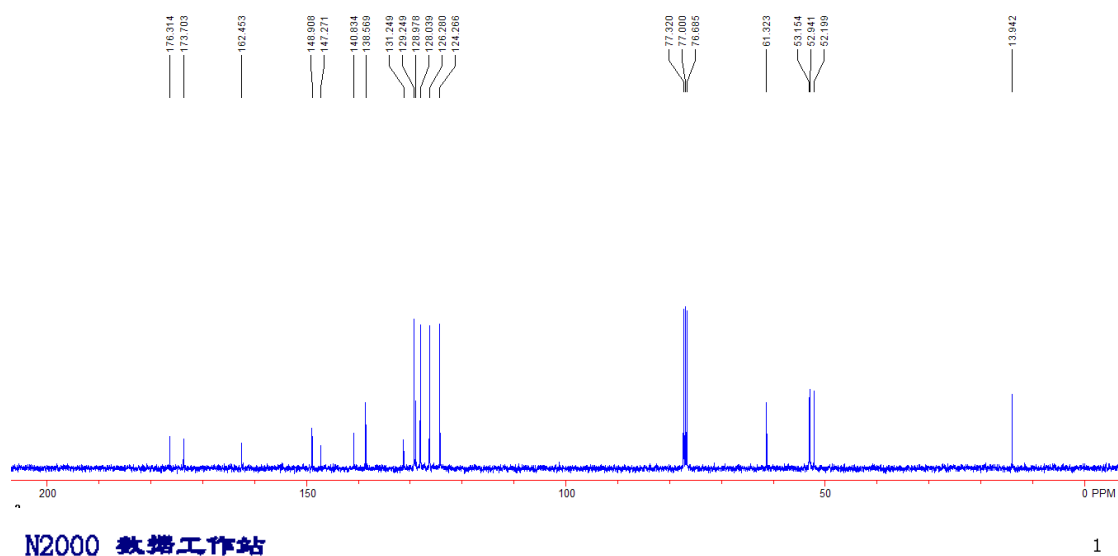

实验时间: 2011-07-11, 16:06:09  
谱图文件: E:\实验数据\HPLC\dhp\dhp-17-24-IC-50-50-0.7-214-rac.org

实验者:  
报告时间: 2011-11-18, 21:53:10  
积分方法: 面积归一法

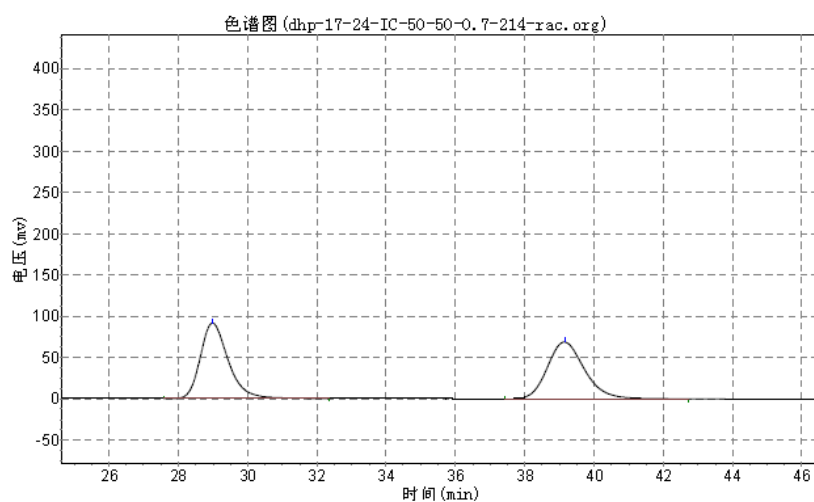

分析结果表

| 峰号 | 峰名 | 保留时间   | 峰高         | 峰面积          | 含量       |
|----|----|--------|------------|--------------|----------|
| 1  |    | 28.998 | 91347.523  | 5141725.500  | 49.9864  |
| 2  |    | 39.165 | 68916.156  | 5144520.500  | 50.0136  |
| 总计 |    |        | 160263.680 | 10286246.000 | 100.0000 |

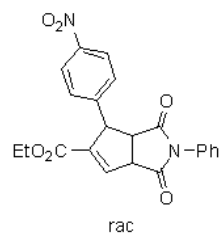

IC-H, 214 nm  
Hexane: iPrOH = 50:50  
0.7 mL/min

实验时间: 2011-07-14, 17:13:46  
谱图文件: E:\实验数据\HPLC\dhp\dhp-17-45-IC-50-50-0.7-214-asy.org

实验者:  
报告时间: 2011-11-18, 21:54:09  
积分方法: 面积归一法

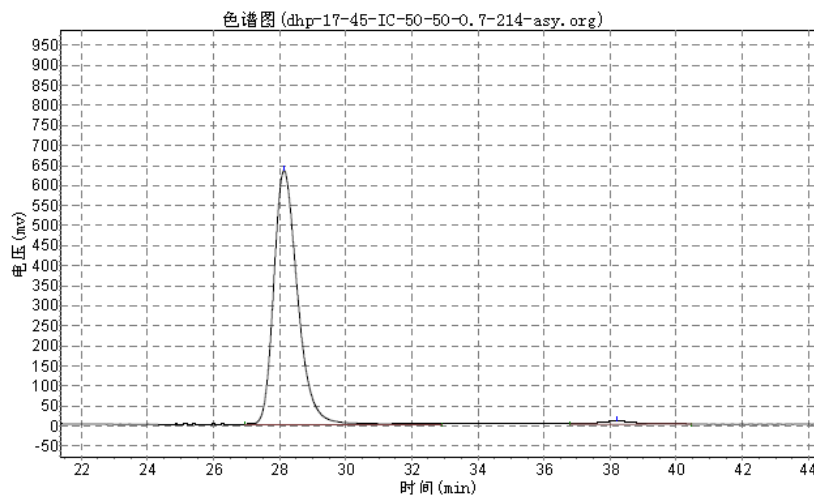

分析结果表

| 峰号 | 峰名 | 保留时间   | 峰高         | 峰面积          | 含量       |
|----|----|--------|------------|--------------|----------|
| 1  |    | 28.130 | 633080.813 | 31597968.000 | 98.1329  |
| 2  |    | 38.193 | 8477.035   | 601178.625   | 1.8671   |
| 总计 |    |        | 641557.848 | 32199146.625 | 100.0000 |

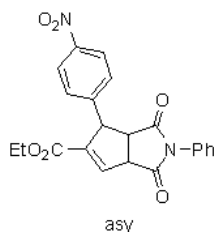

IC-H, 214 nm  
Hexane: iPrOH = 50:50  
0.7 mL/min

Chiral HPLC report: Enantiomeric excess was determined by HPLC with a Chiralcel IC-H column [ $\lambda = 214$  nm; eluent: hexane/isopropanol 50/50; flow rate: 0.7 mL/min;  $t_{\text{major}} = 28.13$  min,  $t_{\text{minor}} = 38.19$  min; ee = 96%;  $[\alpha]_{\text{D}}^{20} = +338.9$  (c 1.0,  $\text{CHCl}_3$ )].

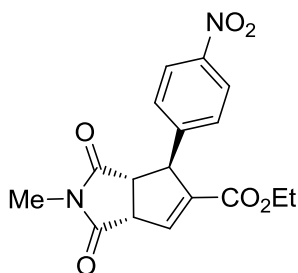

(3aR,4S,6aS)-ethyl 2-methyl-4-(4-nitrophenyl)-1,3-dioxo-1,2,3,3a,4,6a-hexahydrocyclopenta[c]pyrrole-5-carboxylate (3b). Yield: 34 mg, 99%; yellow oil; IR ( $\text{CH}_2\text{Cl}_2$ ):  $\nu$  2983, 1782,

1704, 1635, 1597, 1519, 1494, 1434, 134, 1273, 1203, 1096, 1045, 1014, 1000, 959, 894, 852, 814, 792, 755, 736, 700, 659 cm<sup>-1</sup>; <sup>1</sup>H NMR (300 MHz, CDCl<sub>3</sub>, TMS): δ 1.18 (3H, t, *J* = 7.2 Hz, CH<sub>3</sub>), 3.03 (3H, s, CH<sub>3</sub>), 3.36 (1H, dd, *J* = 2.1, 7.2 Hz, CH), 4.02–4.17 (2H, m, CH<sub>2</sub>), 4.20–4.25 (1H, m, CH), 4.64 (1H, d, *J* = 1.2 Hz, CH), 6.98–6.99 (1H, m, CH), 7.40 (2H, d, *J* = 9.0 Hz, ArH), 8.21 (2H, d, *J* = 9.0 Hz, ArH); <sup>13</sup>C NMR (75 MHz, CDCl<sub>3</sub>, TMS): δ 13.9, 25.2, 52.1, 52.7, 52.9, 61.2, 124.0, 128.0, 138.6, 140.4, 147.2, 149.1, 162.4, 174.8, 177.3; MS (ESI) *m/z* (%): 345.0 (100) [M<sup>+</sup> + 1]; HRMS (ESI) Calcd. for C<sub>17</sub>H<sub>16</sub>N<sub>2</sub>NaO<sub>6</sub> (M<sup>+</sup> + Na) requires 367.0901, found: 367.0893; Enantiomeric excess was determined by HPLC with a Chiralcel IC-H column [λ = 214 nm; eluent: hexane/isopropanol 50/50; Flow rate: 0.7 mL/min; *t*<sub>major</sub> = 39.74 min, *t*<sub>minor</sub> = 46.57 min; ee = 98%; [α]<sub>D</sub><sup>20</sup> = +282.8 (c 1.0, CHCl<sub>3</sub>).

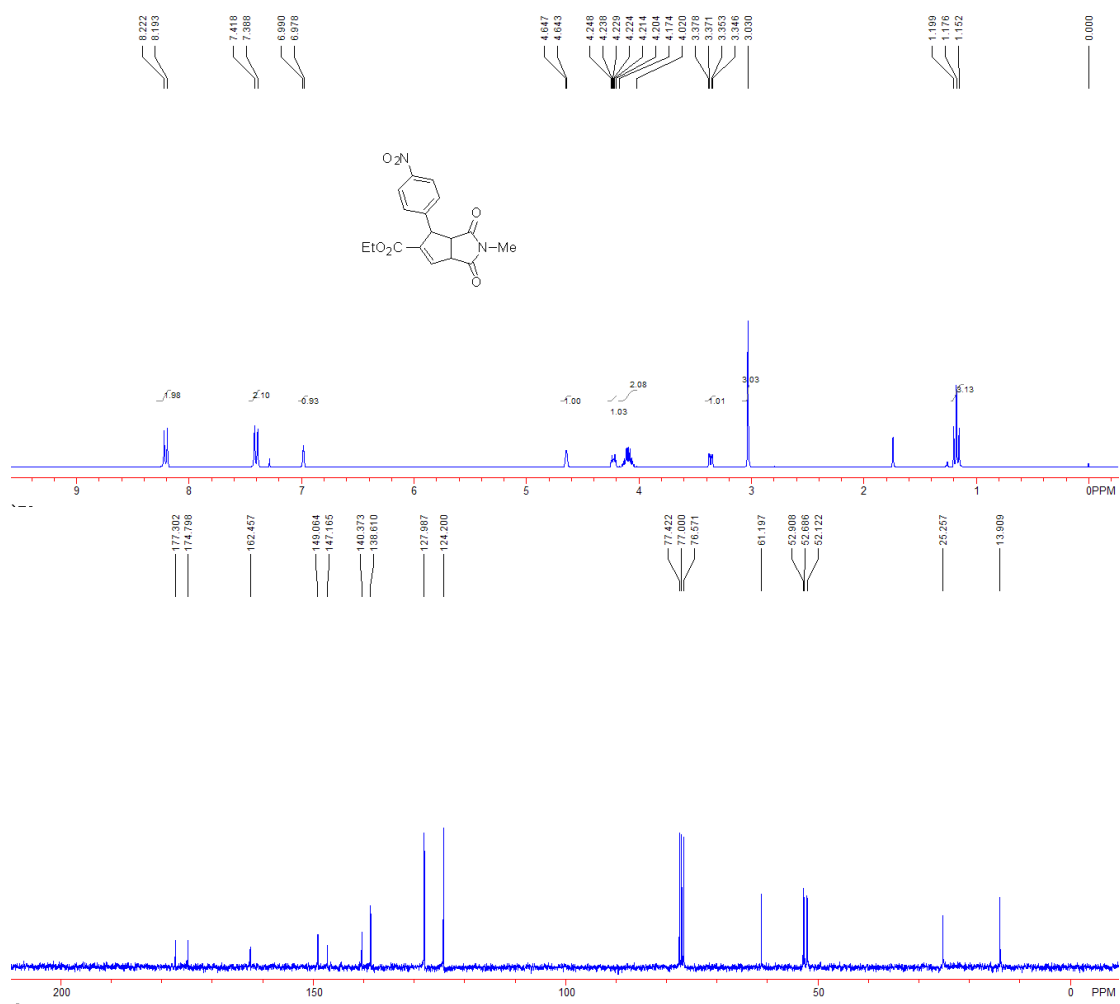

实验时间: 2011-08-17, 16:23:31

谱图文件: E:\实验数据\HPLC\dhp\dhp-17-73-1-N-Me-IC-50-50-0.7-214-rac.org

实验者:

报告时间: 2011-11-18, 21:46:17

积分方法: 面积归一法

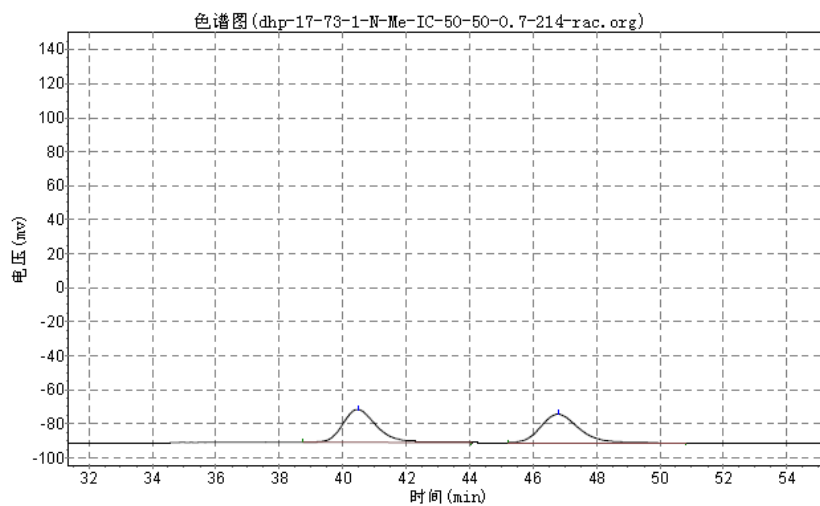

分析结果表

| 峰号 | 峰名 | 保留时间   | 峰高        | 峰面积         | 含量       |
|----|----|--------|-----------|-------------|----------|
| 1  |    | 40.498 | 19236.787 | 1412594.375 | 50.7159  |
| 2  |    | 46.798 | 16573.801 | 1372712.250 | 49.2841  |
| 总计 |    |        | 35810.588 | 2785306.625 | 100.0000 |

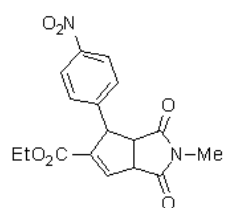

rac

IC-H, 214 nm  
Hexane:PrOH = 50:50  
0.7 mL/min

实验时间: 2011-08-17, 17:26:10

谱图文件: E:\实验数据\HPLC\dhp\dhp-17-73-1-N-Me-IC-50-50-0.7-214-asy.org

实验者:

报告时间: 2011-11-18, 21:48:57

积分方法: 面积归一法

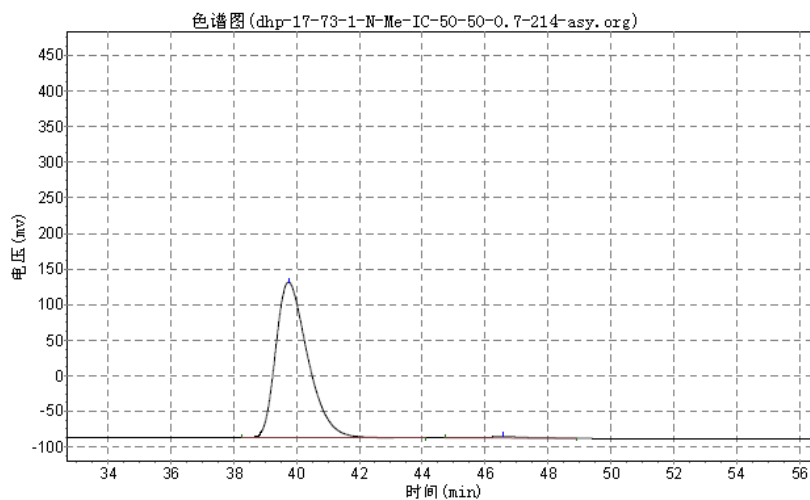

| 分析结果表 |    |        |            |              |          |
|-------|----|--------|------------|--------------|----------|
| 峰号    | 峰名 | 保留时间   | 峰高         | 峰面积          | 含量       |
| 1     |    | 39.743 | 218998.922 | 15517876.000 | 99.0861  |
| 2     |    | 46.575 | 1748.814   | 143119.609   | 0.9139   |
| 总计    |    |        | 220747.736 | 15660995.609 | 100.0000 |

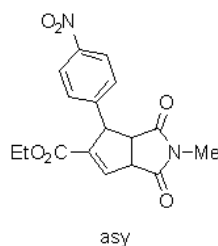

IC-H, 214 nm  
Hexane: iPrOH = 50:50  
0.7 mL/min

Chiral HPLC Report: Enantiomeric excess was determined by HPLC with a Chiralcel IC-H column [ $\lambda = 214$  nm; eluent: hexane/isopropanol 50/50; flow rate: 0.7 mL/min;  $t_{\text{major}} = 39.74$  min,  $t_{\text{minor}} = 46.57$  min; ee = 98%;  $[\alpha]_{\text{D}}^{20} = +282.8$  (c 1.0,  $\text{CHCl}_3$ )].

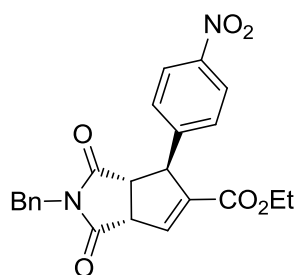

(3aR,4S,6aS)-ethyl 2-benzyl-4-(4-nitrophenyl)-1,3-dioxo-1,2,3,3a,4,6a-hexahydrocyclopenta[c]pyrrole-5-carboxylate (3c). Yield: 36 mg, 86%; yellow oil; IR ( $\text{CH}_2\text{Cl}_2$ ):  $\nu$  3077, 3033,



2981, 2936, 1776, 1708, 1635, 1604, 1558, 1455, 1431, 1393, 1348, 1271, 1202, 1169, 1095, 1054, 1014, 991, 931, 905, 851, 814, 753, 714, 699, 660  $\text{cm}^{-1}$ ;  $^1\text{H}$  NMR (400 MHz,  $\text{CDCl}_3$ , TMS):  $\delta$  1.16 (3H, t,  $J = 7.2$  Hz,  $\text{CH}_3$ ), 3.34 (1H, dd,  $J = 2.4, 7.2$  Hz, CH), 4.04–4.13 (2H, m,  $\text{CH}_2$ ), 4.18–4.21 (1H, m, CH), 4.62–4.70 (3H, m,  $\text{CH}_2 + \text{CH}$ ), 6.97 (1H, s, CH), 7.26–7.38 (7H, m, ArH), 8.18–8.20 (2H, m, ArH);  $^{13}\text{C}$  NMR (100 MHz,  $\text{CDCl}_3$ , TMS):  $\delta$  13.9, 42.8, 52.2, 52.7, 52.9, 61.2, 124.2, 127.9, 128.2, 128.72, 128.75, 135.1, 138.6, 140.4, 147.2, 149.1, 162.4, 174.4, 176.9; MS (ESI)  $m/z$  (%): 421.1 (100)  $[\text{M}^+ + 1]$ ; HRMS (ESI) Calcd. for  $\text{C}_{23}\text{H}_{20}\text{N}_2\text{NaO}_6$  ( $\text{M}^+ + \text{Na}$ ) requires 443.1214, found: 443.1198; Enantiomeric excess was determined by HPLC with a Chiralcel IC-H column [ $\lambda = 214$  nm; eluent: hexane/isopropanol 50/50; flow rate: 0.7 mL/min;  $t_{\text{major}} = 29.77$  min,  $t_{\text{minor}} = 33.60$  min; ee = 94%;  $[\alpha]_{\text{D}}^{20} = +243.3$  ( $c$  1.0,  $\text{CHCl}_3$ )].

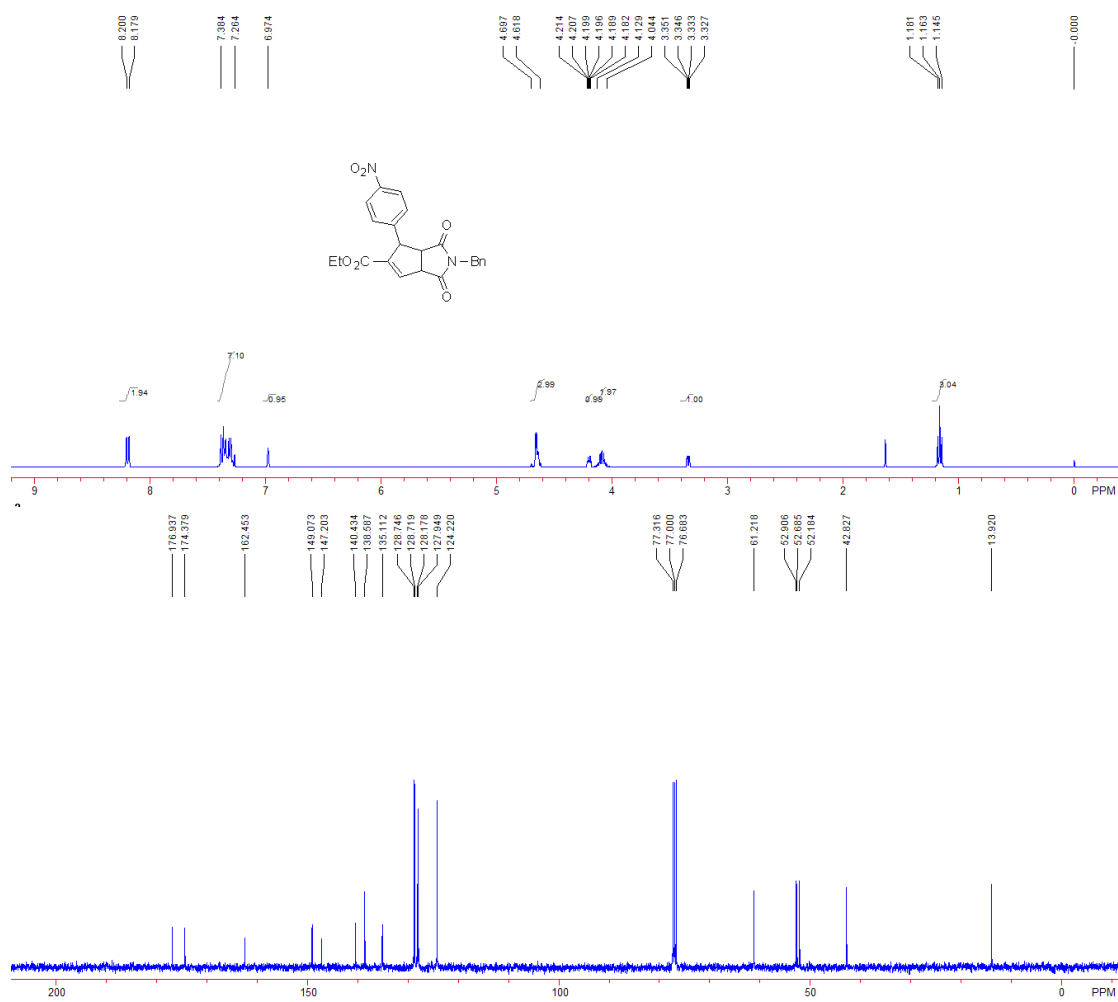

实验时间: 2011-07-21, 23:15:38  
谱图文件:E:\实验数据\HPLC\dhp\dhp-17-59-IC-50-50-0.7-214-  
rac.org

实验者:  
报告时间: 2011-11-18, 21:54:45  
积分方法: 面积归一法

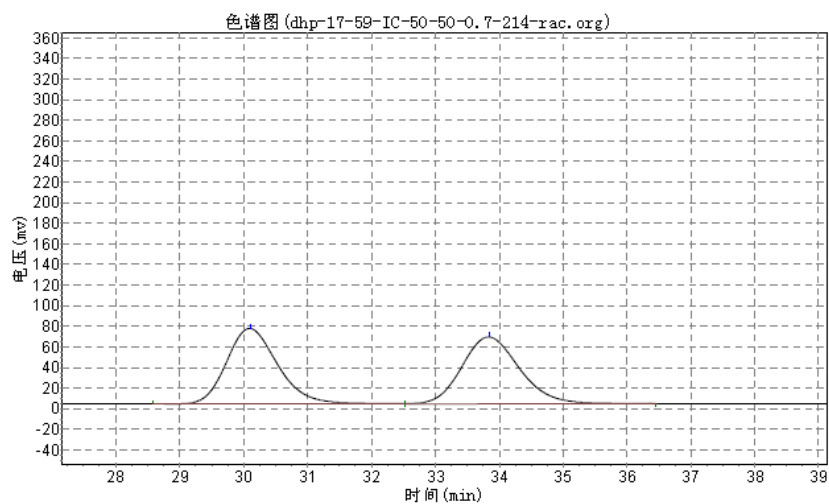

分析结果表

| 峰号 | 峰名 | 保留时间   | 峰高         | 峰面积         | 含量       |
|----|----|--------|------------|-------------|----------|
| 1  |    | 30.123 | 73285.547  | 4081439.000 | 50.1095  |
| 2  |    | 33.857 | 64830.836  | 4063593.750 | 49.8905  |
| 总计 |    |        | 138116.383 | 8145032.750 | 100.0000 |

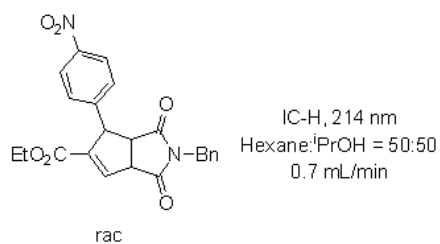

实验时间: 2011-07-21, 22:28:06  
谱图文件: E:\实验数据\HPLC\dhp\17-59-IC-50-50-0.7-214-asy.org

实验者:  
报告时间: 2011-11-18, 21:55:47  
积分方法: 面积归一法

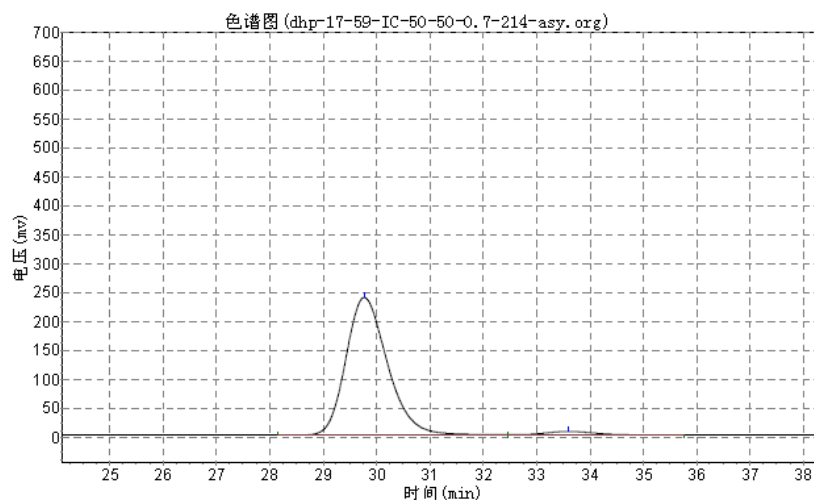

| 分析结果表 |    |        |            |              |          |
|-------|----|--------|------------|--------------|----------|
| 峰号    | 峰名 | 保留时间   | 峰高         | 峰面积          | 含量       |
| 1     |    | 29.773 | 237640.906 | 12853007.000 | 96.9194  |
| 2     |    | 33.605 | 6289.451   | 408535.344   | 3.0806   |
| 总计    |    |        | 243930.357 | 13261542.344 | 100.0000 |

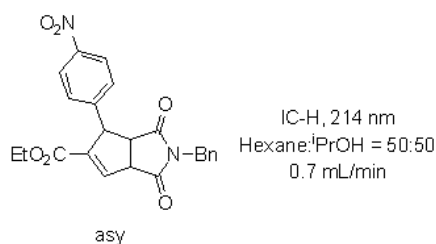

Chiral HPLC report: Enantiomeric excess was determined by HPLC with a Chiralcel IC-H column [ $\lambda = 214$  nm; eluent: hexane/isopropanol 50/50; flow rate: 0.7 mL/min;  $t_{\text{major}} = 29.77$  min,  $t_{\text{minor}} = 33.60$  min; ee = 94%;  $[\alpha]_{\text{D}}^{20} = +243.3$  (c 1.0,  $\text{CHCl}_3$ )].

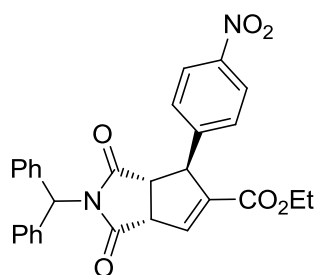

(3aR,4S,6aS)-ethyl 2-benzhydryl-4-(4-nitrophenyl)-1,3-dioxo-1,2,3,3a,4,6a-hexahydrocyclopenta[c]pyrrole-5-carboxylate (3d). Yield: 50 mg, >99%; yellow oil; IR ( $\text{CH}_2\text{Cl}_2$ ):  $\nu$  3064, 3030,

2924, 2853, 1776, 1712, 1634, 1598, 1520, 1495, 1449, 1348, 1272, 1190, 1170, 1094, 1031, 1014, 988, 920, 895, 853, 810, 738, 699, 663  $\text{cm}^{-1}$ ;  $^1\text{H}$  NMR (300 MHz,  $\text{CDCl}_3$ , TMS):  $\delta$  1.18 (3H, t,  $J = 7.2$  Hz,  $\text{CH}_3$ ), 3.36 (1H, dd,  $J = 2.1, 7.8$  Hz, CH), 4.06–4.16 (2H, m,  $\text{CH}_2$ ), 4.19–4.23 (1H, m, CH), 4.68 (1H, d,  $J = 1.2$  Hz, CH), 6.52 (1H, s, CH), 7.00 (1H, d,  $J = 1.2$  Hz, CH), 7.23–7.28 (4H, m, ArH), 7.31–7.38 (8H, m, ArH), 8.17–8.20 (2H, m, ArH);  $^{13}\text{C}$  NMR (75 MHz,  $\text{CDCl}_3$ , TMS):  $\delta$  13.9, 52.0, 52.8, 52.9, 58.7, 61.2, 124.2, 127.9, 128.0, 128.2, 128.42, 128.46, 128.5, 136.8, 136.9, 138.8, 140.5, 147.2, 149.0, 162.5, 174.2, 176.9; MS (ESI)  $m/z$  (%): 497.0 (100)  $[\text{M}^+ + 1]$ ; HRMS (ESI) Calcd. for  $\text{C}_{29}\text{H}_{24}\text{N}_2\text{NaO}_6$  ( $\text{M}^+ + \text{Na}$ ) requires 519.1527, found: 519.1507; Enantiomeric excess was determined by HPLC with a Chiralcel IC-H column [ $\lambda = 214$  nm; eluent: hexane/isopropanol 50/50; flow rate: 0.7 mL/min;  $t_{\text{major}} = 16.59$  min,  $t_{\text{minor}} = 21.27$  min; ee = 98%;  $[\alpha]_{\text{D}}^{20} = +271.7$  ( $c$  1.0,  $\text{CHCl}_3$ )].

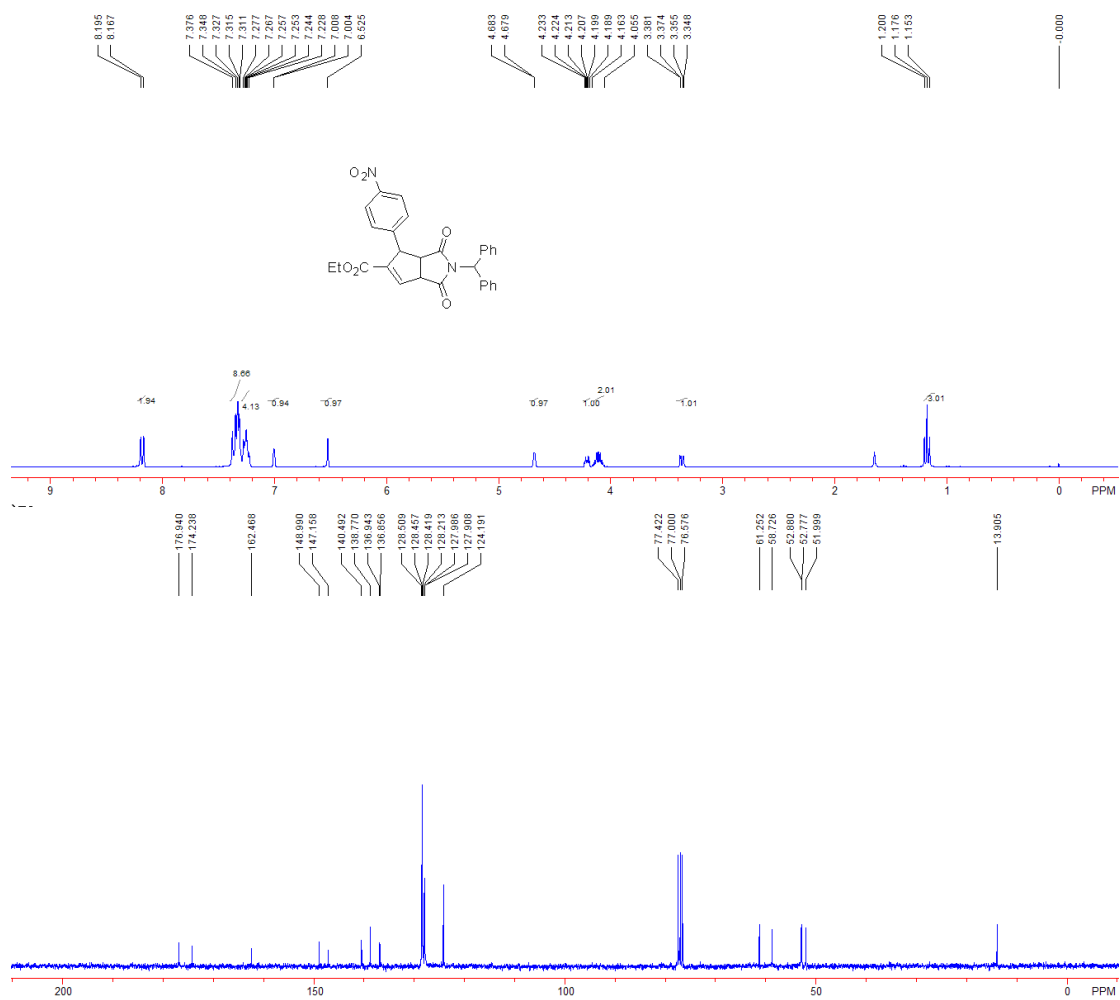

实验时间: 2011-08-17, 21:03:56

谱图文件:E:\实验数据\HPLC\dhp-17-73-2-N-CHPh2-IC-50-50-0.7-214-rac.org

实验者:

报告时间: 2011-11-18, 21:50:25

积分方法: 面积归一法

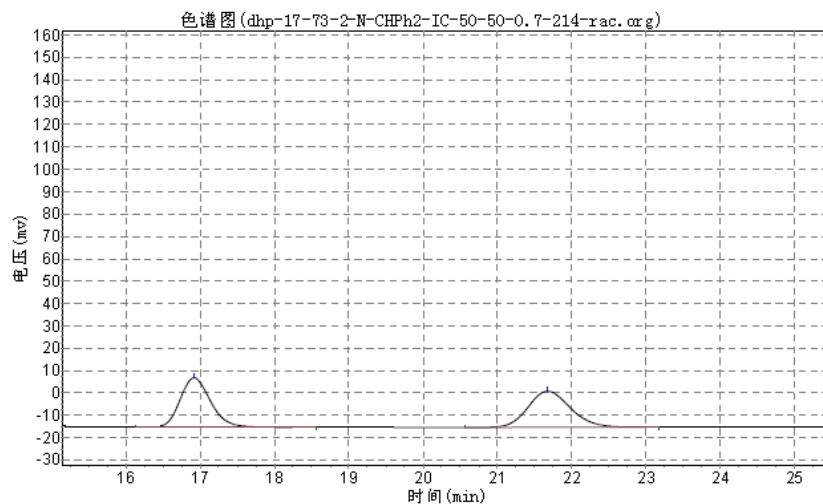

分析结果表

| 峰号 | 峰名 | 保留时间   | 峰高        | 峰面积         | 含量       |
|----|----|--------|-----------|-------------|----------|
| 1  |    | 16.918 | 22167.262 | 637809.063  | 49.5466  |
| 2  |    | 21.677 | 16221.405 | 649481.438  | 50.4534  |
| 总计 |    |        | 38388.667 | 1287290.500 | 100.0000 |

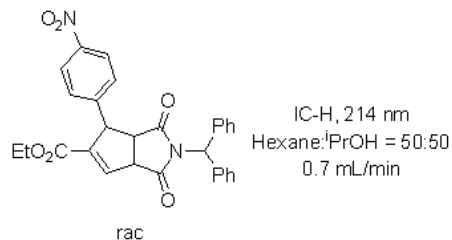

实验时间: 2011-08-17, 21:54:52

谱图文件: E:\实验数据\HPLC\dhp\dhp-17-73-2-N-CHPh2-IC-50-50-0.7-214-asy.org

实验者:

报告时间: 2011-11-18, 21:52:10

积分方法: 面积归一法

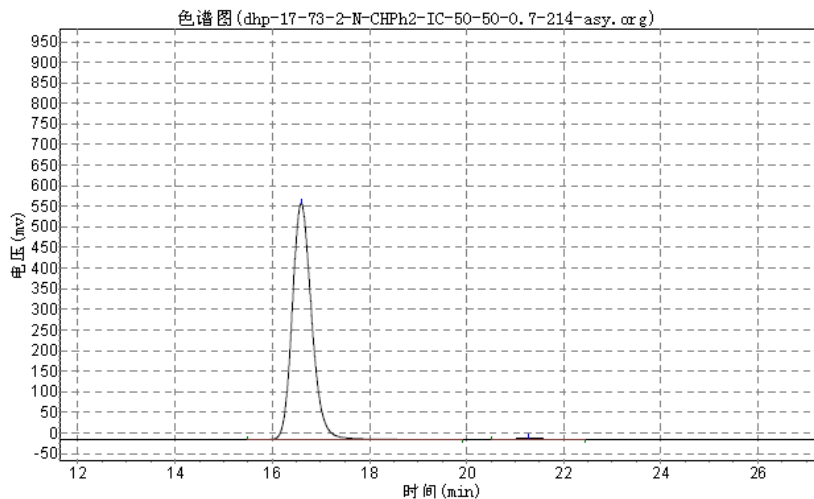

分析结果表

| 峰号 | 峰名 | 保留时间   | 峰高         | 峰面积          | 含量       |
|----|----|--------|------------|--------------|----------|
| 1  |    | 16.593 | 573381.438 | 15920479.000 | 99.1817  |
| 2  |    | 21.275 | 3427.888   | 131353.188   | 0.8183   |
| 总计 |    |        | 576809.325 | 16051832.188 | 100.0000 |

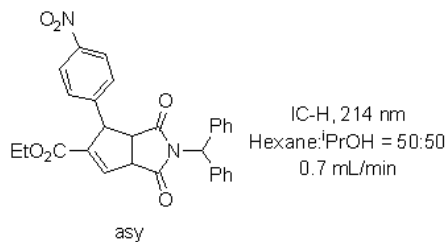

Chiral HPLC report: Enantiomeric excess was determined by HPLC with a Chiralcel IC-H column [ $\lambda = 214$  nm; eluent: hexane/isopropanol 50/50; flow rate: 0.7 mL/min;  $t_{\text{major}} = 16.59$  min,  $t_{\text{minor}} = 21.27$  min; ee = 98%;  $[\alpha]_D^{20} = +271.7$  (c 1.0, CHCl<sub>3</sub>)].

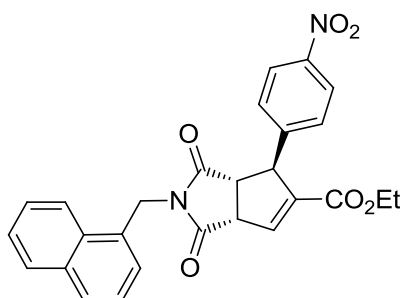

**(3a*R*,4*S*,6a*S*)-ethyl 2-(naphthalen-1-ylmethyl)-4-(4-nitrophenyl)-1,3-dioxo-1,2,3,3a,4,6a-hexahydrocyclopenta[*c*]pyrrole-5-carboxylate (3e).** Yield: 43 mg, 91%; yellow oil; IR (CH<sub>2</sub>Cl<sub>2</sub>):  $\nu$  2981, 2920, 1777, 1708, 1635, 1598, 1519, 1428, 1394, 1347, 1271, 1174, 1096, 1014, 990, 852, 792, 778, 736, 699 cm<sup>-1</sup>; <sup>1</sup>H NMR (300 MHz, CDCl<sub>3</sub>, TMS):  $\delta$  1.16 (3H, t, *J* = 6.9 Hz, CH<sub>3</sub>), 3.30 (1H, dd, *J* = 1.8, 7.2 Hz, CH), 4.03–4.19 (3H, m, CH+CH<sub>2</sub>), 4.65 (1H, d, *J* = 1.8 Hz, CH), 5.12 (2H, s, CH<sub>2</sub>), 6.98 (1H, dd, *J* = 1.8, 2.7 Hz, CH), 7.33–7.36 (2H, m, ArH), 7.42 (1H, d, *J* = 7.5 Hz, ArH), 7.46–7.58 (3H, m, ArH), 7.78–7.86 (2H, m, ArH), 8.16 (2H, d, *J* = 8.7 Hz, ArH), 8.23 (1H, d, *J* = 8.1 Hz, ArH); <sup>13</sup>C NMR (75 MHz, CDCl<sub>3</sub>, TMS):  $\delta$  13.9, 40.6, 52.0, 52.6, 52.8, 61.2, 123.2, 124.2, 125.1, 125.9, 126.6, 127.9, 128.7, 129.0, 130.1, 131.1, 133.7, 138.6, 140.4, 147.1, 149.0, 162.4, 174.5, 177.2; MS (ESI) *m/z* (%): 471.0 (100) [M<sup>+</sup> + 1]; HRMS (ESI) Calcd. for C<sub>27</sub>H<sub>22</sub>N<sub>2</sub>NaO<sub>6</sub> (M<sup>+</sup> + Na) requires 493.1370, found: 493.1363; Enantiomeric excess was determined by HPLC with a Chiralcel PC-2 column [ $\lambda$  = 214 nm; eluent: hexane/isopropanol 50/50; flow rate: 0.7 mL/min; *t*<sub>major</sub> = 34.85 min, *t*<sub>minor</sub> = 83.52 min; ee = 96%; [ $\alpha$ ]<sub>D</sub><sup>20</sup> = +204.5 (*c* 1.0, CHCl<sub>3</sub>)].

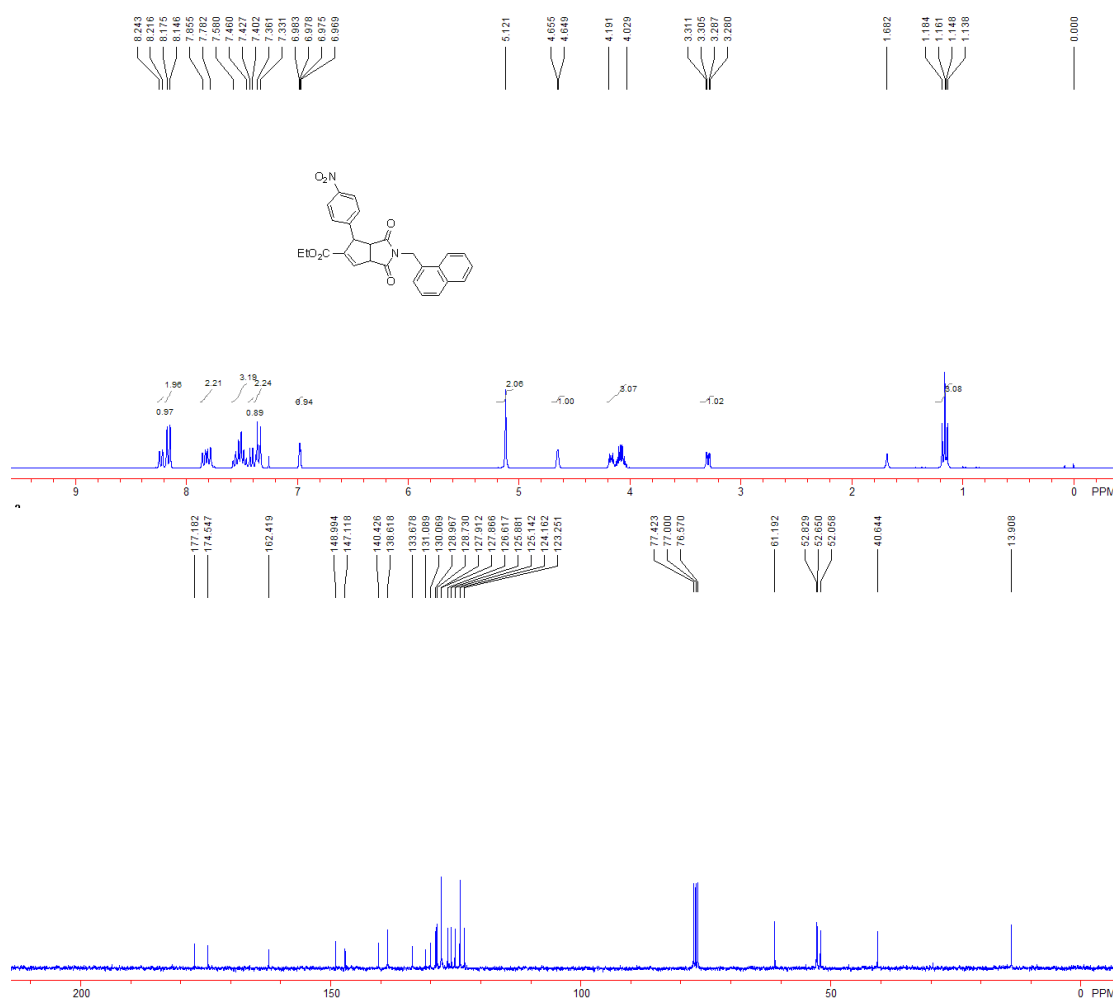

**192 DHP-17-72-3+- PC-2 55 214 0.7**

|                  |                               |                   |          |
|------------------|-------------------------------|-------------------|----------|
| Sample Name:     | DHP-17-72-3+- PC-2 55 214 0.7 | Injection Volume: | 5.0      |
| Vial Number:     | RA1                           | Channel:          | UV_VIS_1 |
| Sample Type:     | unknown                       | Wavelength:       | 214      |
| Control Program: | WXL                           | Bandwidth:        | n.a.     |
| Quantif. Method: | WXL                           | Dilution Factor:  | 1.0000   |
| Recording Time:  | 2011-8-19 11:02               | Sample Weight:    | 1.0000   |
| Run Time (min):  | 116.57                        | Sample Amount:    | 1.0000   |

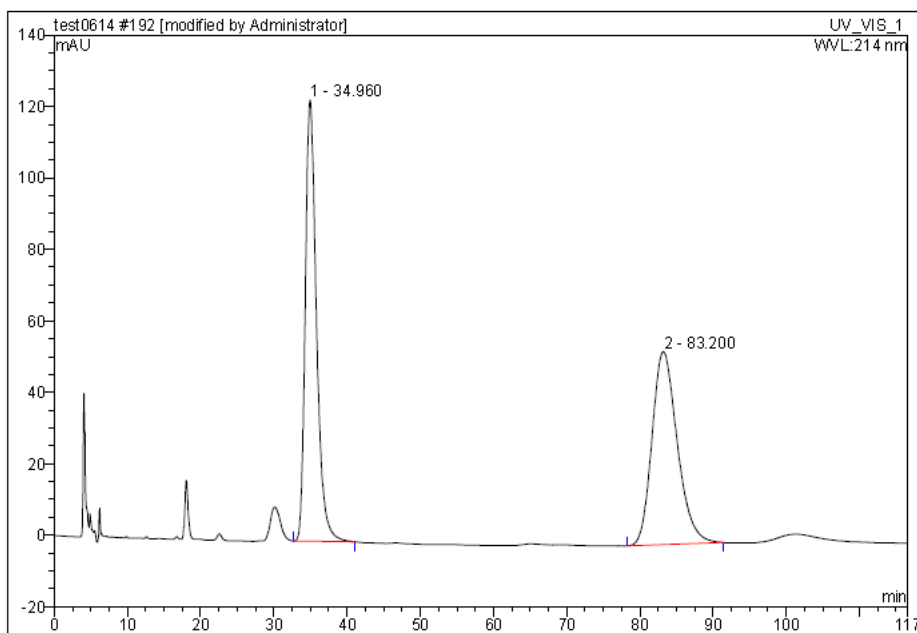

| No.           | Ret.Time<br>min | Peak Name | Height<br>mAU | Area<br>mAU*min | Rel.Area<br>% | Amount | Type |
|---------------|-----------------|-----------|---------------|-----------------|---------------|--------|------|
| 1             | 34.96           | n.a.      | 123.529       | 217.480         | 50.18         | n.a.   | BMB  |
| 2             | 83.20           | n.a.      | 54.025        | 215.933         | 49.82         | n.a.   | BMB  |
| <b>Total:</b> |                 |           | 177.554       | 433.413         | 100.00        | 0.000  |      |

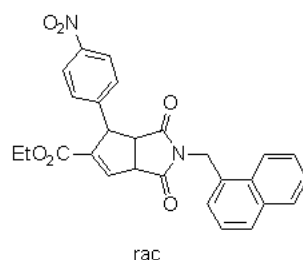

PC-2, 214 nm  
Hexane:PrOH = 50:50  
0.7 mL/min



**193 DHP-17-72-3**

|                  |                        |                   |                 |
|------------------|------------------------|-------------------|-----------------|
| Sample Name:     | <b>DHP-17-72-3</b>     | Injection Volume: | <b>5.0</b>      |
| Vial Number:     | <b>RA2</b>             | Channel:          | <b>UV_VIS_1</b> |
| Sample Type:     | <b>unknown</b>         | Wavelength:       | <b>214</b>      |
| Control Program: | <b>WXL</b>             | Bandwidth:        | <b>n.a.</b>     |
| Quantif. Method: | <b>WXL</b>             | Dilution Factor:  | <b>1.0000</b>   |
| Recording Time:  | <b>2011-8-19 13:00</b> | Sample Weight:    | <b>1.0000</b>   |
| Run Time (min):  | <b>115.18</b>          | Sample Amount:    | <b>1.0000</b>   |

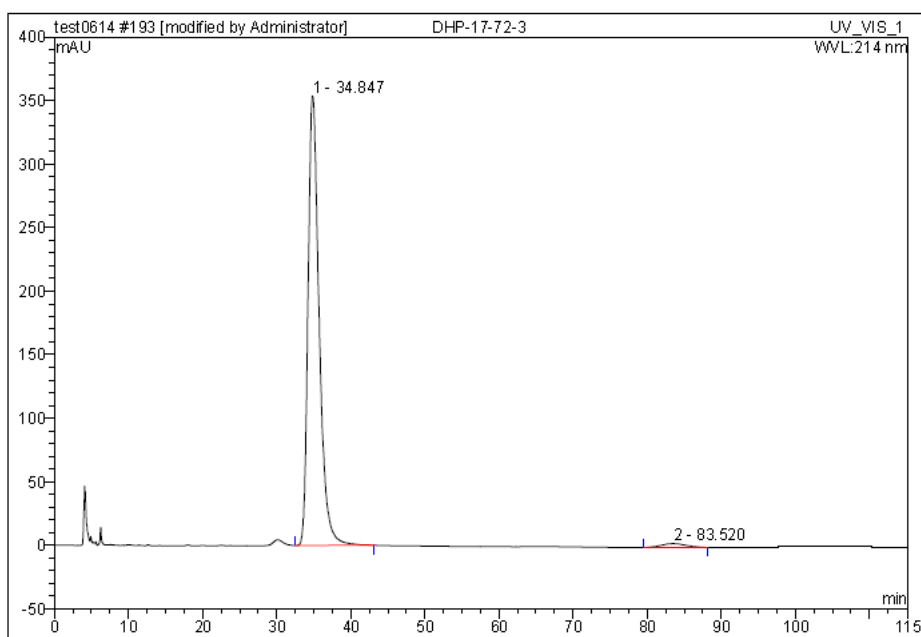

| No.           | Ret.Time<br>min | Peak Name | Height<br>mAU | Area<br>mAU*min | Rel.Area<br>% | Amount | Type |
|---------------|-----------------|-----------|---------------|-----------------|---------------|--------|------|
| 1             | 34.85           | n.a.      | 353.746       | 613.639         | 98.18         | n.a.   | BMB* |
| 2             | 83.52           | n.a.      | 3.027         | 11.382          | 1.82          | n.a.   | BMB* |
| <b>Total:</b> |                 |           | 356.773       | 625.022         | 100.00        | 0.000  |      |

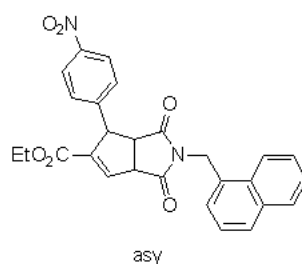

PC-2, 214 nm  
Hexane: iPrOH = 50:50  
0.7 mL/min

default/Integration

Chromeleon (c) Dionex 1996-2006  
Version 6.80 SR10 Build 2818 (166959)

Chiral HPLC report: Enantiomeric excess was determined by HPLC with a Chiralcel PC-2 column  
[ $\lambda = 214$  nm; eluent: hexane/isopropanol 50/50; flow rate: 0.7 mL/min;  $t_{\text{major}} = 34.85$  min,  $t_{\text{minor}} = 83.52$  min; ee = 96%;  $[\alpha]_{\text{D}}^{20} = +204.5$  (c 1.0,  $\text{CHCl}_3$ )].

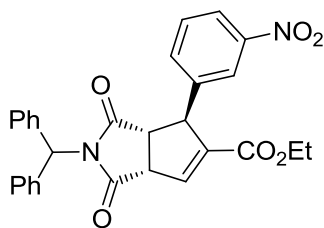

**(3aR,4S,6aS)-ethyl 2-benzhydryl-4-(3-nitrophenyl)-1,3-dioxo-1,2,3,3a,4,6a-hexahydrocyclopenta[c]pyrrole-5-carboxylate (3f).** Yield: 43 mg, 87%; yellow oil; IR (CH<sub>2</sub>Cl<sub>2</sub>):  $\nu$  3064, 3030, 2981, 2931, 1777, 1712, 1633, 1600, 1584, 1530, 1496, 1477, 1449, 1352, 1271, 1190, 1171, 1095, 1031, 989, 892, 873, 858, 808, 737, 700 cm<sup>-1</sup>; <sup>1</sup>H NMR (300 MHz, CDCl<sub>3</sub>, TMS):  $\delta$  1.18 (3H, t,  $J$  = 6.9 Hz, CH<sub>3</sub>), 3.39 (1H, dd,  $J$  = 2.4, 7.5 Hz, CH), 4.06–4.17 (2H, m, CH<sub>2</sub>), 4.23–4.27 (1H, m, CH), 4.69 (1H, d,  $J$  = 0.9 Hz, CH), 6.52 (1H, s, CH), 7.01 (1H, d,  $J$  = 0.9 Hz, CH), 7.23–7.35 (10H, m, ArH), 7.49–7.54 (1H, m, ArH), 7.59 (1H, d,  $J$  = 7.5 Hz, ArH), 8.00 (1H, s, ArH), 8.12 (1H, d,  $J$  = 8.1 Hz, ArH); <sup>13</sup>C NMR (75 MHz, CDCl<sub>3</sub>, TMS):  $\delta$  13.9, 52.1, 52.8, 58.8, 61.2, 121.6, 122.6, 128.0, 128.4, 128.5, 129.9, 133.6, 136.9, 138.8, 140.5, 143.8, 148.6, 162.5, 174.2, 177.0; MS (ESI)  $m/z$  (%): 497.0 (100) [M<sup>+</sup> + 1]; HRMS (ESI) Calcd. for C<sub>29</sub>H<sub>24</sub>N<sub>2</sub>NaO<sub>6</sub> (M<sup>+</sup> + Na) requires 519.1527, found: 519.1509; Enantiomeric excess was determined by HPLC with a Chiralcel IC-H column [ $\lambda$  = 214 nm; eluent: hexane/isopropanol 80/20; flow rate: 0.7 mL/min;  $t_{\text{major}}$  = 38.82 min,  $t_{\text{minor}}$  = 60.56 min; ee = 94%;  $[\alpha]_{\text{D}}^{20}$  = +248.7 ( $c$  1.0, CHCl<sub>3</sub>)].

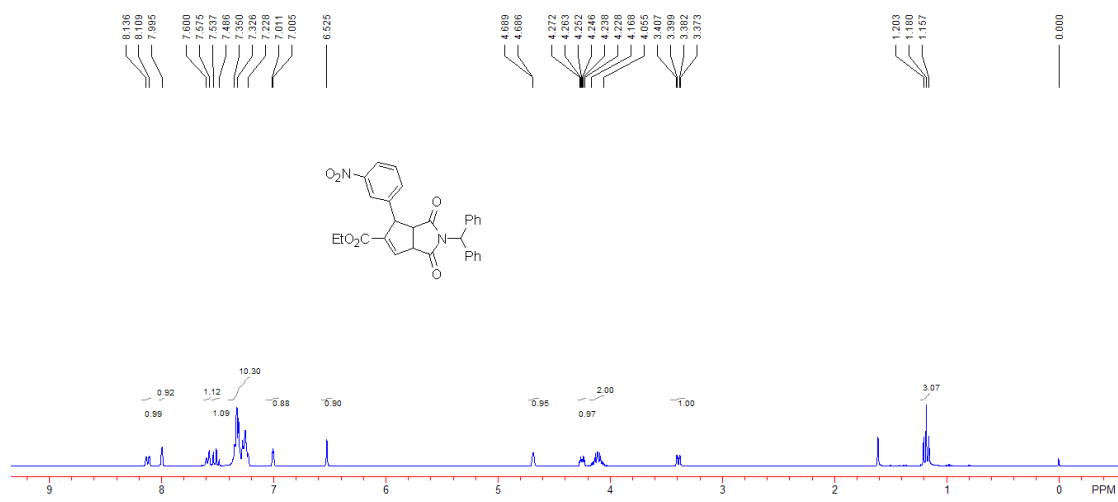

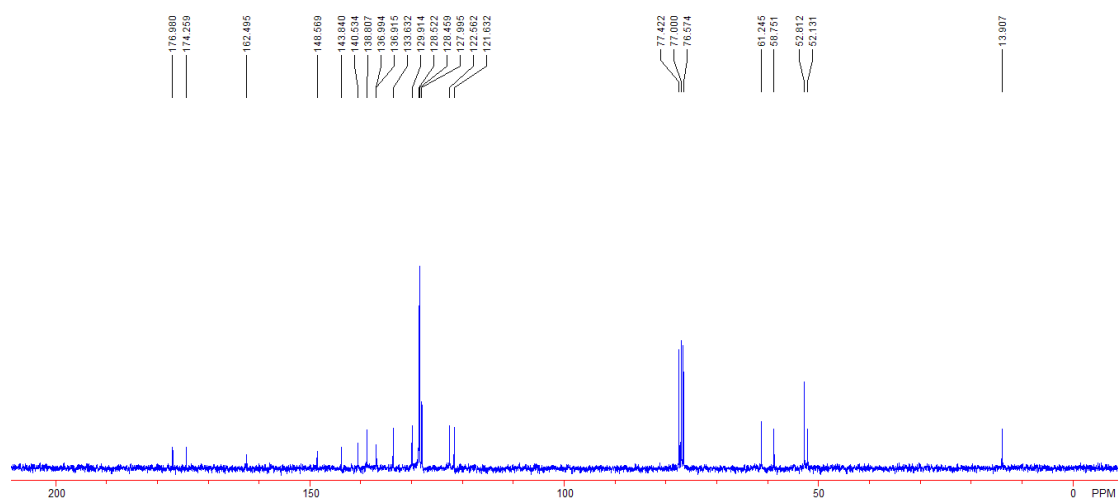

N2000 数据工作站

1

实验时间: 2011-08-22, 12:05:38  
谱图文件: E:\实验数据\HPLC\dhp-17-77-N-CHPh2-IC-80-20-0.7-214-rac.org

实验者:  
报告时间: 2011-11-18, 21:57:43  
积分方法: 面积归一法

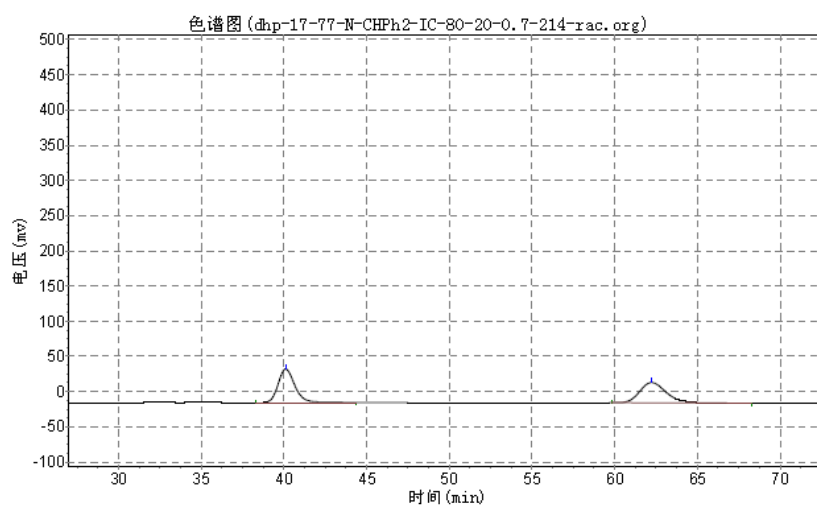

分析结果表

| 峰号 | 峰名 | 保留时间   | 峰高        | 峰面积         | 含量       |
|----|----|--------|-----------|-------------|----------|
| 1  |    | 40.108 | 47517.902 | 3314779.000 | 50.6086  |
| 2  |    | 62.227 | 28911.902 | 3235059.500 | 49.3914  |
| 总计 |    |        | 76429.805 | 6549838.500 | 100.0000 |

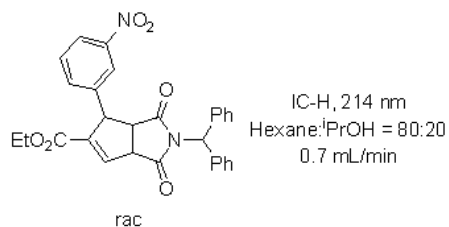

实验时间: 2011-08-22, 13:34:22  
谱图文件: E:\实验数据\HPLC\dhp-17-77-N-CHPh2-IC-80-20-0.7-214-asy.org

实验者:  
报告时间: 2011-11-18, 21:59:13  
积分方法: 面积归一法

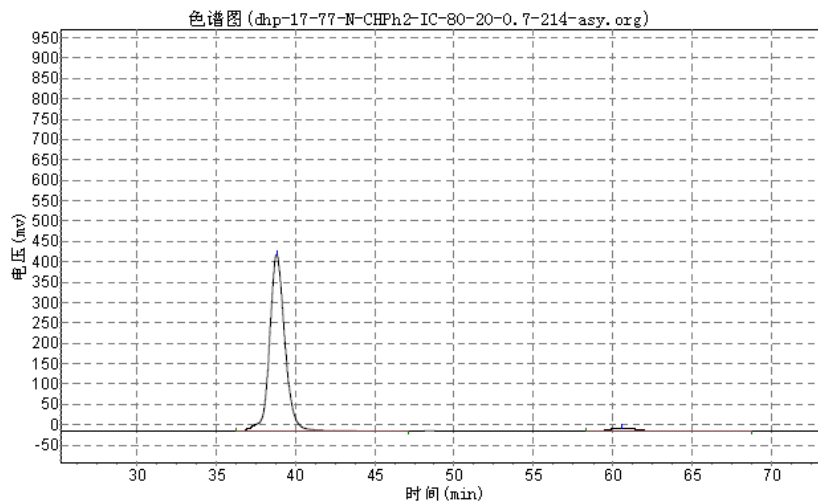

分析结果表

| 峰号 | 峰名 | 保留时间   | 峰高         | 峰面积          | 含量       |
|----|----|--------|------------|--------------|----------|
| 1  |    | 38.817 | 432819.719 | 28980274.000 | 96.9618  |
| 2  |    | 60.562 | 7944.897   | 908075.500   | 3.0382   |
| 总计 |    |        | 440764.616 | 29888349.500 | 100.0000 |

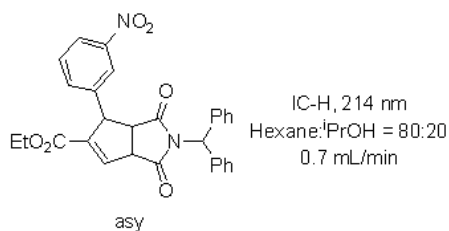

Chiral HPLC report: Enantiomeric excess was determined by HPLC with a Chiralcel IC-H column [ $\lambda = 214$  nm; eluent: hexane/isopropanol 80/20; flow rate: 0.7 mL/min;  $t_{\text{major}} = 38.82$  min,  $t_{\text{minor}} = 60.56$  min; ee = 94%;  $[\alpha]_{\text{D}}^{20} = +248.7$  ( $c$  1.0,  $\text{CHCl}_3$ )].

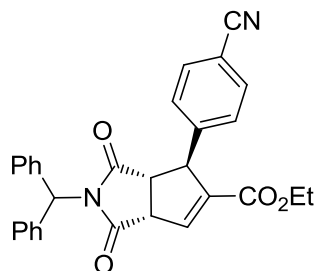

**(3a*R*,4*S*,6a*S*)-ethyl 2-benzhydryl-4-(4-cyanophenyl)-1,3-dioxo-1,2,3,3a,4,6a-hexahydrocyclopenta[*c*]pyrrole-5-carboxylate (3g).** Yield: 40 mg, 84%; colorless oil; IR (CH<sub>2</sub>Cl<sub>2</sub>):  $\nu$  3030, 2982, 2228, 1776, 1712, 1634, 1607, 1496, 1449, 1348, 1355, 1327, 1271, 1189, 1170, 1094, 1019, 987, 919, 843, 807, 739, 700 cm<sup>-1</sup>; <sup>1</sup>H NMR (300 MHz, CDCl<sub>3</sub>, TMS):  $\delta$  1.17 (3H, t, *J* = 7.2 Hz, CH<sub>3</sub>), 3.34 (1H, dd, *J* = 2.4, 7.5 Hz, CH), 4.05–4.20 (3H, m, CH+CH<sub>2</sub>), 4.62 (1H, s, CH), 6.52 (1H, s, CH), 6.98 (1H, d, *J* = 1.8, 2.7 Hz, CH), 7.22–7.34 (12H, m, ArH), 7.62 (2H, d, *J* = 8.1 Hz, ArH); <sup>13</sup>C NMR (75 MHz, CDCl<sub>3</sub>, TMS):  $\delta$  13.9, 52.0, 52.8, 53.1, 58.7, 61.2, 114.4, 118.4, 127.8, 128.0, 128.4, 128.5, 132.7, 136.9, 137.0, 138.6, 140.5, 147.0, 162.4, 174.3, 177.0; MS (ESI) *m/z* (%): 477.0 (100) [*M*<sup>+</sup>+1]; HRMS (ESI) Calcd. for C<sub>30</sub>H<sub>24</sub>N<sub>2</sub>NaO<sub>4</sub> (*M*<sup>+</sup> + Na) requires 499.1628, found: 499.1611; Enantiomeric excess was determined by HPLC with a Chiralcel IC-H column [ $\lambda$  = 214 nm; eluent: hexane/isopropanol 50/50; flow rate: 0.7 mL/min; *t*<sub>major</sub> = 16.50 min, *t*<sub>minor</sub> = 19.33 min; ee = 96%; [ $\alpha$ ]<sub>D</sub><sup>20</sup> = +299.1 (*c* 1.0, CHCl<sub>3</sub>)].

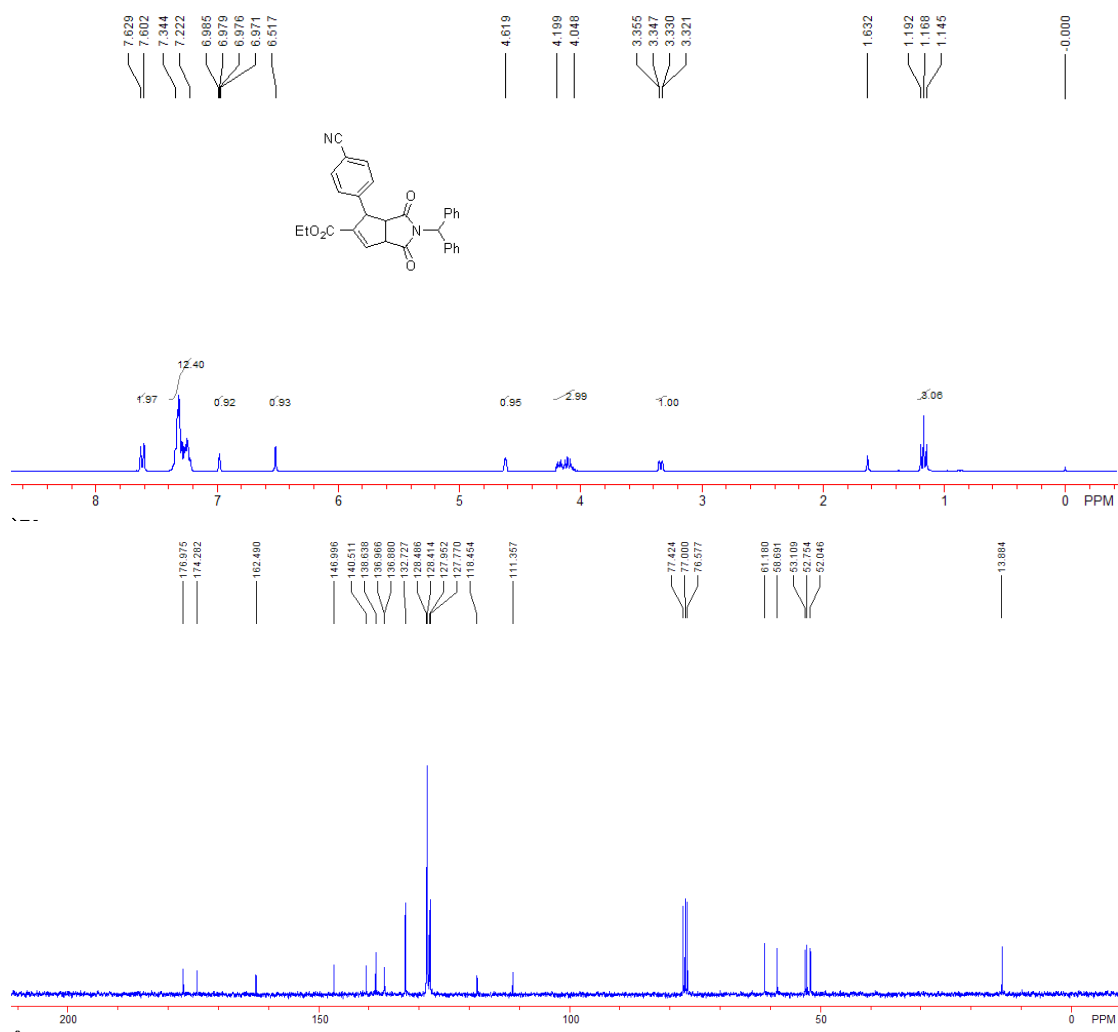

实验时间: 2011-08-21, 19:13:36  
谱图文件: E:\实验数据\HPLC\dhp\17-78-N-CHPh2-IC-50-50-0.7-214-rac.org

实验者:  
报告时间: 2011-11-18, 21:59:42  
积分方法: 面积归一法

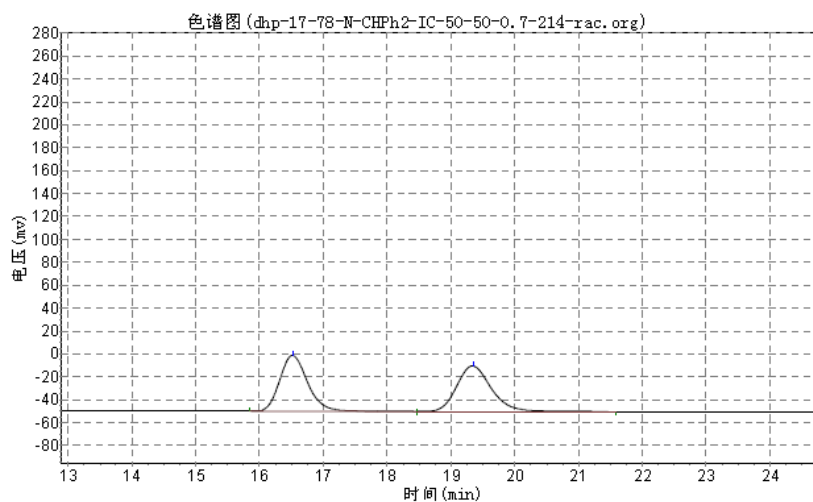

分析结果表

| 峰号 | 峰名 | 保留时间   | 峰高        | 峰面积         | 含量       |
|----|----|--------|-----------|-------------|----------|
| 1  |    | 16.523 | 48836.254 | 1495605.000 | 50.0133  |
| 2  |    | 19.357 | 39720.594 | 1494810.125 | 49.9867  |
| 总计 |    |        | 88556.848 | 2990415.125 | 100.0000 |

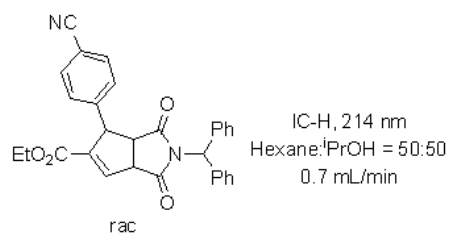

实验时间: 2011-08-21, 19:53:53  
谱图文件: E:\实验数据\HPLC\dhp\dhp-17-78-N-CHPh2-IC-50-50-0.7-214-asy.org

实验者:  
报告时间: 2011-11-18, 22:00:34  
积分方法: 面积归一法

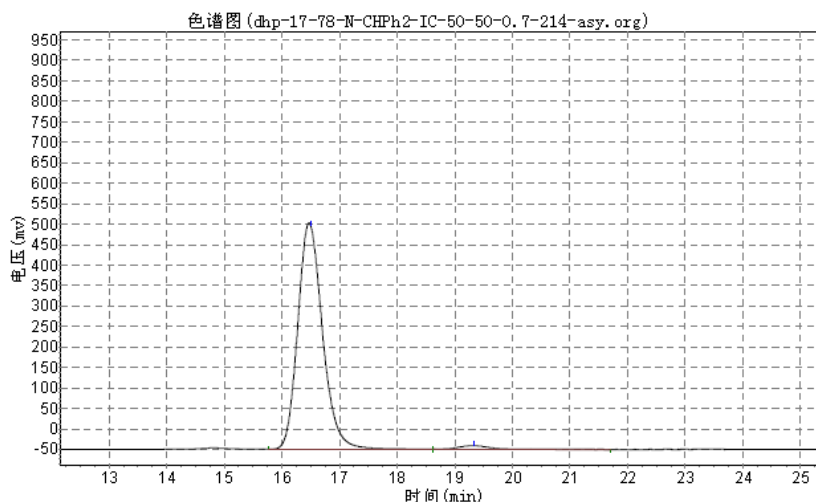

分析结果表

| 峰号 | 峰名 | 保留时间   | 峰高         | 峰面积          | 含量       |
|----|----|--------|------------|--------------|----------|
| 1  |    | 16.498 | 550996.250 | 16559629.000 | 97.8055  |
| 2  |    | 19.332 | 9099.071   | 371545.938   | 2.1944   |
| 总计 |    |        | 560095.321 | 16931174.938 | 100.0000 |

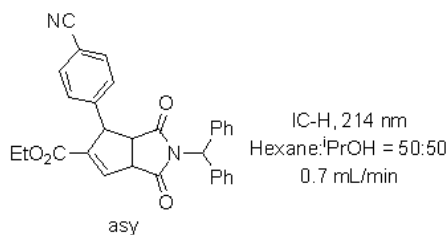

Chiral HPLC report: Enantiomeric excess was determined by HPLC with a Chiralcel IC-H column [ $\lambda = 214$  nm; eluent: hexane/isopropanol 50/50; flow rate: 0.7 mL/min;  $t_{\text{major}} = 16.50$  min,  $t_{\text{minor}} = 19.33$  min; ee = 96%;  $[\alpha]_{\text{D}}^{20} = +299.1$  ( $c$  1.0,  $\text{CHCl}_3$ )].

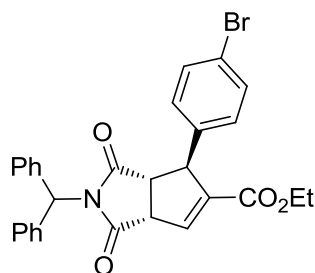

(3aR,4S,6aS)-ethyl 2-benzhydryl-4-(4-bromophenyl)-1,3-dioxo-1,2,3,3a,4,6a-hexahydrocyclopenta[c]pyrrole-5-carboxylate (3h). Yield: 39 mg, 74%; colorless oil; IR ( $\text{CH}_2\text{Cl}_2$ ):  $\nu$  3029, 2980,

1775, 1712, 1635, 1488, 1448, 1383, 1354, 1270, 1190, 1170, 1093, 1011, 987, 918, 877, 734, 698  $\text{cm}^{-1}$ ;  $^1\text{H}$  NMR (400 MHz,  $\text{CDCl}_3$ , TMS):  $\delta$  1.17 (3H, t,  $J = 7.2$  Hz,  $\text{CH}_3$ ), 3.33 (1H, d,  $J = 7.2$  Hz, CH), 4.07–4.16 (3H, m,  $\text{CH} + \text{CH}_2$ ), 4.54 (1H, s, CH), 6.51 (1H, s, CH), 6.92 (1H, s, CH), 7.05 (2H, d,  $J = 8.4$  Hz, ArH), 7.22–7.32 (10H, m, ArH), 7.43 (2H, d,  $J = 8.4$  Hz, ArH);  $^{13}\text{C}$  NMR (100 MHz,  $\text{CDCl}_3$ , TMS):  $\delta$  13.9, 52.4, 52.68, 52.75, 58.6, 61.1, 121.2, 127.9, 128.46, 128.49, 128.6, 132.0, 137.0, 137.9, 140.7, 141.2, 162.8, 174.6, 177.3; MS (ESI)  $m/z$  (%): 530.0 (100) [ $\text{M}^+ + 1$ ]; HRMS (MALDI) Calcd. for  $\text{C}_{29}\text{H}_{24}\text{NO}_4\text{BrNa}$  ( $\text{M}^+ + \text{Na}$ ) requires 552.0781, found: 552.0798; Enantiomeric excess was determined by HPLC with a Chiralcel IC-H column [ $\lambda = 214$  nm; eluent: hexane/isopropanol 50/50; flow rate: 0.7 mL/min;  $t_{\text{major}} = 9.06$  min,  $t_{\text{minor}} = 10.38$  min; ee = 97%;  $[\alpha]_{\text{D}}^{20} = +240.9$  ( $c$  1.0,  $\text{CHCl}_3$ )].

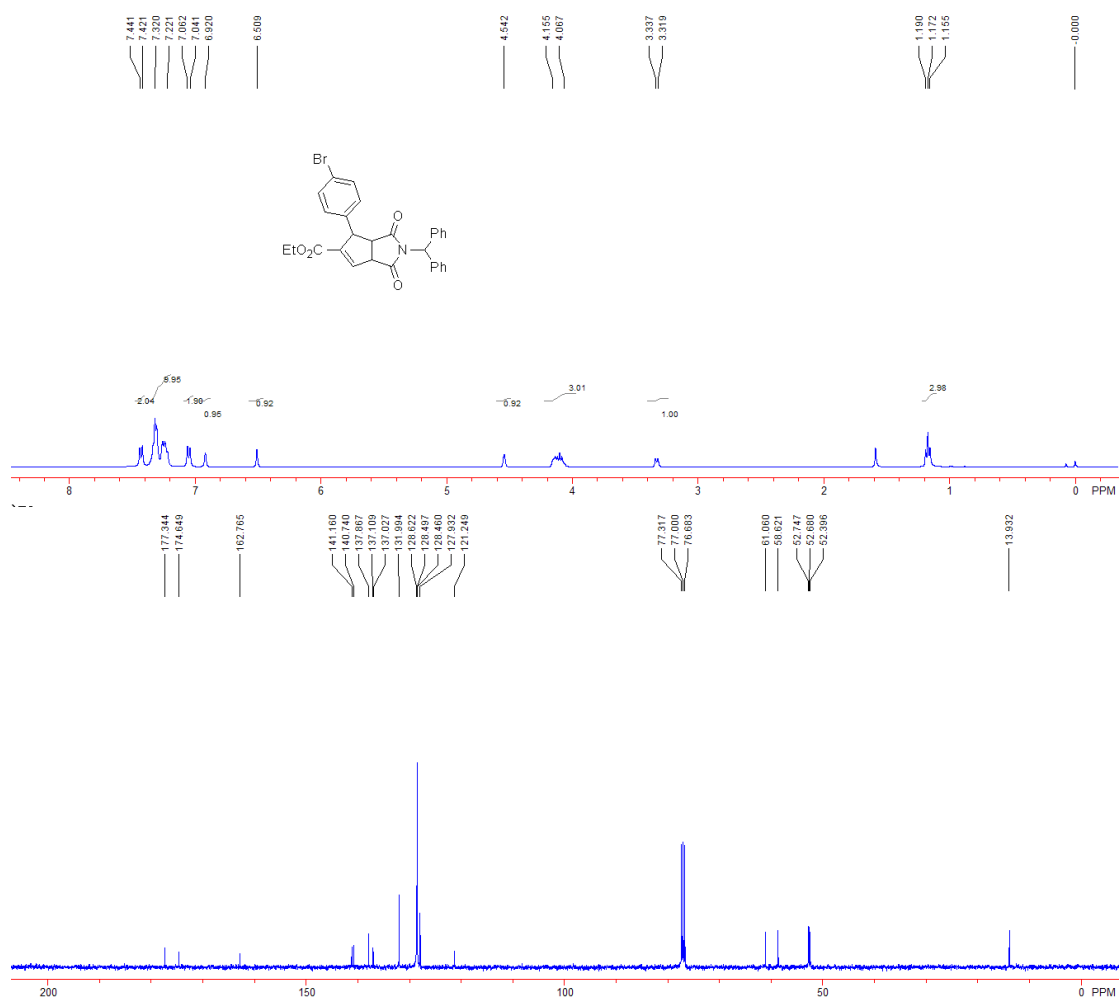



实验时间: 2011-08-29, 15:22:55

谱图文件: E:\实验数据\HPLC\dhp-17-84-N-CHPh2-IC-50-50-0.7-214-rac.org

实验者:

报告时间: 2011-11-18, 22:01:14

积分方法: 面积归一法

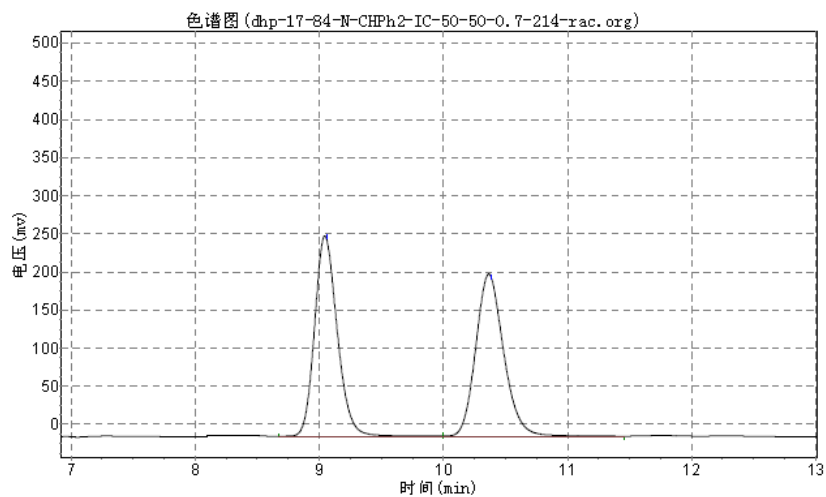

分析结果表

| 峰号 | 峰名 | 保留时间   | 峰高         | 峰面积         | 含量       |
|----|----|--------|------------|-------------|----------|
| 1  |    | 9.057  | 261156.891 | 3332328.750 | 50.0473  |
| 2  |    | 10.390 | 210492.000 | 3326024.250 | 49.9527  |
| 总计 |    |        | 471648.891 | 6658353.000 | 100.0000 |

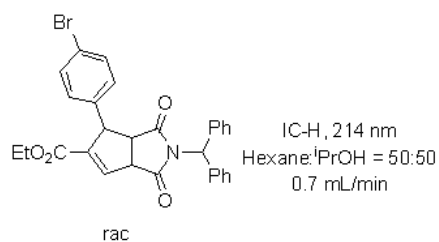

实验时间: 2011-08-29, 16:10:37  
谱图文件: E:\实验数据\HPLC\dhp\17-84-N-CHPh2-IC-50-50-0.7-214-asy.org

实验者:  
报告时间: 2011-11-18, 22:02:33  
积分方法: 面积归一法

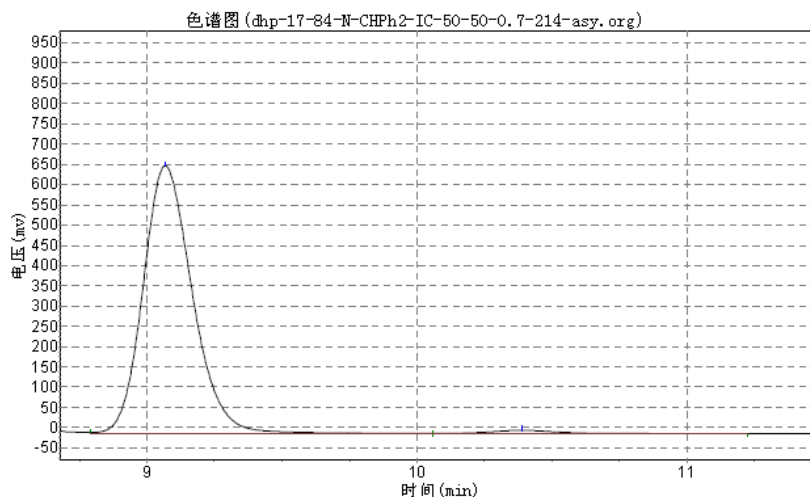

分析结果表

| 峰号 | 峰名 | 保留时间   | 峰高         | 峰面积         | 含量       |
|----|----|--------|------------|-------------|----------|
| 1  |    | 9.067  | 661049.063 | 8379444.000 | 98.4997  |
| 2  |    | 10.388 | 7945.128   | 127628.711  | 1.5003   |
| 总计 |    |        | 668994.191 | 8507072.711 | 100.0000 |

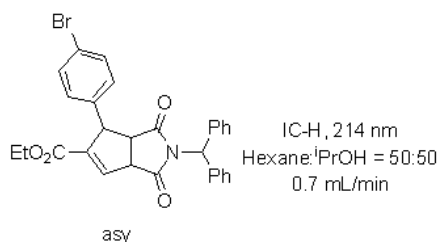

Chiral HPLC report: Enantiomeric excess was determined by HPLC with a Chiralcel IC-H column [ $\lambda = 214$  nm; eluent: hexane/isopropanol 50/50; flow rate: 0.7 mL/min;  $t_{\text{major}} = 9.06$  min,  $t_{\text{minor}} = 10.38$  min; ee = 97%;  $[\alpha]_{\text{D}}^{20} = +240.9$  (c 1.0,  $\text{CHCl}_3$ )].

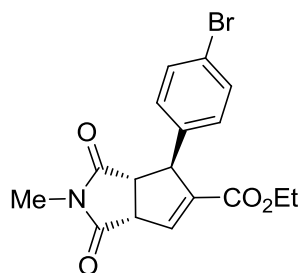

(3aR,4S,6aS)-ethyl 4-(4-bromophenyl)-2-methyl-1,3-dioxo-1,2,3,3a,4,6a-hexahydrocyclopenta[c]pyrrole-5-carboxylate (**3i**). Yield: 30 mg, 79%; colorless oil; IR ( $\text{CH}_2\text{Cl}_2$ ):  $\nu$  2981, 1781,

1714, 1653, 1634, 1558, 1540, 1521, 1506, 1488, 1433, 1409, 1378, 1327, 1272, 1202, 1127, 1095, 1071, 1011, 960, 891, 874, 828, 790, 740, 715  $\text{cm}^{-1}$ ;  $^1\text{H}$  NMR (400 MHz,  $\text{CDCl}_3$ , TMS):  $\delta$  1.17 (3H, t,  $J = 7.2$  Hz,  $\text{CH}_3$ ), 3.00 (3H, s,  $\text{CH}_3$ ), 3.32 (1H, dd,  $J = 1.6, 6.8$  Hz, CH), 4.04–4.16 (3H, m, CH+ $\text{CH}_2$ ), 4.50 (1H, s, CH), 6.89–6.90 (1H, m, CH), 7.08–7.10 (2H, m, ArH), 7.44–7.46 (2H, m, ArH);  $^{13}\text{C}$  NMR (100 MHz,  $\text{CDCl}_3$ , TMS):  $\delta$  13.9, 25.2, 52.4, 52.5, 52.9, 61.0, 121.2, 128.7, 132.0, 137.7, 140.8, 141.0, 162.7, 175.2, 177.7; MS (ESI)  $m/z$  (%): 378.0 (100) [ $\text{M}^+ + 1$ ]; HRMS (MALDI) Calcd. for  $\text{C}_{17}\text{H}_{16}\text{NO}_4\text{BrNa}$  ( $\text{M}^+ + \text{Na}$ ) requires 400.0155, found: 400.0141; Enantiomeric excess was determined by HPLC with a Chiralcel IC-H column [ $\lambda = 214$  nm; eluent: hexane/isopropanol 50/50; flow rate: 0.7 mL/min;  $t_{\text{major}} = 16.24$  min,  $t_{\text{minor}} = 17.48$  min; ee = 95%;  $[\alpha]_{\text{D}}^{20} = +239.9$  ( $c$  1.0,  $\text{CHCl}_3$ )].

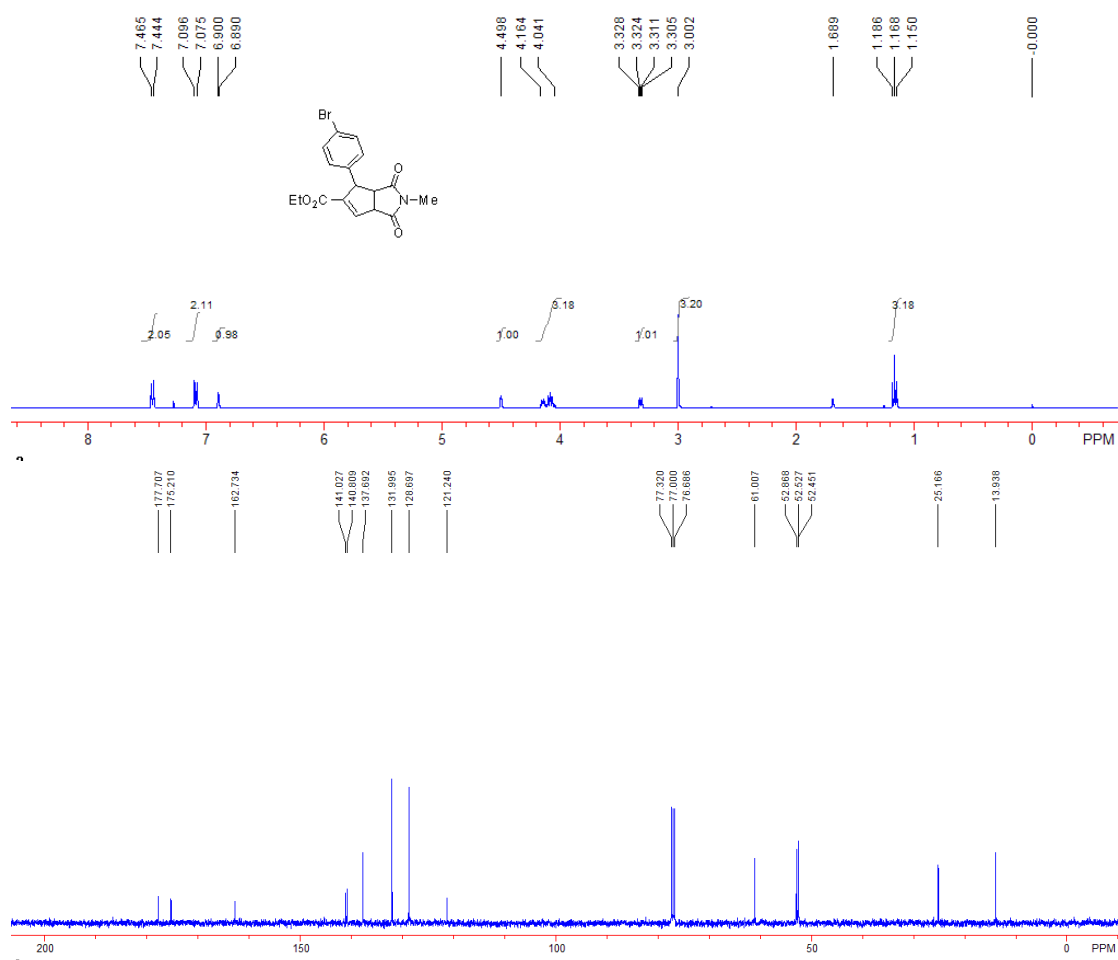

实验时间: 2011-09-08, 16:53:16  
谱图文件: E:\实验数据\HPLC\dhp\dhp-18-4-N-Me-IC-50-50-0.7-214-rac.org

实验者:  
报告时间: 2011-11-18, 22:15:21  
积分方法: 面积归一法

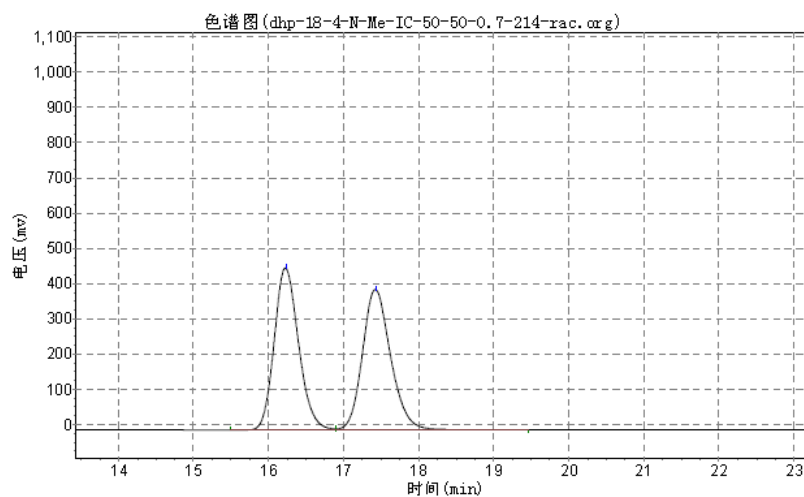

分析结果表

| 峰号 | 峰名 | 保留时间   | 峰高         | 峰面积          | 含量       |
|----|----|--------|------------|--------------|----------|
| 1  |    | 16.232 | 459044.594 | 10378357.000 | 49.9012  |
| 2  |    | 17.432 | 398001.969 | 10419444.000 | 50.0988  |
| 总计 |    |        | 857046.563 | 20797801.000 | 100.0000 |

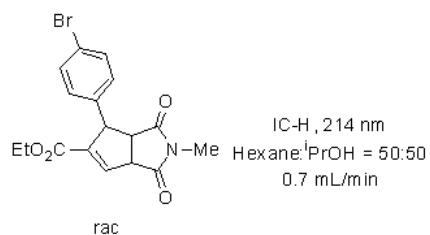

实验时间: 2011-09-08, 17:32:39  
谱图文件: E:\实验数据\HPLC\dhp\dhp-18-4-N-Me-IC-50-50-0.7-214-asy.org

实验者:  
报告时间: 2011-11-18, 22:16:28  
积分方法: 面积归一法

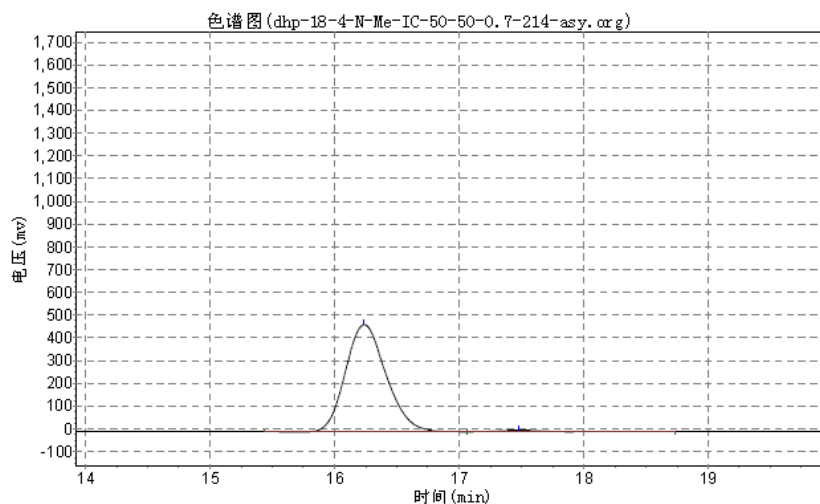

分析结果表

| 峰号 | 峰名 | 保留时间   | 峰高         | 峰面积          | 含量       |
|----|----|--------|------------|--------------|----------|
| 1  |    | 16.238 | 472927.594 | 10805376.000 | 97.4862  |
| 2  |    | 17.477 | 9626.848   | 278624.625   | 2.5138   |
| 总计 |    |        | 482554.441 | 11084000.625 | 100.0000 |

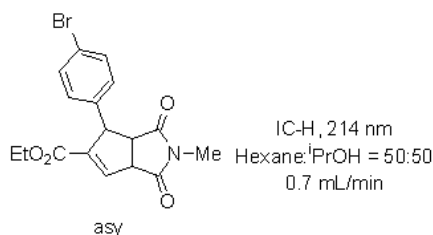

Chiral HPLC report: Enantiomeric excess was determined by HPLC with a Chiralcel IC-H column [ $\lambda = 214$  nm; eluent: hexane/isopropanol 50/50; flow rate: 0.7 mL/min;  $t_{\text{major}} = 16.24$  min,  $t_{\text{minor}} = 17.48$  min; ee = 95%;  $[\alpha]_{\text{D}}^{20} = +239.9$  (c 1.0,  $\text{CHCl}_3$ )].

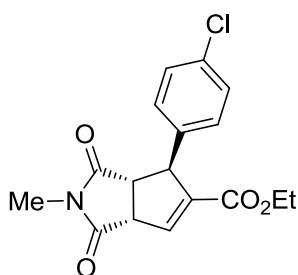

(3aR,4S,6aS)-ethyl 4-(4-chlorophenyl)-2-methyl-1,3-dioxo-1,2,3,3a,4,6a-hexahydrocyclopenta[c]pyrrole-5-carboxylate (**3j**). Yield: 30 mg, 90%; colorless oil; IR ( $\text{CH}_2\text{Cl}_2$ ):  $\nu$  2982, 1781,

1704, 1634, 1491, 1434, 1379, 1272, 1202, 1127, 1093, 1045, 1014, 1001, 959, 891, 874, 790, 751, 739, 666  $\text{cm}^{-1}$ ;  $^1\text{H}$  NMR (400 MHz,  $\text{CDCl}_3$ , TMS):  $\delta$  1.17 (3H, t,  $J = 6.8$  Hz,  $\text{CH}_3$ ), 3.00 (3H, s,  $\text{CH}_3$ ), 3.32 (1H, dd,  $J = 2.4, 7.6$  Hz, CH), 4.04–4.17 (3H, m,  $\text{CH}+\text{CH}_2$ ), 4.52 (1H, s, CH), 6.90 (1H, dd,  $J = 1.6, 2.4$  Hz, CH), 7.14 (2H, d,  $J = 8.0$  Hz, ArH), 7.30 (2H, d,  $J = 8.0$  Hz, ArH);  $^{13}\text{C}$  NMR (100 MHz,  $\text{CDCl}_3$ , TMS):  $\delta$  13.9, 25.2, 52.4, 52.6, 52.9, 61.0, 128.3, 129.0, 133.2, 137.6, 140.3, 141.1, 162.8, 175.2, 177.7; MS (ESI)  $m/z$  (%): 334.0 (100)  $[\text{M}^+ + 1]$ ; HRMS (MALDI) Calcd. for  $\text{C}_{17}\text{H}_{16}\text{NO}_4\text{ClNa}$  ( $\text{M}^+ + \text{Na}$ ) requires 356.0660, found: 356.0659; Enantiomeric excess was determined by HPLC with a Chiralcel IC-H column [ $\lambda = 214$  nm; eluent: hexane/isopropanol 80/20; flow rate: 0.7 mL/min;  $t_{\text{major}} = 31.48$  min,  $t_{\text{minor}} = 35.18$  min; ee = 97%;  $[\alpha]_{\text{D}}^{20} = +263.0$  ( $c$  1.0,  $\text{CHCl}_3$ )].

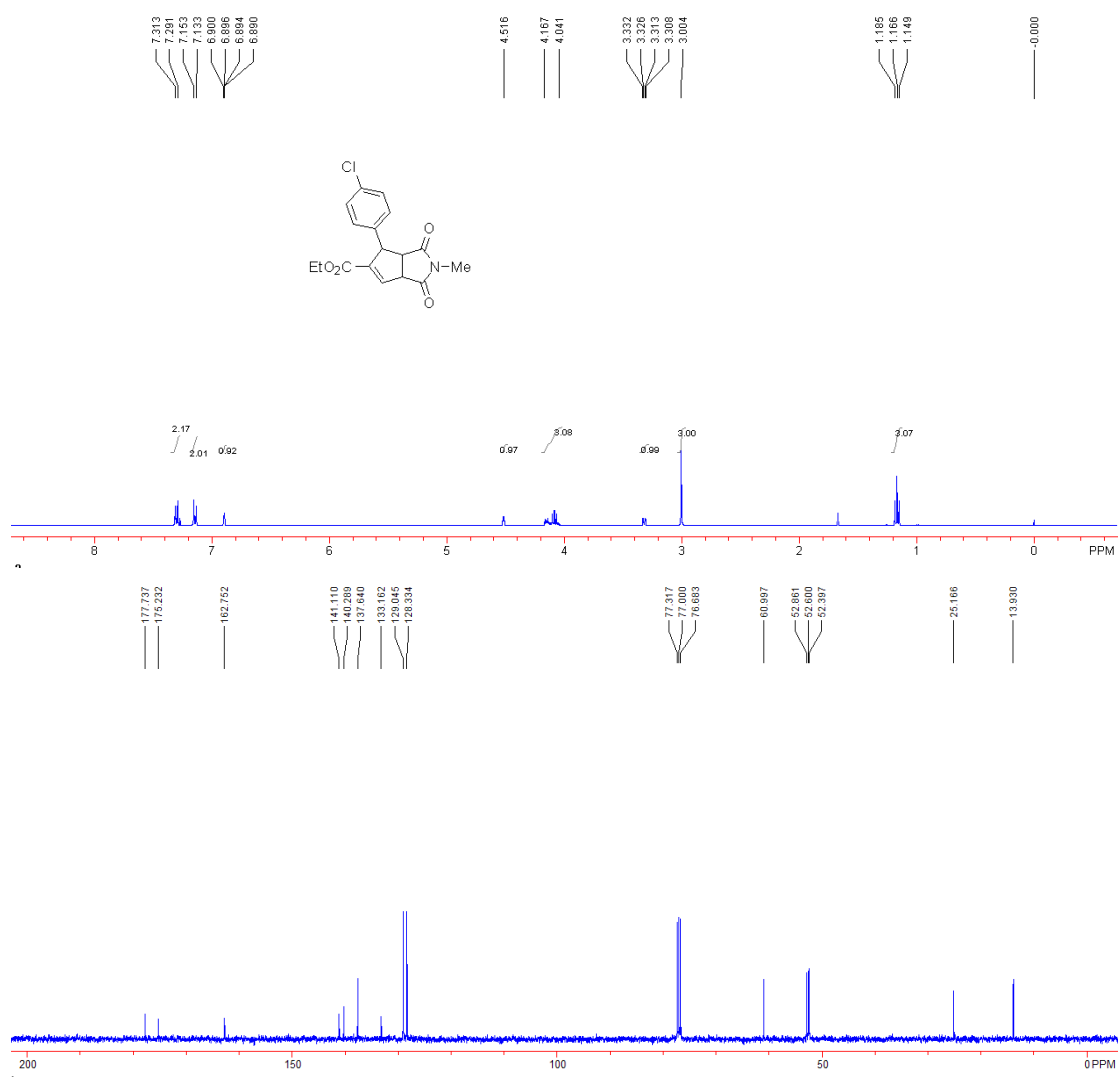

实验时间: 2011-09-09, 13:47:02  
谱图文件: E:\实验数据\HPLC\dhp\18-16-N-Me-IC-80-20-0.7-214-rac.org

实验者:  
报告时间: 2011-11-18, 22:07:53  
积分方法: 面积归一法

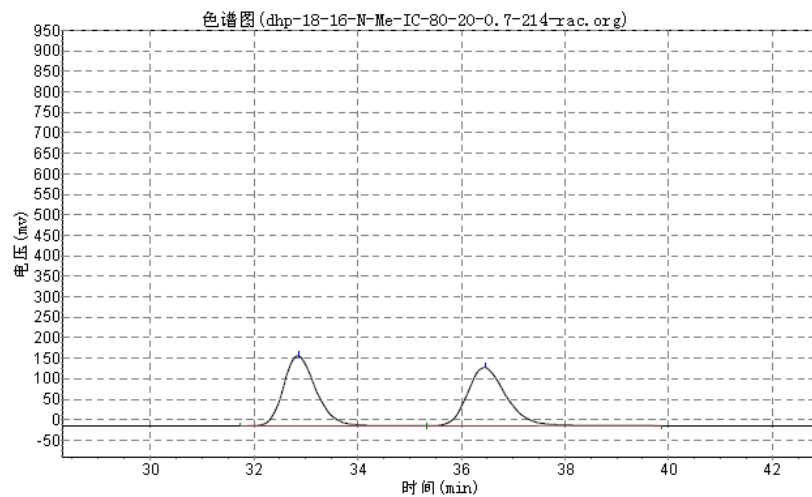

分析结果表

| 峰号 | 峰名 | 保留时间   | 峰高         | 峰面积          | 含量       |
|----|----|--------|------------|--------------|----------|
| 1  |    | 32.865 | 169878.000 | 7370794.000  | 50.1006  |
| 2  |    | 36.465 | 141510.000 | 7341192.500  | 49.8994  |
| 总计 |    |        | 311388.000 | 14711986.500 | 100.0000 |

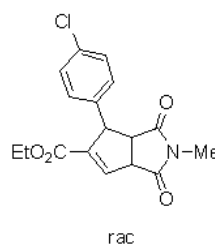

IC-H, 214 nm  
Hexane: iPrOH = 80:20  
0.7 mL/min

实验时间: 2011-09-09, 14:44:07

谱图文件: E:\实验数据\HPLC\dhp\dhp-18-16-N-Me-IC-80-20-0.7-214-asy.org

实验者:

报告时间: 2011-11-18, 22:09:22

积分方法: 面积归一法

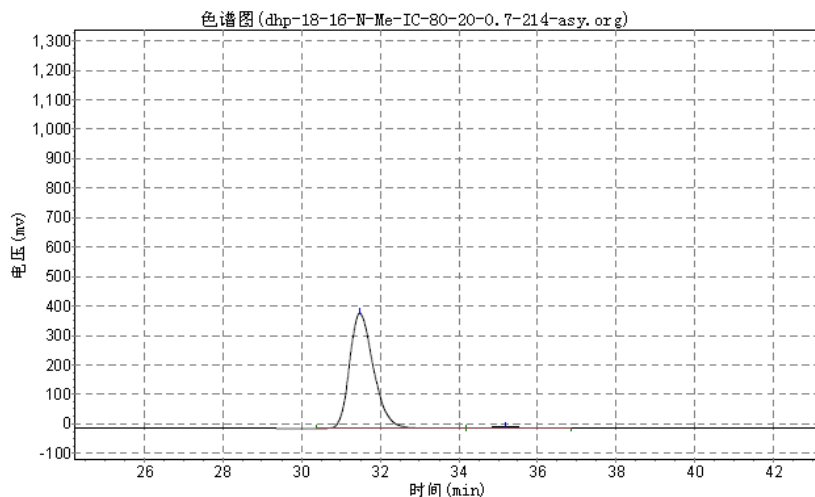

分析结果表

| 峰号 | 峰名 | 保留时间   | 峰高         | 峰面积          | 含量       |
|----|----|--------|------------|--------------|----------|
| 1  |    | 31.480 | 391102.375 | 16476227.000 | 98.2510  |
| 2  |    | 35.177 | 5563.332   | 293290.656   | 1.7490   |
| 总计 |    |        | 396665.707 | 16769517.656 | 100.0000 |

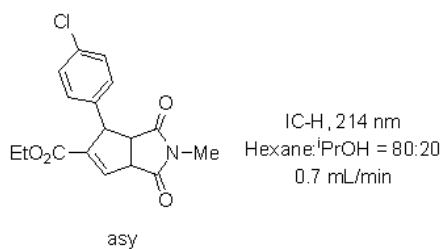

Chiral HPLC report: Enantiomeric excess was determined by HPLC with a Chiralcel IC-H column [ $\lambda = 214$  nm; eluent: hexane/isopropanol 80/20; flow rate: 0.7 mL/min;  $t_{\text{major}} = 31.48$  min,  $t_{\text{minor}} = 35.18$  min; ee = 97%;  $[\alpha]_{\text{D}}^{20} = +263.0$  (c 1.0,  $\text{CHCl}_3$ )].

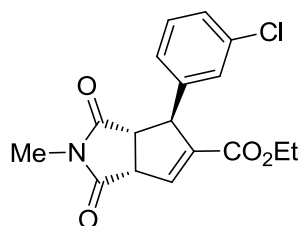

(3aR,4S,6aS)-ethyl 4-(3-chlorophenyl)-2-methyl-1,3-dioxo-1,2,3,3a,4,6a-hexahydrocyclopenta[c]pyrrole-5-carboxylate (**3k**). Yield: 27 mg, 81%; colorless oil; IR ( $\text{CH}_2\text{Cl}_2$ ):  $\nu$  2981, 2936,



1699, 1595, 1432, 1378, 1270, 1203, 1127, 1095, 1001, 960, 783, 765, 737, 699  $\text{cm}^{-1}$ ;  $^1\text{H}$  NMR (400 MHz,  $\text{CDCl}_3$ , TMS):  $\delta$  1.17 (3H, t,  $J = 7.2$  Hz,  $\text{CH}_3$ ), 3.01 (3H, s,  $\text{CH}_3$ ), 3.34 (1H, dd,  $J = 2.0, 7.2$  Hz, CH), 4.05–4.19 (3H, m, CH+ $\text{CH}_2$ ), 4.51 (1H, s, CH), 6.92 (1H, dd,  $J = 1.6, 2.4$  Hz, CH), 7.12 (1H, dd,  $J = 1.6, 7.2$  Hz, ArH), 7.17 (1H, s, ArH), 7.23–7.29 (2H, m, ArH);  $^{13}\text{C}$  NMR (100 MHz,  $\text{CDCl}_3$ , TMS):  $\delta$  13.9, 25.2, 52.5, 52.6, 52.9, 61.0, 125.3, 127.0, 127.6, 130.2, 134.7, 137.9, 140.9, 143.7, 162.7, 175.2, 177.7; MS (MALDI)  $m/z$  (%): 379.2 (100) [ $\text{M}^+ + \text{HCO}_2\text{H}$ ]; HRMS (MALDI) Calcd. for  $\text{C}_{17}\text{H}_{17}\text{NO}_4\text{Cl}$  ( $\text{M}^+ + 1$ ) requires 334.0841, found: 334.0847; Enantiomeric excess was determined by HPLC with a Chiralcel IC-H column [ $\lambda = 214$  nm; eluent: hexane/isopropanol 80/20; flow rate: 0.7 mL/min;  $t_{\text{major}} = 55.36$  min,  $t_{\text{minor}} = 70.69$  min; ee = 97%;  $[\alpha]_{\text{D}}^{20} = +316.0$  (c 1.0,  $\text{CHCl}_3$ )].

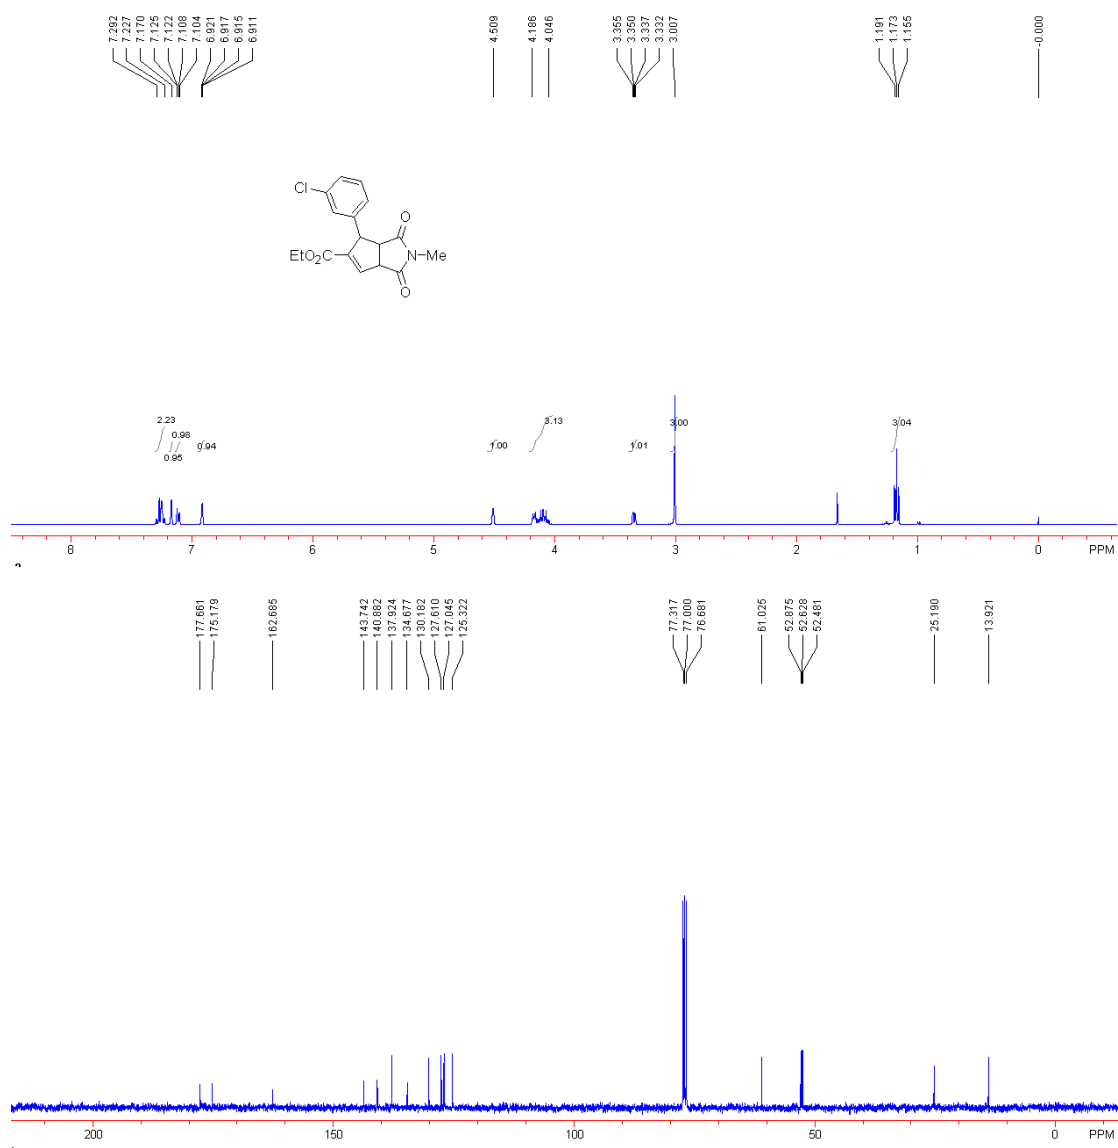

实验时间: 2011-11-24, 19:23:05  
谱图文件: E:\实验数据\HPLC\dhp\dhp-19-15-IC-80-20-0.7-214-  
rac.org

实验者:  
报告时间: 2011-11-26, 10:41:37  
积分方法: 面积归一法

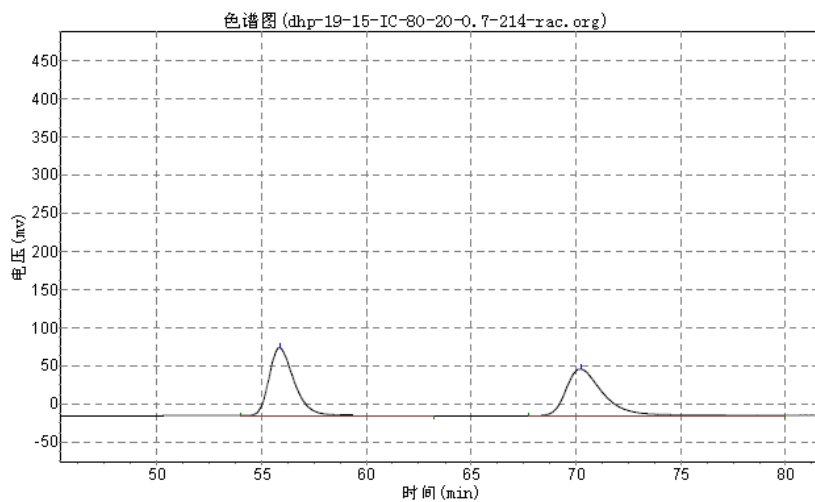

分析结果表

| 峰号 | 峰名 | 保留时间   | 峰高         | 峰面积          | 含量       |
|----|----|--------|------------|--------------|----------|
| 1  |    | 55.865 | 88220.570  | 7376706.500  | 50.1241  |
| 2  |    | 70.265 | 60781.105  | 7340167.500  | 49.8759  |
| 总计 |    |        | 149001.676 | 14716874.000 | 100.0000 |

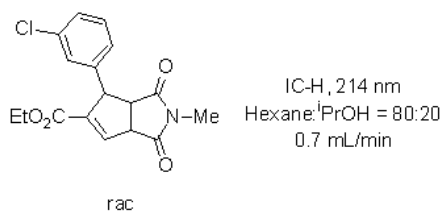

实验时间: 2011-11-24, 20:49:22  
谱图文件: E:\实验数据\HPLC\dhp\19-15-IC-80-20-0.7-214-asy.org

实验者:  
报告时间: 2011-11-26, 10:43:32  
积分方法: 面积归一法

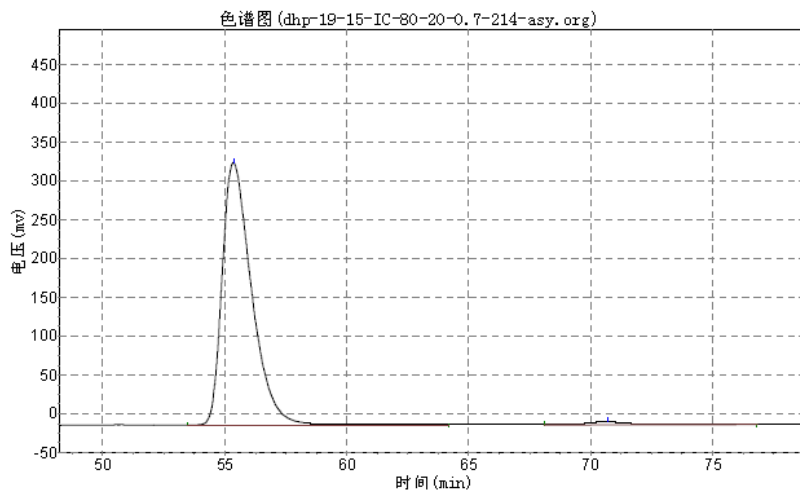

分析结果表

| 峰号 | 峰名 | 保留时间   | 峰高         | 峰面积          | 含量       |
|----|----|--------|------------|--------------|----------|
| 1  |    | 55.365 | 337659.688 | 28361346.000 | 98.3254  |
| 2  |    | 70.698 | 3539.049   | 483030.406   | 1.6746   |
| 总计 |    |        | 341198.737 | 28844376.406 | 100.0000 |

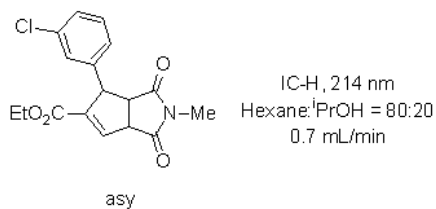

Chiral HPLC report: Enantiomeric excess was determined by HPLC with a Chiralcel IC-H column [ $\lambda = 214$  nm; eluent: hexane/isopropanol 80/20; flow rate: 0.7 mL/min;  $t_{\text{major}} = 55.36$  min,  $t_{\text{minor}} = 70.69$  min; ee = 97%;  $[\alpha]_{\text{D}}^{20} = +316.0$  ( $c$  1.0,  $\text{CHCl}_3$ )].

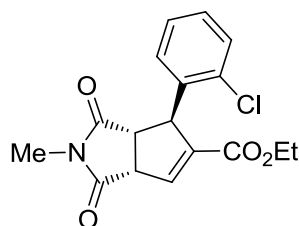

(3aR,4R,6aS)-ethyl 4-(2-chlorophenyl)-2-methyl-1,3-dioxo-1,2,3,3a,4,6a-hexahydrocyclopenta[c]pyrrole-5-carboxylate (**3l**). Yield: 13 mg, 39%; colorless oil; IR ( $\text{CH}_2\text{Cl}_2$ ):  $\nu$  2982, 1782,

1705, 1635, 1474, 1433, 1378, 1307, 1268, 1201, 1127, 1096, 1052, 1037, 1000, 959, 792, 758, 690  $\text{cm}^{-1}$ ;  $^1\text{H}$  NMR (400 MHz,  $\text{CDCl}_3$ , TMS):  $\delta$  1.14 (3H, t,  $J = 7.2$  Hz,  $\text{CH}_3$ ), 3.01 (3H, s,  $\text{CH}_3$ ), 3.37 (1H, d,  $J = 7.2$  Hz, CH), 4.03–4.16 (3H, m, CH+ $\text{CH}_2$ ), 5.02 (1H, s, CH), 6.97 (1H, dd,  $J = 1.6, 2.0$  Hz, CH), 7.04–7.05 (1H, m, ArH), 7.20–7.22 (2H, m, ArH), 7.41–7.43 (1H, m, ArH);  $^{13}\text{C}$  NMR (100 MHz,  $\text{CDCl}_3$ , TMS):  $\delta$  13.9, 25.2, 51.9, 53.2, 61.0, 127.1, 128.7, 130.3, 133.6, 138.6, 138.8, 140.5, 162.7, 175.2, 177.4; MS (ESI)  $m/z$  (%): 334.1 (100) [ $\text{M}^+ + 1$ ]; HRMS (MALDI) Calcd. for  $\text{C}_{17}\text{H}_{16}\text{NO}_4\text{ClNa}$  ( $\text{M}^+ + \text{Na}$ ) requires 356.0660, found: 356.0651; Enantiomeric excess was determined by HPLC with a Chiralcel IC-H column [ $\lambda = 214$  nm; eluent: hexane/isopropanol 80/20; flow rate: 0.7 mL/min;  $t_{\text{major}} = 42.76$  min,  $t_{\text{minor}} = 48.89$  min; ee = 73%;  $[\alpha]_{\text{D}}^{20} = +245.6$  ( $c$  1.0,  $\text{CHCl}_3$ )].

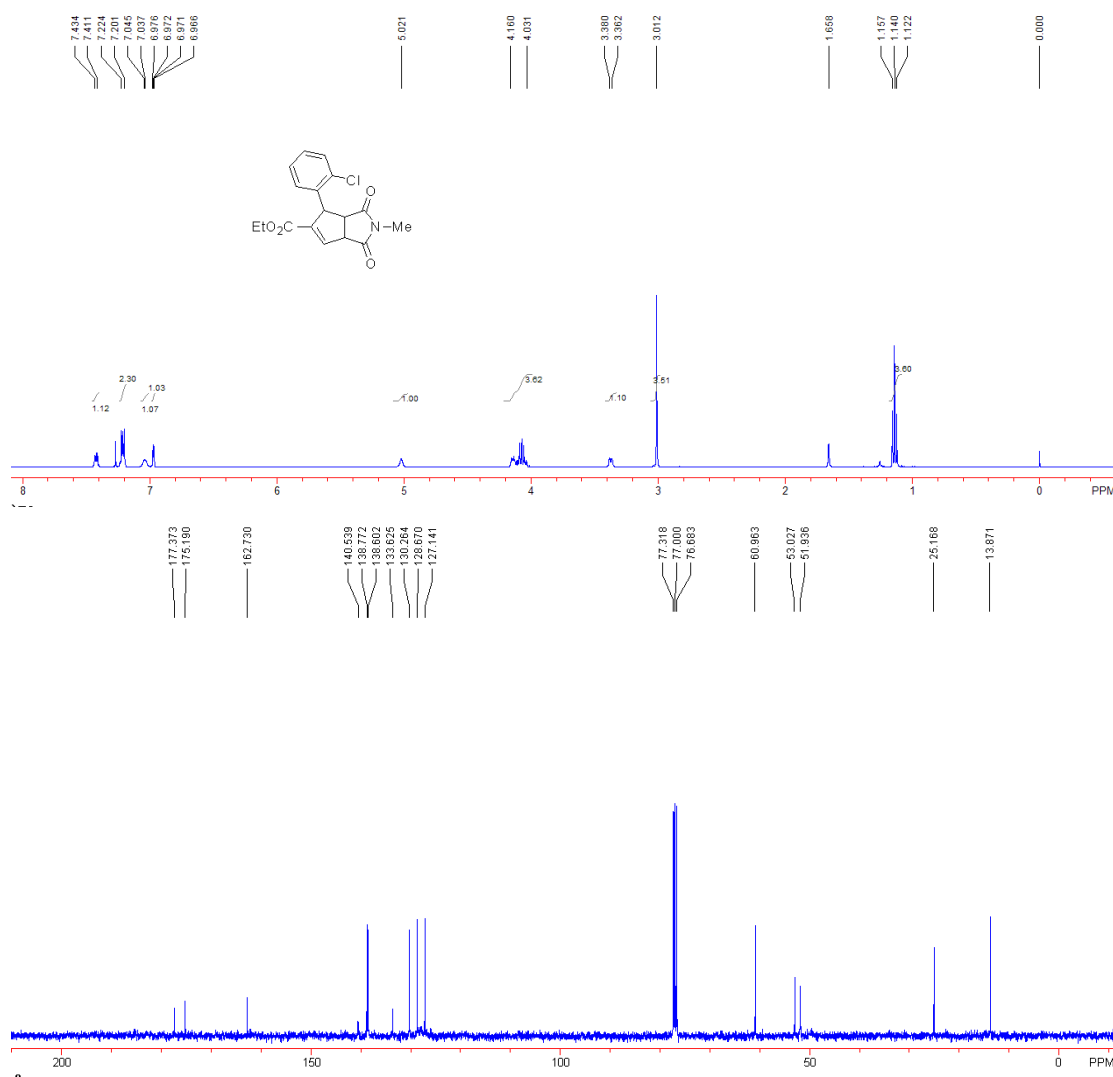

实验时间: 2011-09-19, 18:08:24

谱图文件: E:\实验数据\HPLC\dhp\dhp-18-26-N-Me-IC-80-20-0.7-214-rac.org

实验者:

报告时间: 2011-11-18, 22:17:07  
积分方法: 面积归一法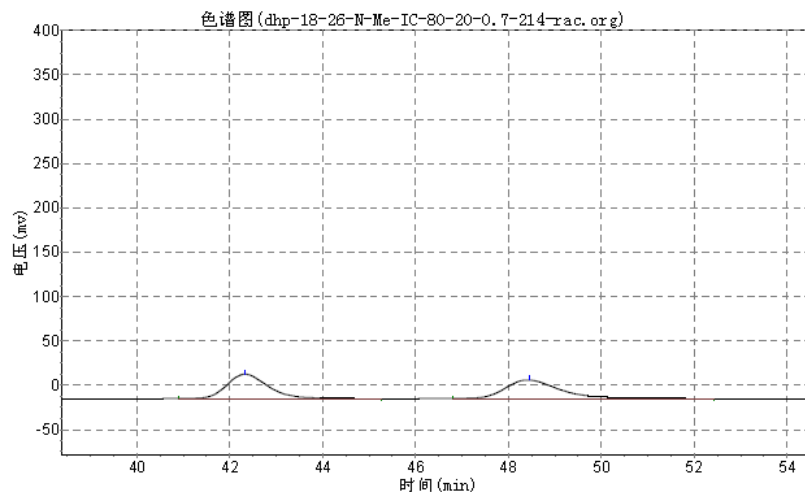

分析结果表

| 峰号 | 峰名 | 保留时间   | 峰高        | 峰面积         | 含量       |
|----|----|--------|-----------|-------------|----------|
| 1  |    | 42.332 | 27284.703 | 1654170.375 | 50.1206  |
| 2  |    | 48.448 | 20712.541 | 1646209.250 | 49.8794  |
| 总计 |    |        | 47997.244 | 3300379.625 | 100.0000 |

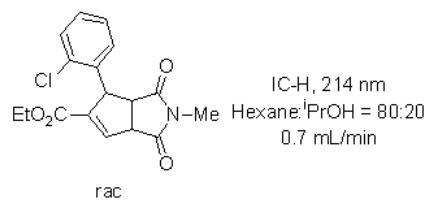

实验时间: 2011-09-19, 19:16:19

谱图文件: E:\实验数据\HPLC\dhp\dhp-18-26-N-Me-IC-80-20-0.7-214-asy.org

实验者:

报告时间: 2011-11-18, 22:17:38

积分方法: 面积归一法

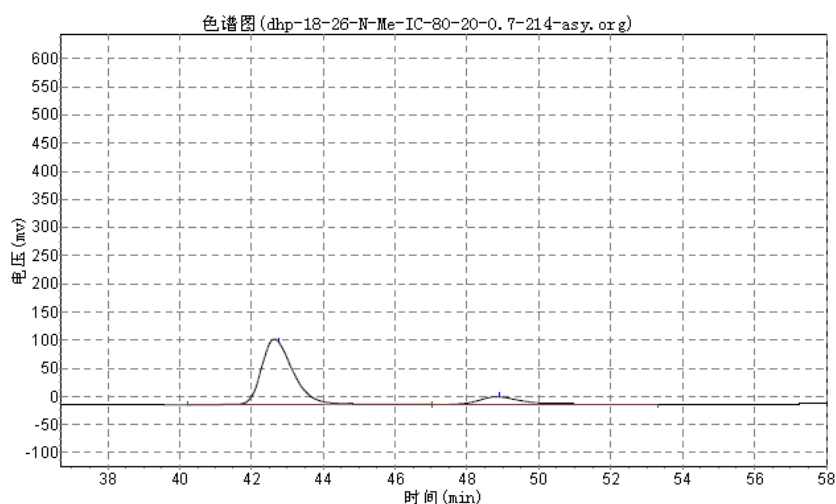

分析结果表

| 峰号 | 峰名 | 保留时间   | 峰高         | 峰面积         | 含量       |
|----|----|--------|------------|-------------|----------|
| 1  |    | 42.765 | 114180.750 | 6967741.500 | 86.6999  |
| 2  |    | 48.898 | 12949.637  | 1068876.625 | 13.3001  |
| 总计 |    |        | 127130.387 | 8036618.125 | 100.0000 |

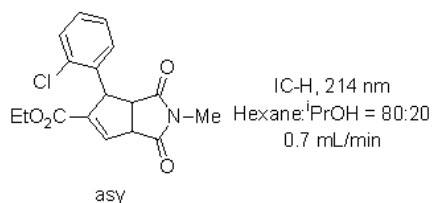

Chiral HPLC report: Enantiomeric excess was determined by HPLC with a Chiralcel IC-H column [ $\lambda = 214$  nm; eluent: hexane/isopropanol 80/20; flow rate: 0.7 mL/min;  $t_{\text{major}} = 42.76$  min,  $t_{\text{minor}} = 48.89$  min; ee = 73%;  $[\alpha]_{\text{D}}^{20} = +245.6$  ( $c$  1.0,  $\text{CHCl}_3$ )].

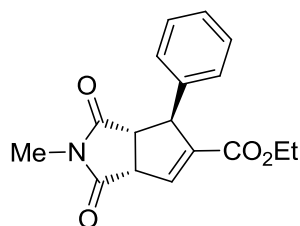

(3aR,4S,6aS)-ethyl

2-methyl-1,3-dioxo-4-phenyl-1,2,3,3a,4,6a-hexahydrocyclopenta[*c*]pyrrole-5-carboxylate (3m). Yield: 22 mg, 74%; colorless oil; IR ( $\text{CH}_2\text{Cl}_2$ ):  $\nu$  3029, 2981,

1781, 1705, 1634, 1601, 1558, 1540, 1506, 1495, 1454, 1433, 1379, 1329, 1272, 1202, 1127, 1095, 1045, 997, 959, 889, 872, 793, 761, 736, 700  $\text{cm}^{-1}$ ;  $^1\text{H}$  NMR (400 MHz,  $\text{CDCl}_3$ , TMS):  $\delta$  1.15 (3H, t,  $J = 7.2$  Hz,  $\text{CH}_3$ ), 3.00 (3H, s,  $\text{CH}_3$ ), 3.37 (1H, d,  $J = 7.6$  Hz, CH), 4.01–4.17 (3H, m,  $\text{CH} + \text{CH}_2$ ), 4.54 (1H, d,  $J = 1.6$  Hz, CH), 6.89 (1H, dd,  $J = 1.6, 2.4$  Hz, CH), 7.20 (2H, d,  $J = 8.0$  Hz, ArH), 7.25–7.27 (1H, m, ArH), 7.31–7.35 (2H, m, ArH);  $^{13}\text{C}$  NMR (100 MHz,  $\text{CDCl}_3$ , TMS):  $\delta$  13.9, 25.1, 52.8, 52.9, 53.0, 60.9, 126.9, 127.3, 128.9, 137.3, 141.5, 141.8, 163.0, 175.5, 178.0; MS (ESI)  $m/z$  (%): 300.1 (100)  $[\text{M}^+ + 1]$ ; HRMS (MALDI) Calcd. for  $\text{C}_{17}\text{H}_{17}\text{NO}_4\text{Na}$  ( $\text{M}^+ + \text{Na}$ ) requires 322.1050, found: 322.1053; Enantiomeric excess was determined by HPLC with a Chiralcel IC-H column [ $\lambda = 214$  nm; eluent: hexane/isopropanol 80/20; flow rate: 0.7 mL/min;  $t_{\text{major}} = 35.87$  min,  $t_{\text{minor}} = 43.68$  min; ee = 95%;  $[\alpha]_{\text{D}}^{20} = +276.5$  ( $c$  1.0,  $\text{CHCl}_3$ )].

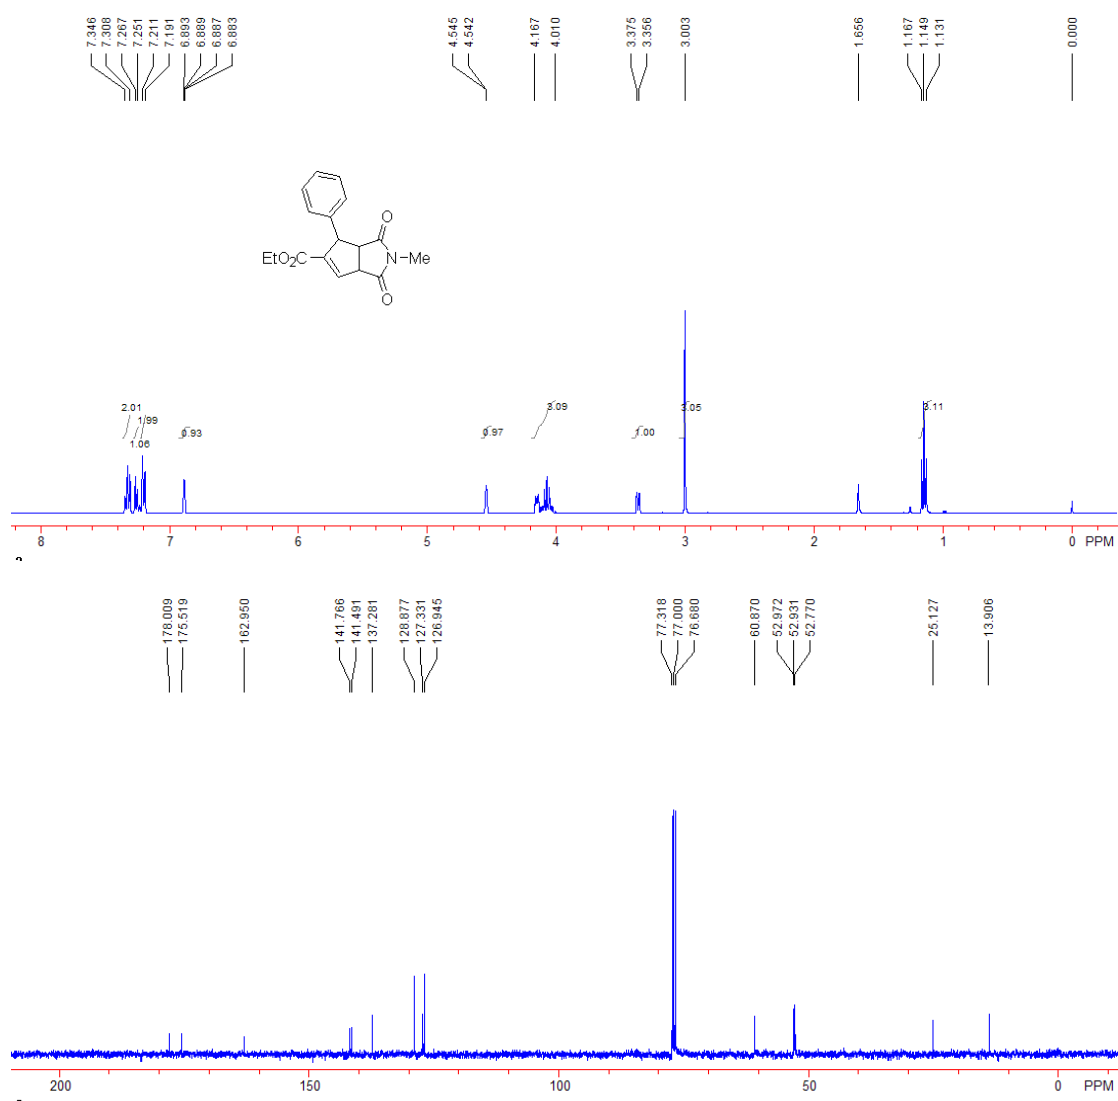

实验时间: 2011-09-09, 15:45:23

谱图文件: E:\实验数据\HPLC\dhp\dhp-18-17-N-Me-IC-80-20-0.7-214-rac.org

实验者:

报告时间: 2011-11-18, 22:12:30  
积分方法: 面积归一法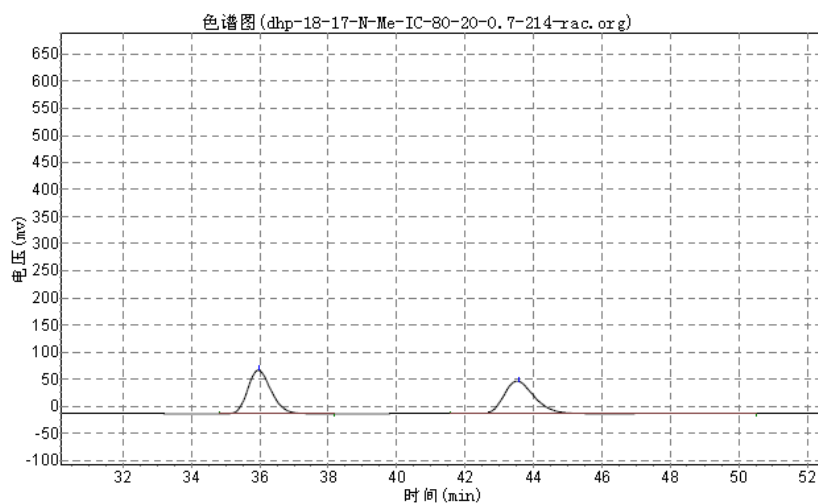

分析结果表

| 峰号 | 峰名 | 保留时间   | 峰高         | 峰面积         | 含量       |
|----|----|--------|------------|-------------|----------|
| 1  |    | 35.965 | 80659.461  | 3909325.500 | 50.2041  |
| 2  |    | 43.565 | 60477.879  | 3877546.500 | 49.7959  |
| 总计 |    |        | 141137.340 | 7786872.000 | 100.0000 |

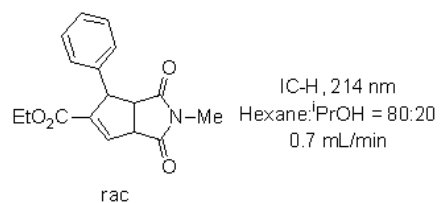



实验时间: 2011-09-09, 16:48:44

谱图文件: E:\实验数据\HPLC\dhp\dhp-18-17-N-Me-IC-80-20-0.7-214-asy.org

实验者:

报告时间: 2011-11-18, 22:13:15  
积分方法: 面积归一法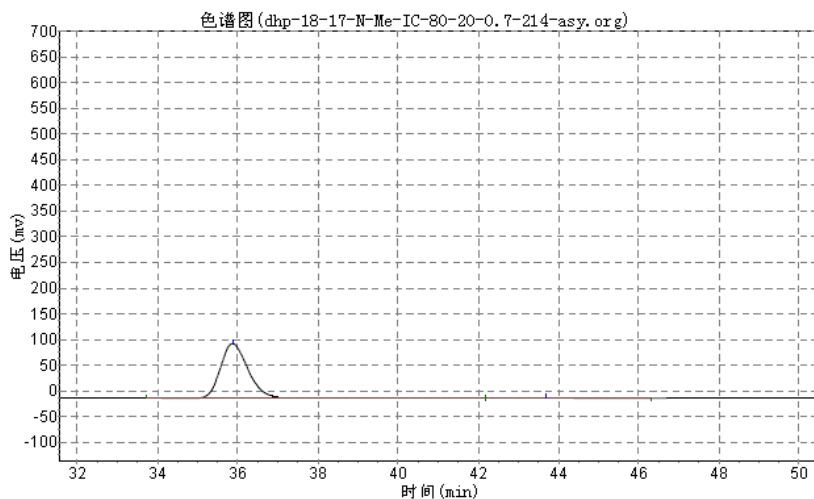

分析结果表

| 峰号 | 峰名 | 保留时间   | 峰高         | 峰面积         | 含量       |
|----|----|--------|------------|-------------|----------|
| 1  |    | 35.873 | 106873.508 | 5156261.500 | 97.2786  |
| 2  |    | 43.682 | 2095.773   | 144247.609  | 2.7214   |
| 总计 |    |        | 108969.281 | 5300509.109 | 100.0000 |

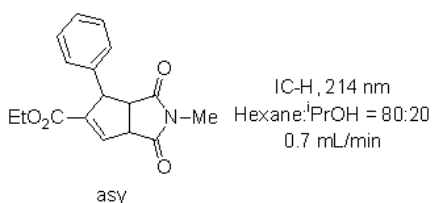

Chiral HPLC report: Enantiomeric excess was determined by HPLC with a Chiralcel IC-H column [ $\lambda = 214$  nm; eluent: hexane/isopropanol 80/20; flow rate: 0.7 mL/min;  $t_{\text{major}} = 35.87$  min,  $t_{\text{minor}} = 43.68$  min; ee = 95%;  $[\alpha]_{\text{D}}^{20} = +276.5$  ( $c$  1.0,  $\text{CHCl}_3$ )].

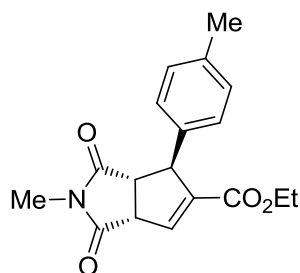

(3aR,4S,6aS)-ethyl

2-methyl-1,3-dioxo-4-(p-tolyl)-1,2,3,3a,4,6a-hexahydrocyclo-

penta[c]pyrrole-5-carboxylate (3n). Yield: 20 mg, 64%; colorless oil; IR ( $\text{CH}_2\text{Cl}_2$ ):  $\nu$  2981, 1780,

1705, 1653, 1634, 1558, 1540, 1513, 1433, 1379, 1327, 1271, 1201, 1126, 1094, 1045, 1000, 959, 819, 786, 739, 721  $\text{cm}^{-1}$ ;  $^1\text{H}$  NMR (400 MHz,  $\text{CDCl}_3$ , TMS):  $\delta$  1.16 (3H, t,  $J = 7.2$  Hz,  $\text{CH}_3$ ), 2.32 (3H, s,  $\text{CH}_3$ ), 3.00 (3H, s,  $\text{CH}_3$ ), 3.34 (1H, dd,  $J = 2.0, 7.2$  Hz, CH), 4.03–4.15 (3H, m, CH+ $\text{CH}_2$ ), 4.51 (1H, d,  $J = 2.4$  Hz, CH), 6.86–6.87 (1H, m, CH), 7.09 (2H, d,  $J = 8.0$  Hz, ArH), 7.13 (2H, d,  $J = 8.0$  Hz, ArH);  $^{13}\text{C}$  NMR (100 MHz,  $\text{CDCl}_3$ , TMS):  $\delta$  13.9, 21.0, 25.1, 52.6, 52.89, 52.92, 60.8, 126.8, 129.5, 136.99, 137.03, 138.8, 141.6, 163.0, 175.6, 178.1; MS (ESI)  $m/z$  (%): 314.1 (100) [ $\text{M}^+ + 1$ ]; HRMS (MALDI) Calcd. for  $\text{C}_{18}\text{H}_{19}\text{NO}_4\text{Na}$  ( $\text{M}^+ + \text{Na}$ ) requires 336.1206, found: 336.1207; Enantiomeric excess was determined by HPLC with a Chiralcel IC-H column [ $\lambda = 214$  nm; eluent: hexane/isopropanol 80/20; flow rate: 0.7 mL/min;  $t_{\text{major}} = 33.94$  min,  $t_{\text{minor}} = 41.40$  min; ee = 96%;  $[\alpha]_{\text{D}}^{20} = +258.2$  (c 1.0,  $\text{CHCl}_3$ )].

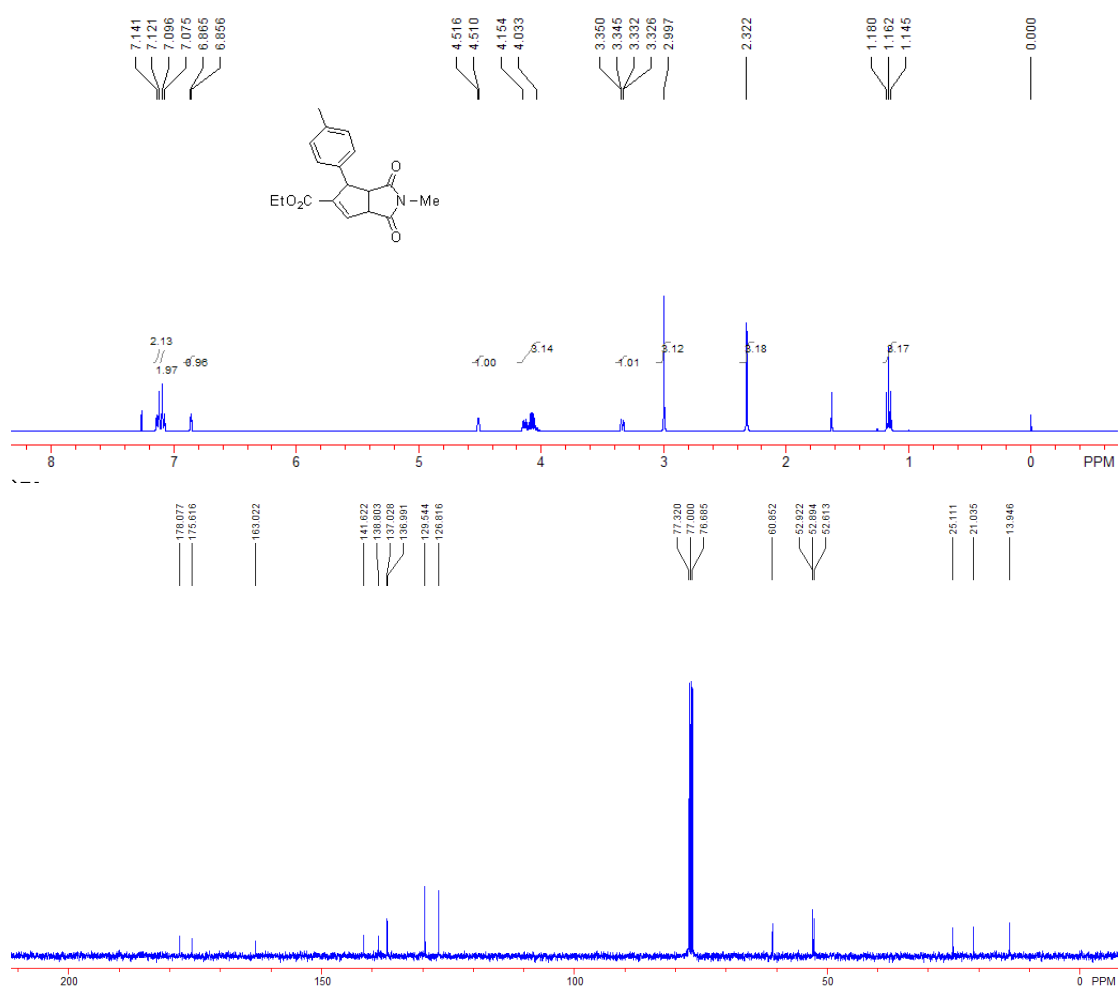

实验时间: 2011-09-14, 18:46:11  
谱图文件: E:\实验数据\HPLC\dhp\dhp-18-21-N-Me-IC-80-20-0.7-214-rac.org

实验者:  
报告时间: 2011-11-18, 22:10:12  
积分方法: 面积归一法

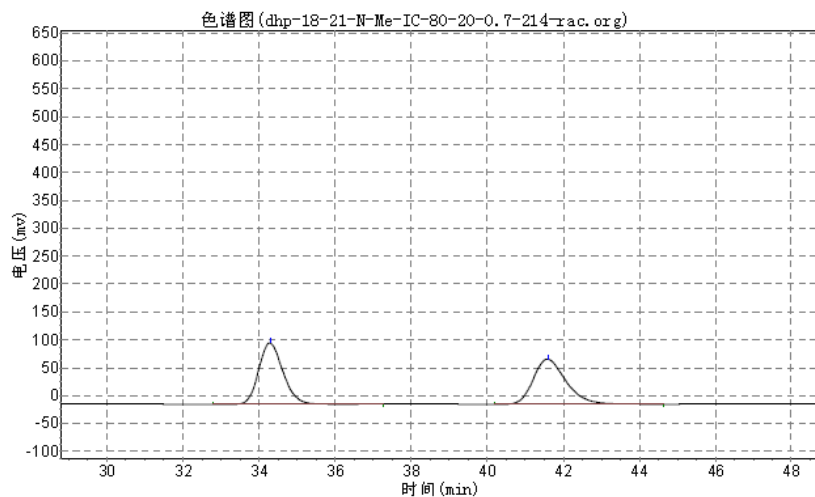

分析结果表

| 峰号 | 峰名 | 保留时间   | 峰高         | 峰面积         | 含量       |
|----|----|--------|------------|-------------|----------|
| 1  |    | 34.290 | 110073.250 | 4924989.000 | 50.3600  |
| 2  |    | 41.590 | 80951.609  | 4854581.000 | 49.6400  |
| 总计 |    |        | 191024.859 | 9779570.000 | 100.0000 |

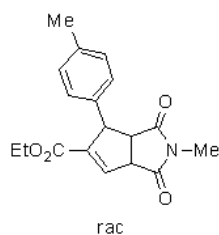

IC-H, 214 nm  
Hexane: iPrOH = 80:20  
0.7 mL/min

实验时间: 2011-09-14, 19:43:27  
谱图文件: E:\实验数据\HPLC\dhp\dhp-18-21-N-Me-IC-80-20-0.7-214-asy.org

实验者:  
报告时间: 2011-11-18, 22:10:58  
积分方法: 面积归一法

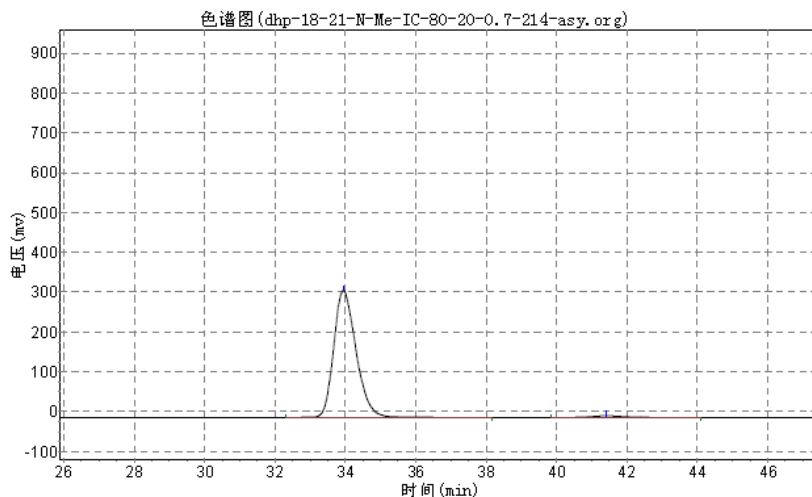

分析结果表

| 峰号 | 峰名 | 保留时间   | 峰高         | 峰面积          | 含量       |
|----|----|--------|------------|--------------|----------|
| 1  |    | 33.947 | 318548.594 | 14097616.000 | 97.9174  |
| 2  |    | 41.407 | 4603.955   | 299846.406   | 2.0826   |
| 总计 |    |        | 323152.549 | 14397462.406 | 100.0000 |

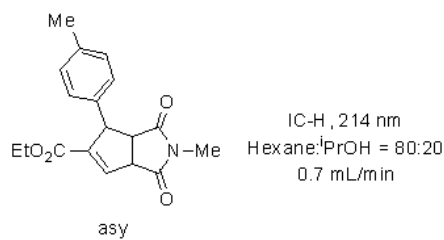

Chiral HPLC report: Enantiomeric excess was determined by HPLC with a Chiralcel IC-H column [ $\lambda = 214$  nm; eluent: hexane/isopropanol 80/20; flow rate: 0.7 mL/min;  $t_{\text{major}} = 33.94$  min,  $t_{\text{minor}} = 41.40$  min; ee = 96%;  $[\alpha]_{\text{D}}^{20} = +258.2$  ( $c$  1.0,  $\text{CHCl}_3$ )].

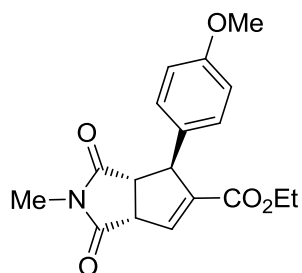

**(3a*R*,4*S*,6a*S*)-ethyl 4-(4-methoxyphenyl)-2-methyl-1,3-dioxo-1,2,3,3a,4,6ahexahydrocyclopenta[*c*]pyrrole-5-carboxylate (3o).** Yield: 18 mg, 55%; colorless oil; IR (CH<sub>2</sub>Cl<sub>2</sub>):  $\nu$  2937, 1780, 1704, 1632, 1610, 1512, 1433, 1379, 1274, 1203, 1178, 1126, 1094, 1033, 1000, 959, 833, 794, 727 cm<sup>-1</sup>; <sup>1</sup>H NMR (400 MHz, CDCl<sub>3</sub>, TMS):  $\delta$  1.16 (3H, t, *J* = 7.2 Hz, CH<sub>3</sub>), 3.00 (3H, s, CH<sub>3</sub>), 3.33 (1H, dd, *J* = 2.0, 7.2 Hz, CH), 3.79 (3H, s, CH<sub>3</sub>), 4.03–4.16 (3H, m, CH+CH<sub>2</sub>), 4.49–4.51 (1H, m, CH), 6.84–6.87 (3H, m, CH+ArH), 7.10–7.14 (2H, m, ArH); <sup>13</sup>C NMR (100 MHz, CDCl<sub>3</sub>, TMS):  $\delta$  13.9, 25.1, 52.2, 52.8, 52.9, 55.2, 60.8, 114.2, 128.0, 133.9, 136.8, 141.7, 158.7, 163.0, 175.6, 178.1; MS (ESI) *m/z* (%): 330.1 (100) [M<sup>+</sup> + 1]; HRMS (MALDI) Calcd. for C<sub>18</sub>H<sub>19</sub>NO<sub>5</sub>Na (M<sup>+</sup> + Na) requires 352.1156, found: 352.1145; Enantiomeric excess was determined by HPLC with a Chiralcel IC-H column [ $\lambda$  = 214 nm; eluent: hexane/isopropanol 50/50; flow rate: 0.7 mL/min; *t*<sub>major</sub> = 23.56 min, *t*<sub>minor</sub> = 34.64 min; ee = 96%; [ $\alpha$ ]<sub>D</sub><sup>20</sup> = +273.1 (*c* 1.0, CHCl<sub>3</sub>)].

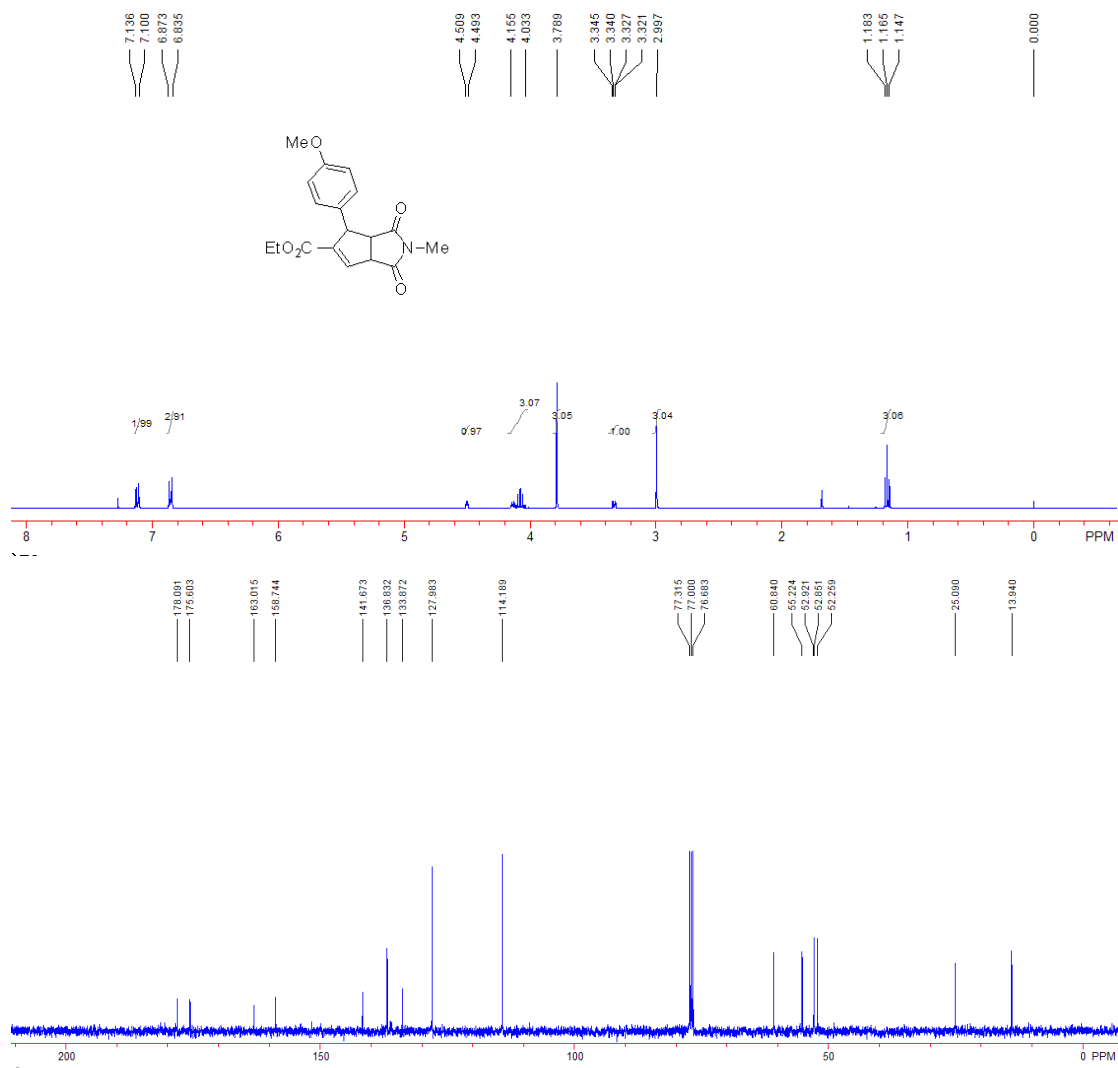

实验时间: 2011-09-14, 22:47:06

谱图文件:E:\实验数据\HPLC\dhp\dhp-18-22-N-Me-IC-50-50-0.7-214-rac.org

实验者:

报告时间: 2011-11-18, 22:13:58

积分方法: 面积归一法

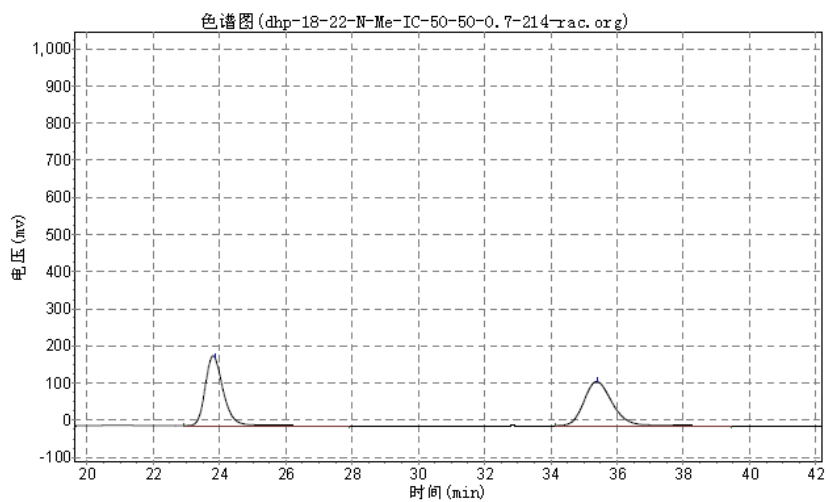

分析结果表

| 峰号 | 峰名 | 保留时间   | 峰高         | 峰面积          | 含量       |
|----|----|--------|------------|--------------|----------|
| 1  |    | 23.857 | 186342.219 | 7031739.500  | 50.0084  |
| 2  |    | 35.390 | 118534.805 | 7029379.500  | 49.9916  |
| 总计 |    |        | 304877.023 | 14061119.000 | 100.0000 |

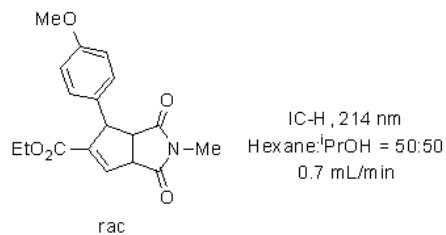

实验时间: 2011-09-14, 23:40:34  
 谱图文件: E:\实验数据\HPLC\dhp\dhp-18-22-N-Me-IC-50-50-0.7-214-asy.org

实验者:  
 报告时间: 2011-11-18, 22:14:52  
 积分方法: 面积归一法

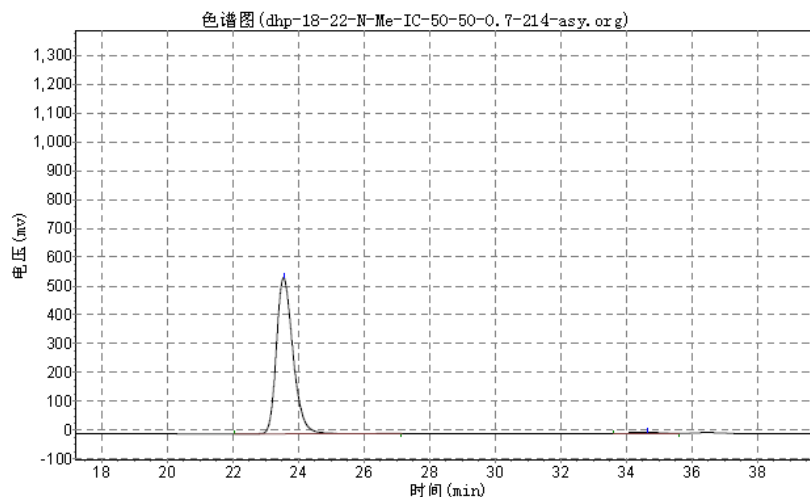

分析结果表

| 峰号 | 峰名 | 保留时间   | 峰高         | 峰面积          | 含量       |
|----|----|--------|------------|--------------|----------|
| 1  |    | 23.555 | 541739.313 | 19044796.000 | 98.7160  |
| 2  |    | 34.640 | 4509.533   | 247716.656   | 1.2840   |
| 总计 |    |        | 546248.845 | 19292512.656 | 100.0000 |

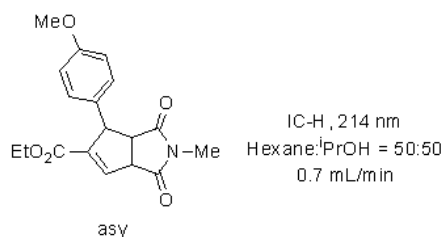

Chiral HPLC report: Enantiomeric excess was determined by HPLC with a Chiralcel IC-H column [ $\lambda = 214$  nm; eluent: hexane/isopropanol 50/50; flow rate: 0.7 mL/min;  $t_{\text{major}} = 23.56$  min,  $t_{\text{minor}} = 34.64$  min; ee = 96%;  $[\alpha]_{\text{D}}^{20} = +273.1$  (c 1.0,  $\text{CHCl}_3$ )].

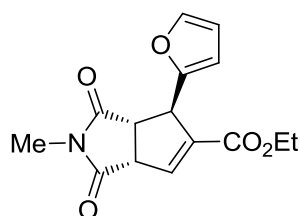

(3a*R*,4*R*,6a*S*)-ethyl 4-(furan-2-yl)-2-methyl-1,3-dioxo-1,2,3,3a,4,6a-hexahydrocyclopenta[c]pyrrole-5-carboxylate (3p). Yield: 26 mg, 69%; yellow oil; IR ( $\text{CH}_2\text{Cl}_2$ ):  $\nu$  2982, 1780,

1704, 1635, 1505, 1434, 1380, 1282, 1195, 1127, 1096, 1013, 959, 893, 856, 791, 738  $\text{cm}^{-1}$ ;  $^1\text{H}$  NMR (400 MHz,  $\text{CDCl}_3$ , TMS):  $\delta$  1.23 (3H, t,  $J = 7.2$  Hz,  $\text{CH}_3$ ), 3.00 (3H, s,  $\text{CH}_3$ ), 3.55 (1H, dd,  $J = 2.0, 7.2$  Hz, CH), 4.04–4.15 (3H, m, CH+ $\text{CH}_2$ ), 4.60 (1H, d,  $J = 2.0$  Hz, CH), 6.18 (1H, d,  $J = 3.2$  Hz, ArH), 6.32 (1H, dd,  $J = 2.0, 3.2$  Hz, CH), 6.83–6.84 (1H, m, ArH), 7.31–7.32 (1H, m, ArH);  $^{13}\text{C}$  NMR (100 MHz,  $\text{CDCl}_3$ , TMS):  $\delta$  14.0, 25.2, 46.2, 49.7, 52.9, 61.0, 106.5, 110.6, 138.1, 138.8, 142.0, 153.2, 162.8, 175.5, 177.7; MS (ESI)  $m/z$  (%): 290.0 (100) [ $\text{M}^+ + 1$ ]; HRMS (ESI) Calcd. for  $\text{C}_{15}\text{H}_{15}\text{NNaO}_5$  ( $\text{M}^+ + \text{Na}$ ) requires 312.0842, found: 312.0836; Enantiomeric excess was determined by HPLC with a Chiralcel IC-H column [ $\lambda = 214$  nm; eluent: hexane/isopropanol 50/50; flow rate: 0.7 mL/min;  $t_{\text{major}} = 19.80$  min,  $t_{\text{minor}} = 23.53$  min; ee = 96%;  $[\alpha]_{\text{D}}^{20} = +240.8$  (c 1.0,  $\text{CHCl}_3$ )].

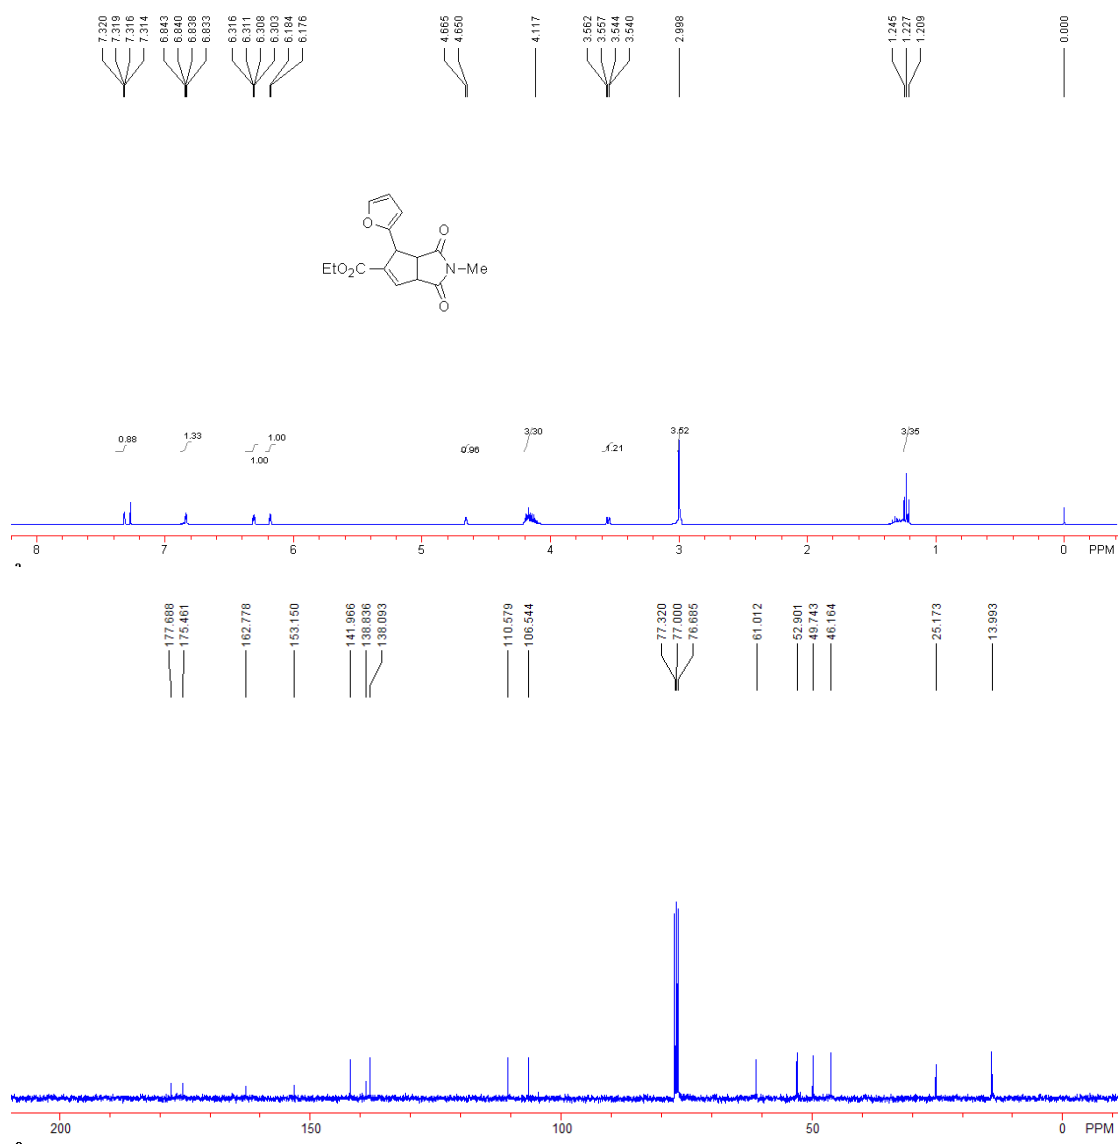



实验时间: 2011-10-21, 10:43:14  
谱图文件: E:\实验数据\HPLC\dhp\dhp-18-44-IC-50-50-0.7-214-  
rac.org

实验者:  
报告时间: 2011-11-26, 10:54:42  
积分方法: 面积归一法

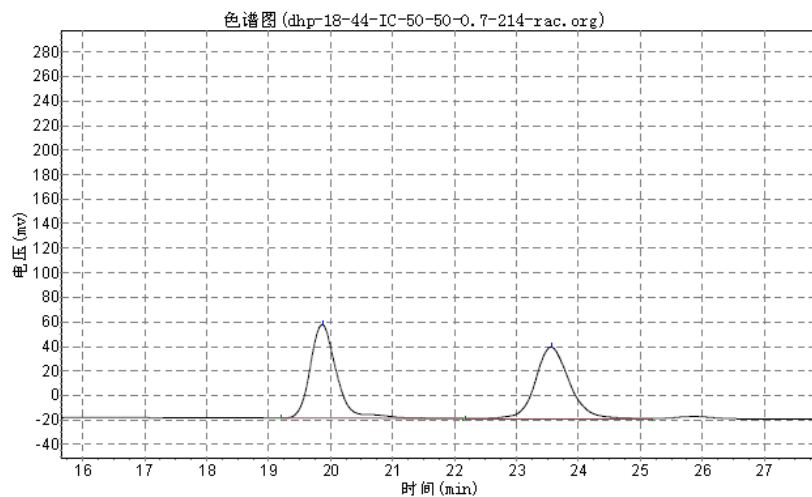

分析结果表

| 峰号 | 峰名 | 保留时间   | 峰高         | 峰面积         | 含量       |
|----|----|--------|------------|-------------|----------|
| 1  |    | 19.865 | 75889.680  | 2232837.000 | 50.1217  |
| 2  |    | 23.565 | 58237.262  | 2221996.250 | 49.8783  |
| 总计 |    |        | 134126.941 | 4454833.250 | 100.0000 |

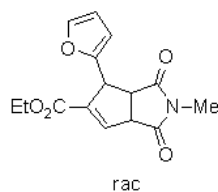

IC-H, 214 nm  
Hexane: iPrOH = 50:50  
0.7 mL/min

实验时间: 2011-10-21, 11:24:11  
谱图文件: E:\实验数据\HPLC\dhp\18-44-IC-50-50-0.7-214-asy.org

实验者:  
报告时间: 2011-11-26, 10:56:55  
积分方法: 面积归一法

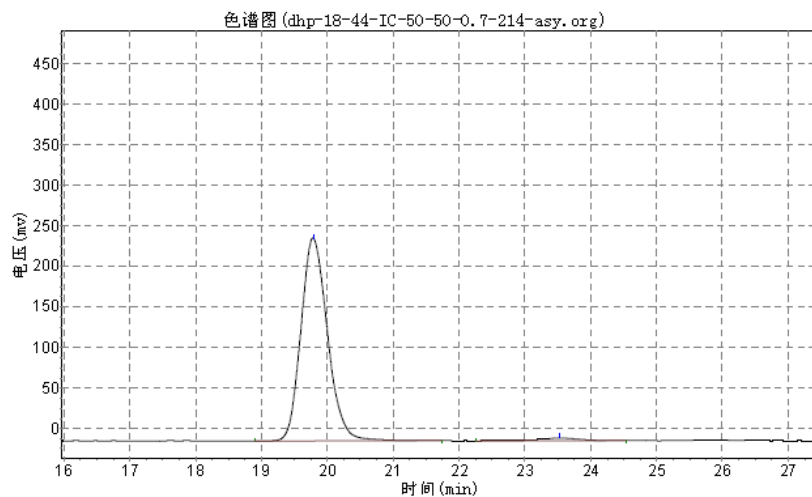

| 分析结果表 |    |        |            |             |          |
|-------|----|--------|------------|-------------|----------|
| 峰号    | 峰名 | 保留时间   | 峰高         | 峰面积         | 含量       |
| 1     |    | 19.798 | 250046.594 | 7008134.500 | 97.8119  |
| 2     |    | 23.532 | 3327.882   | 156772.406  | 2.1881   |
| 总计    |    |        | 253374.476 | 7164906.906 | 100.0000 |

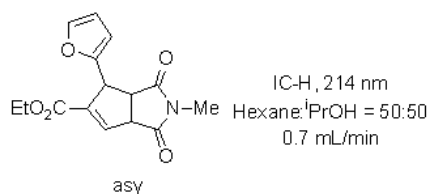

Chiral HPLC report: Enantiomeric excess was determined by HPLC with a Chiralcel IC-H column [ $\lambda = 214$  nm; eluent: hexane/isopropanol 50/50; flow rate: 0.7 mL/min;  $t_{\text{major}} = 19.80$  min,  $t_{\text{minor}} = 23.53$  min; ee = 96%;  $[\alpha]_{\text{D}}^{20} = +240.8$  (c 1.0,  $\text{CHCl}_3$ )].

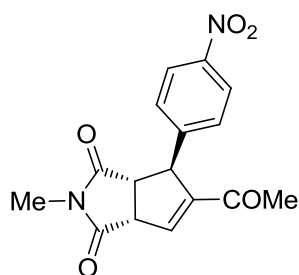

(3aS,6S,6aR)-5-acetyl-2-methyl-6-(4-nitrophenyl)-6,6a-dihydrocyclopenta[c]pyrrole-1,3(2H,3H)-dione (**3q**). Yield: 32 mg, >99%; colorless solid, mp 268–272 °C; IR ( $\text{CH}_2\text{Cl}_2$ ):  $\nu$  2957,

2927, 2858, 1780, 1701, 1668, 1596, 1514, 1433, 1347, 1280, 1124, 1058, 1011, 963, 851, 809, 756, 740, 705, 640  $\text{cm}^{-1}$ ;  $^1\text{H}$  NMR (400 MHz,  $\text{CDCl}_3$ , TMS):  $\delta$  2.32 (3H, s,  $\text{CH}_3$ ), 3.03 (3H, s,  $\text{CH}_3$ ) 3.33 (1H, dd,  $J = 2.0, 7.2$  Hz, CH), 4.28–4.31 (1H, m, CH), 4.65–4.68 (1H, m, CH), 6.89 (1H, dd,  $J = 1.2, 2.0$  Hz, CH), 7.36 (2H, d,  $J = 8.4$  Hz, ArH), 8.18 (2H, d,  $J = 8.4$  Hz, ArH);  $^{13}\text{C}$  NMR (100 MHz,  $\text{CDCl}_3$ , TMS):  $\delta$  25.3, 27.2, 51.7, 52.3, 53.5, 124.2, 127.9, 138.3, 147.1, 148.3, 149.1, 174.8, 177.1, 194.1; MS (ESI)  $m/z$  (%): 315.0 (100) [ $\text{M}^+ + 1$ ]; HRMS (ESI) Calcd. for  $\text{C}_{16}\text{H}_{14}\text{N}_2\text{NaO}_5$  ( $\text{M}^+ + \text{Na}$ ) requires 337.0795, found: 337.0793; Enantiomeric excess was determined by HPLC with a Chiralcel PA-2 column [ $\lambda = 214$  nm; eluent: hexane/isopropanol 50/50; flow rate: 0.7 mL/min;  $t_{\text{major}} = 47.66$  min,  $t_{\text{minor}} = 70.64$  min; ee = 97%;  $[\alpha]_{\text{D}}^{20} = +389.8$  ( $c$  1.0,  $\text{CHCl}_3$ )].

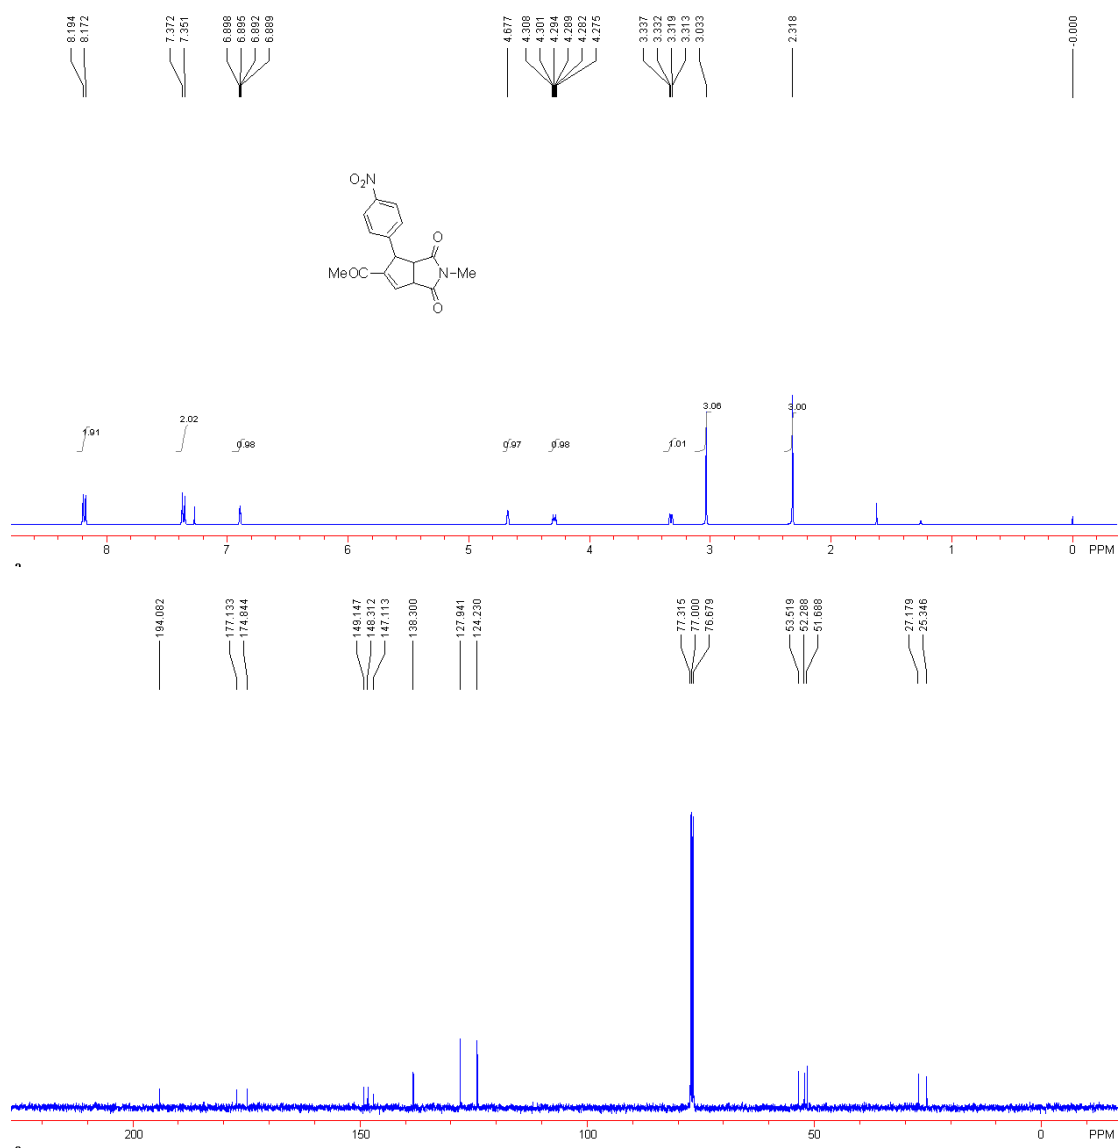

实验时间: 2012-01-14, 12:07:09

谱图文件: E:\实验数据\HPLC\dhp\19-70-sub1-PA-2-50-50-0.7-214-rac-re.org

实验者:

报告时间: 2012-01-16, 15:44:44

积分方法: 面积归一法

使用仪器类型: 气相色谱

检测器: FID

进样器: 分流

柱温: 程序升温

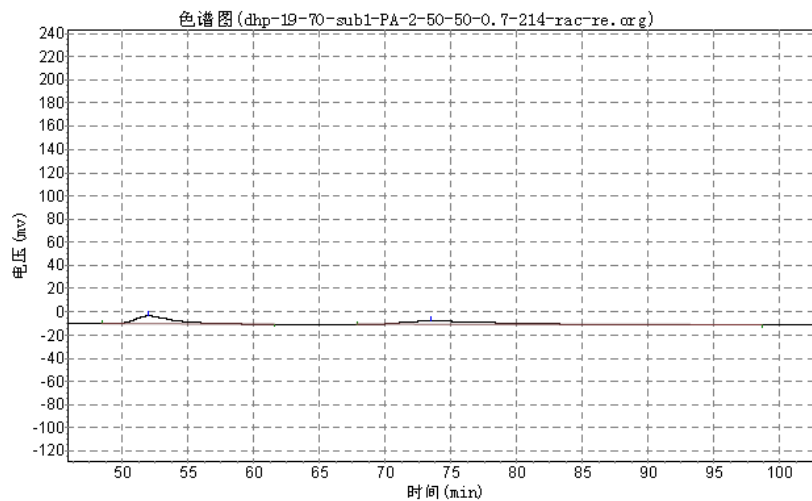

分析结果表

| 峰号 | 峰名 | 保留时间   | 峰高       | 峰面积         | 含量       |
|----|----|--------|----------|-------------|----------|
| 1  |    | 51.985 | 6634.631 | 1377864.750 | 49.0344  |
| 2  |    | 73.472 | 2890.285 | 1432131.500 | 50.9656  |
| 总计 |    |        | 9524.916 | 2809996.250 | 100.0000 |

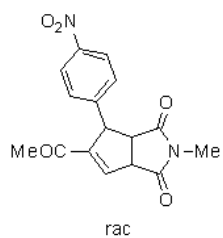

PA-2, 214 nm  
Hexane: iPrOH = 50:50  
0.7 mL/min

实验时间: 2012-01-14, 14:28:13

谱图文件: E:\实验数据\HPLC\dhp\19-70-sub1-PA-2-50-50-0.7-214-asy.org

实验者:

报告时间: 2012-01-16, 15:40:53

积分方法: 面积归一法

使用仪器类型: 气相色谱

检测器: FID

进样器: 分流

柱温: 程序升温

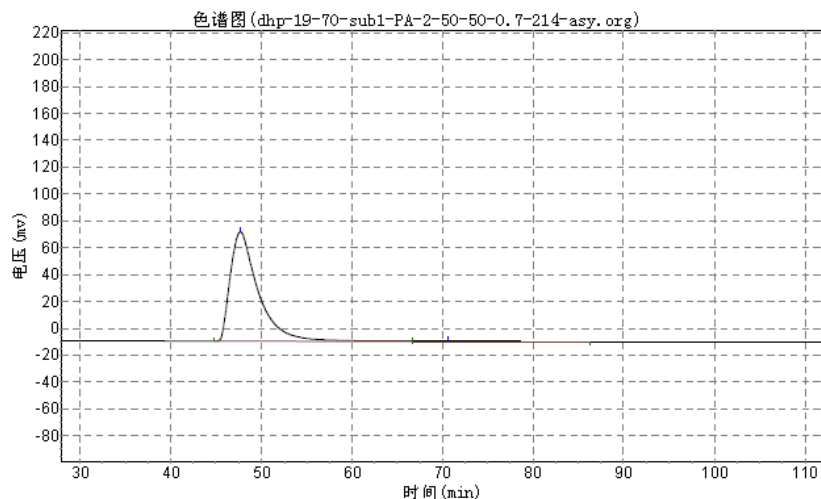

分析结果表

| 峰号 | 峰名 | 保留时间   | 峰高        | 峰面积          | 含量       |
|----|----|--------|-----------|--------------|----------|
| 1  |    | 47.662 | 81543.414 | 17458990.000 | 98.3125  |
| 2  |    | 70.643 | 676.247   | 299673.844   | 1.6875   |
| 总计 |    |        | 82219.661 | 17758663.844 | 100.0000 |

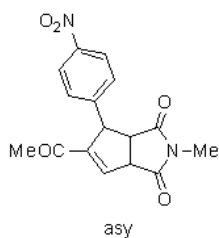

PA-2, 214 nm  
Hexane: iPrOH = 50:50  
0.7 mL/min

Chiral HPLC report: Enantiomeric excess was determined by HPLC with a Chiralcel PA-2 column [ $\lambda = 214$  nm; eluent: hexane/isopropanol 50/50; flow rate: 0.7 mL/min;  $t_{\text{major}} = 47.66$  min,  $t_{\text{minor}} = 70.64$  min; ee = 97%;  $[\alpha]_{\text{D}}^{20} = +389.8$  (c 1.0,  $\text{CHCl}_3$ )].

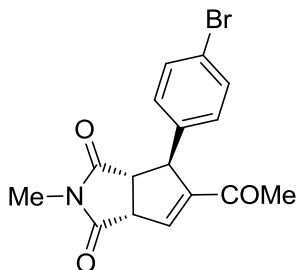

**(3a*S*,6*S*,6a*R*)-5-acetyl-6-(4-bromophenyl)-2-methyl-6,6a-dihydrocyclopenta[*c*]pyrrole-1,3(2*H*,3a*H*)-dione (3o).** Yield: 32 mg, 92%; colorless solid, mp 185–189 °C; IR (CH<sub>2</sub>Cl<sub>2</sub>):  $\nu$  3072, 2950, 2926, 1780, 1701, 1677, 1616, 1487, 1432, 1380, 1282, 1127, 1072, 1010, 962, 893, 825, 744 cm<sup>-1</sup>; <sup>1</sup>H NMR (400 MHz, CDCl<sub>3</sub>, TMS):  $\delta$  2.28 (3H, s, CH<sub>3</sub>), 3.01 (3H, s, CH<sub>3</sub>) 3.29 (1H, dd, *J* = 1.6, 7.2 Hz, CH), 4.20–4.23 (1H, m, CH), 4.53–4.56 (1H, m, CH), 6.89 (1H, dd, *J* = 1.6, 2.8 Hz, CH), 7.06 (2H, d, *J* = 8.4 Hz, ArH), 7.44 (2H, d, *J* = 8.4 Hz, ArH); <sup>13</sup>C NMR (100 MHz, CDCl<sub>3</sub>, TMS):  $\delta$  25.2, 27.3, 52.0, 52.1, 53.4, 121.2, 128.6, 132.0, 137.4, 140.8, 148.7, 175.3, 177.5, 194.3; MS (ESI) *m/z* (%): 348.0 (100) [*M*<sup>+</sup> + 1]; HRMS (ESI) Calcd. for C<sub>16</sub>H<sub>14</sub>BrNNaO<sub>3</sub> (*M*<sup>+</sup> + Na) requires 370.0049, found: 370.0037; Enantiomeric excess was determined by HPLC with a Chiralcel PA-2 column [ $\lambda$  = 214 nm; eluent: hexane/isopropanol 50/50; flow rate: 0.7 mL/min; *t*<sub>major</sub> = 17.12 min, *t*<sub>minor</sub> = 24.92 min; ee = 98%; [ $\alpha$ ]<sub>D</sub><sup>20</sup> = +360.6 (*c* 1.0, CHCl<sub>3</sub>)].

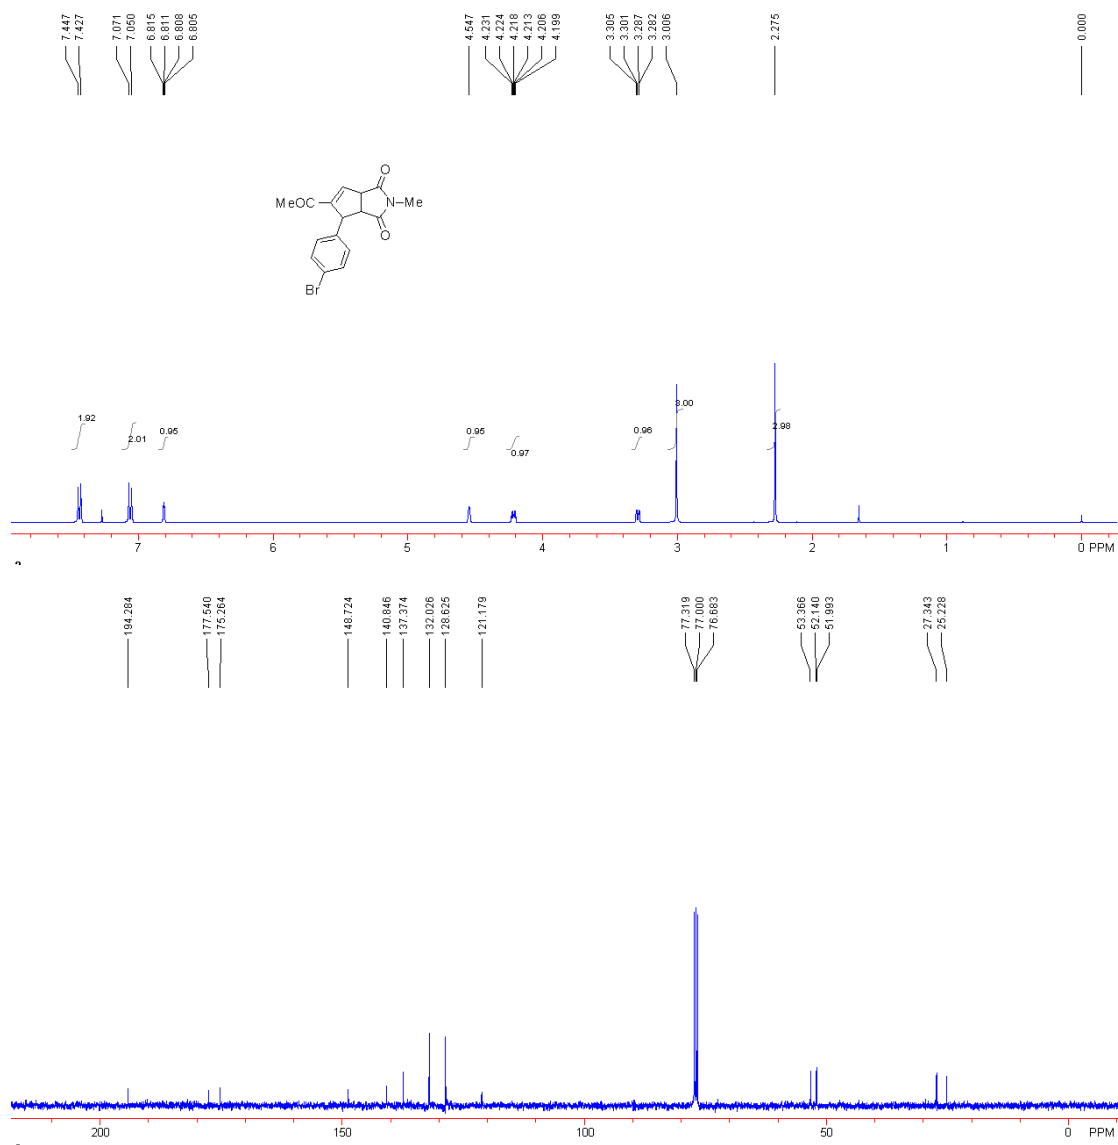

# HPLC Report

Sample Name:

Data File:Dhp-19-70-sub2-rac PA-2 55 214 0.7. che

Operator:

Date:2012-01-13

Time:15:35

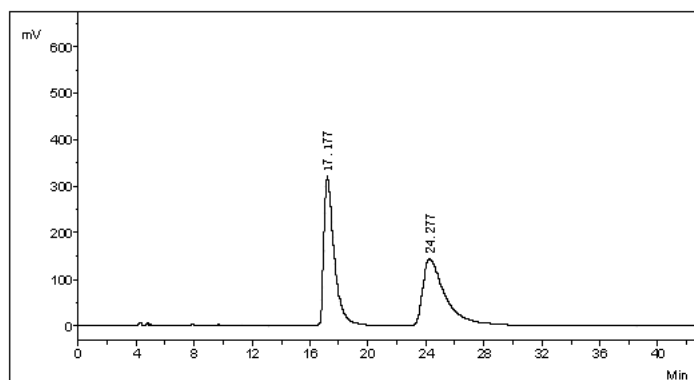

| No.   | PeakNo | ID. Name | R. Time | PeakHeight | PeakArea   | PerCent  |
|-------|--------|----------|---------|------------|------------|----------|
| 1     | 1      |          | 17.177  | 320400.0   | 16081475.9 | 50.8485  |
| 2     | 2      |          | 24.277  | 143764.6   | 15544750.1 | 49.1515  |
| Total |        |          |         | 464164.6   | 31626226.0 | 100.0000 |

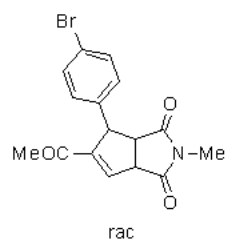

PA-2, 214 nm  
Hexane:PrOH = 50:50  
0.7 mL/min

## HPLC Report

Sample Name: Data File:Dhp-19-70-sub2-asy PA-2 55 214 0.7.che  
 Operator: Date:2012-01-13  
 Time:16:20

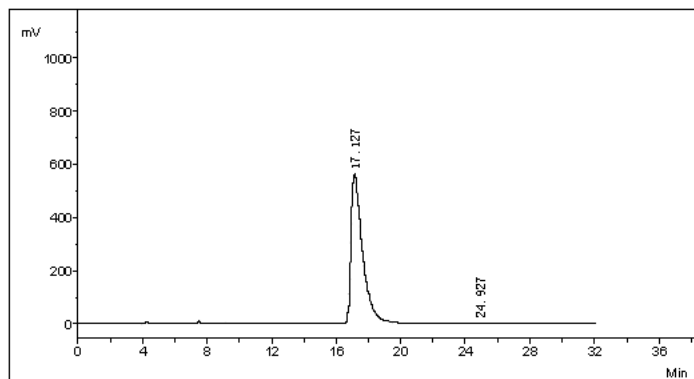

| No.   | PeakNo | ID. Name | R. Time | PeakHeight | PeakArea   | PerCent  |
|-------|--------|----------|---------|------------|------------|----------|
| 1     | 1      |          | 17.127  | 562022.2   | 28294438.9 | 99.1938  |
| 2     | 2      |          | 24.927  | 2200.4     | 229976.4   | 0.8062   |
| Total |        |          |         | 564222.6   | 28524415.3 | 100.0000 |

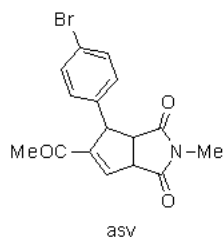

PA-2, 214 nm  
 Hexane:PrOH = 50:50  
 0.7 mL/min

Chiral HPLC report: Enantiomeric excess was determined by HPLC with a Chiralcel PA-2 column [ $\lambda = 214$  nm; eluent: hexane/isopropanol 50/50; flow rate: 0.7 mL/min;  $t_{\text{major}} = 17.12$  min,  $t_{\text{minor}} = 24.92$  min; ee = 98%;  $[\alpha]_{\text{D}}^{20} = +360.6$  ( $c$  1.0,  $\text{CHCl}_3$ )].

### 2. General procedure for the dihydroxylation of **4c** [2,3].

*General Procedure:*  $\text{NaIO}_4$  (0.16 mmol, 34 mg, 2 equiv) and distilled water (0.1 mL) were added to a flask. After the  $\text{NaIO}_4$  had been dissolved, the solution was cooled to 0 °C, and two drops of  $\text{H}_2\text{SO}_4$  aqueous (2 M) was added and stirred for 5 min. Then  $\text{RuCl}_3 \cdot 3\text{H}_2\text{O}$  (0.008 mmol, 3.0 mg, 0.1 equiv) was added, followed by two drops of  $\text{H}_2\text{SO}_4$  aqueous (2 M). The resulting solution was stirred for 5 min, and then EtOAc (0.2 mL) was added. After the solution had been stirred for 5 min,  $\text{CH}_3\text{CN}$  (0.3 mL) was added. The solution was stirred for 5 min, and then a solution of substrate **3c** (0.08 mmol,



34 mg) in EtOAc (0.3 mL) was added. The solution was further stirred for 10 min, and then 10% NaHCO<sub>3</sub> (0.7 mL) and saturated Na<sub>2</sub>SO<sub>3</sub> solution (2.5 mL) were added. After the solution had been stirred for 30 min at room temperature, it was extracted with EtOAc (3 × 5 mL). The combined organic extracts were dried over anhydrous Na<sub>2</sub>SO<sub>4</sub>, filtered, and the solvent was removed under reduced pressure and residue was chromatographed on silica gel (elution with petroleum ether/EtOAc 2:1) to provide compound **4c**.

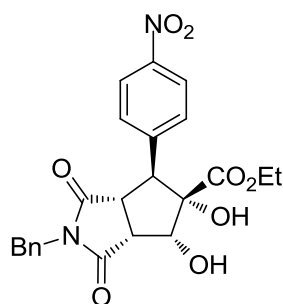

**(3aR,4R,5S,6S,6aR)-ethyl 2-benzyl-4,5-dihydroxy-6-(4-nitrophenyl)-1,3-dioxooctahydrocyclopenta[c]pyrrole-5-carboxylate (4c).** Yield: 25 mg, 69%; yellow oil; IR (CH<sub>2</sub>Cl<sub>2</sub>):  $\nu$  2961, 2925, 2854, 1699, 1519, 1399, 1347, 1259, 1089, 1017, 796, 699 cm<sup>-1</sup>; <sup>1</sup>H NMR (400 MHz, CDCl<sub>3</sub>, TMS):  $\delta$  1.00 (3H, t,  $J$  = 7.2 Hz, CH<sub>3</sub>), 3.32 (1H, d,  $J$  = 3.6 Hz, OH), 3.66–3.76 (2H, m, CH+CH), 3.82 (1H, s, OH), 3.88 (1H, d,  $J$  = 5.6 Hz, CH), 3.92–4.08 (2H, m, CH<sub>2</sub>), 4.59 (1H, dd,  $J$  = 3.6, 5.6 Hz, CH), 4.63–4.74 (2H, m, CH<sub>2</sub>), 7.28–7.41 (5H, m, ArH), 7.48–7.51 (2H, m, ArH), 8.18–8.20 (2H, m, ArH); <sup>13</sup>C NMR (100 MHz, CDCl<sub>3</sub>, TMS):  $\delta$  13.8, 42.8, 46.8, 47.6, 52.9, 62.9, 74.7, 87.3, 123.7, 127.9, 128.5, 128.58, 128.64, 135.2, 144.3, 147.3, 170.7, 175.0, 177.3; MS (MADLI)  $m/z$  (%): 477.4 (38.0) [M<sup>+</sup> + Na]; HRMS (MADLI) Calcd. for C<sub>23</sub>H<sub>23</sub>N<sub>2</sub>O<sub>8</sub> (M<sup>+</sup> + 1) requires 455.1449, found: 455.1457;  $[\alpha]_D^{20}$  = +73.3 ( $c$  1.0, CHCl<sub>3</sub>).

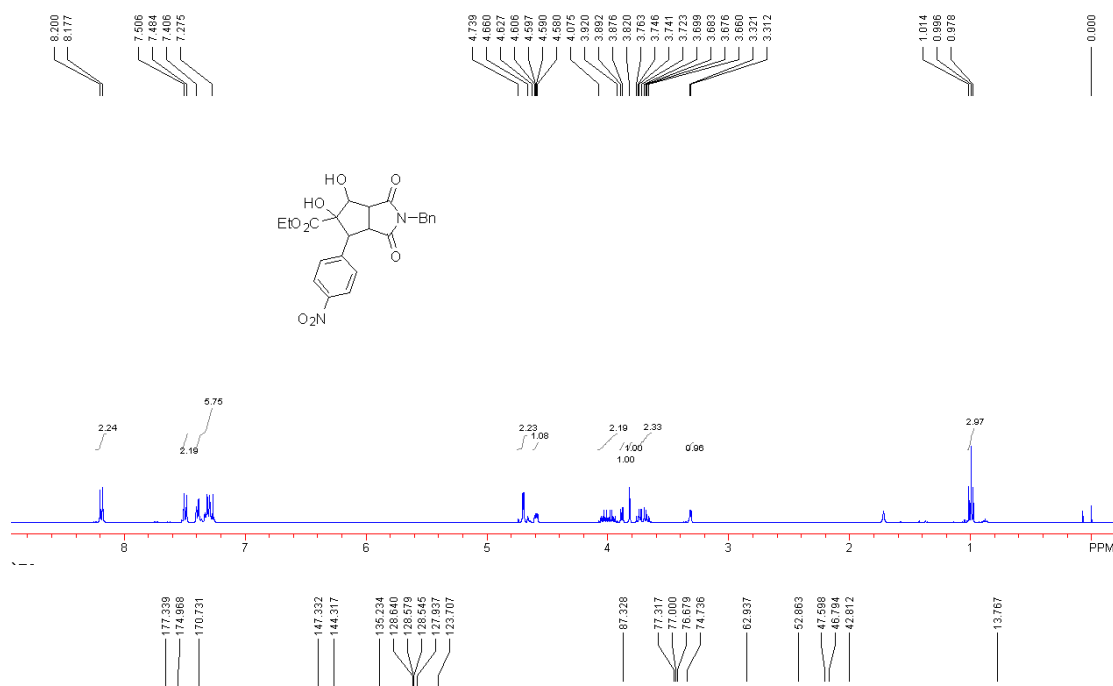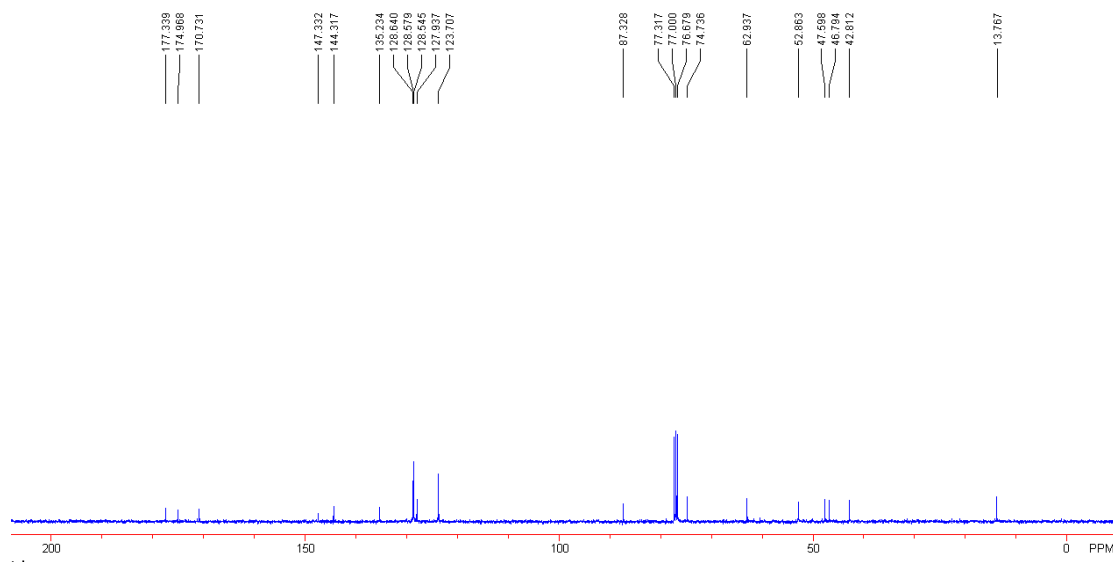

<sup>1</sup>H NMR (400 MHz) spectroscopy of **4c** after adding D<sub>2</sub>O into the NMR tube.

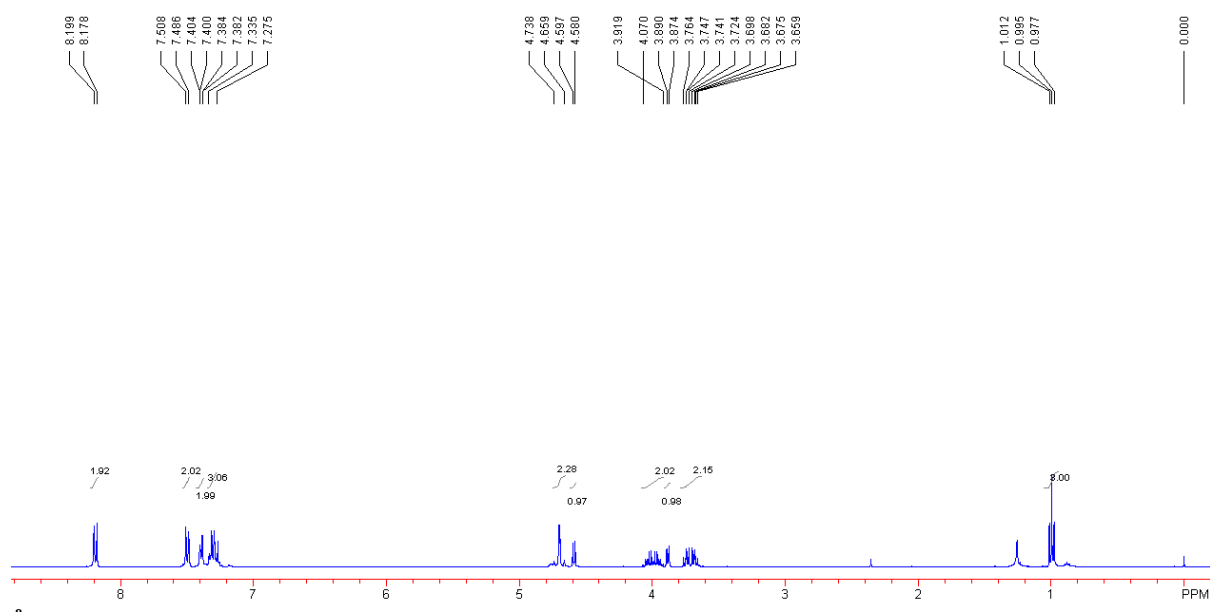

# NOESY (Varian Mercury-300 MHz)

exp8 NOESY

| SAMPLE         |              | FLAGS         |            |      |
|----------------|--------------|---------------|------------|------|
| date           | Feb 7 2012   | hs            |            | n    |
| solvent        | CDCl3        | sspu1         |            | y    |
| sample         | dhp-19-76-r~ | PFGflg        |            | y    |
|                | 8 07Feb2012  | hsglvt        |            | 1043 |
| ACQUISITION    |              | SPECIAL       |            |      |
| sw             | 4807.7       | temp          | not used   |      |
| at             | 0.213        | gain          | 26         |      |
| np             | 2048         | spin          | 0          |      |
| fb             | not used     | f2            | PROCESSING |      |
| ss             | 32           | lb            | 3.00       |      |
| dl             | 2.000        | gf            | 0.080      |      |
| nt             | 32           | gfs           | not used   |      |
|                |              | fn            | 2048       |      |
| 2D ACQUISITION |              | F1 PROCESSING |            |      |
| sw1            | 4807.7       | gf1           | 0.025      |      |
| nl             | 128          | gf51          | not used   |      |
| tn             | H1           | proc1         | 1p         |      |
| sfrq           | 300.029      | fn1           | 2048       |      |
| tof            | 264.0        |               |            |      |
| tpwr           | 60           | sp            | -282.3     |      |
| pw             | 8.400        | wp            | 2976.6     |      |
|                | NOESY        | sp1           | -294.0     |      |
| mix            | 0.800        | wp1           | 2990.7     |      |
| PRESATURATION  | nnnn         | rf1           | 691.5      |      |
| satpwr         | 0            | rf11          | 599.2      |      |
| satdly         | 0            | rfp1          | 0          |      |
| satfrq         | 0            |               |            |      |
| DECOUPLER      |              | PLOT          |            |      |
| dn             | C13          | wc            | 155.0      |      |
| dm             | nnn          | sc            | 10.0       |      |
|                |              | wc2           | 155.0      |      |
|                |              | sc2           | 0          |      |
|                |              | vs            | 379        |      |
|                |              | th            | 2          |      |
|                |              | al            | ph         |      |

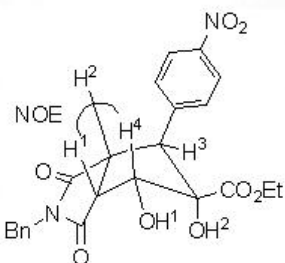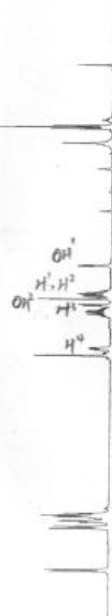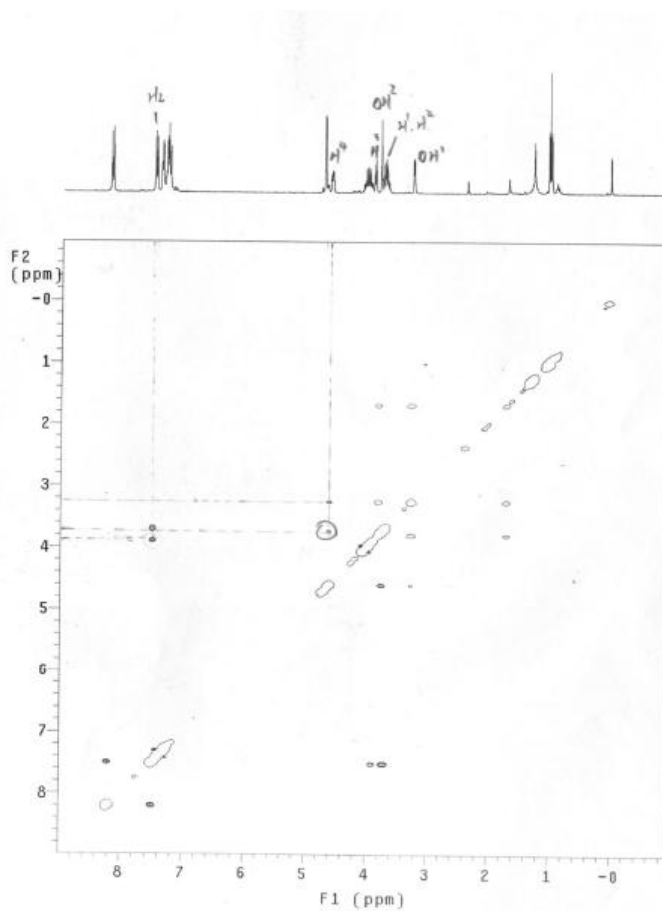

NOESY spectra of **4c** after adding D<sub>2</sub>O into the NMR tube

exp8 NOESY

```

SAMPLE          FLAGS
date    Feb 13 2012    h8      n
solvent  CDC13         sspul    y
sample   denghp-19-7~  PFGflg   y
6-D2O    13Feb2012    hsglv1  1043
ACQUISITION          SPECIAL 1043
sw  4807.7    temp    not used
at  0.213    gain     22
np  2048     spin     0
fb  not used  F2 PROCESSING
ss  32       lb       3.00
d1  2.000    gf       0.071
nt  32       gfs     not used
2D ACQUISITION      fn  2048
sw1 4807.7    F1 PROCESSING
nl  128       gf1     0.025
TRANSMITTER          gfs1    not used
tn  H1        procl    lp
sfrq 300.025  fn1     2048
tof  264.0
tpwr 60       sp       -299.9
pw  8.400     wp       2986.0
mix  NOESY    sp1      -292.9
PRESATURATION        wp1     3004.5
satpwr 0       rfp      598.0
satdy  0       rf1      0
satfrq 0       rfp1     0
DECOUPLER            wc      155.0
dn  C13        sc       10.0
dn  nm         sc2      155.0
vs  680
th  0
al  ph
PLOT

```

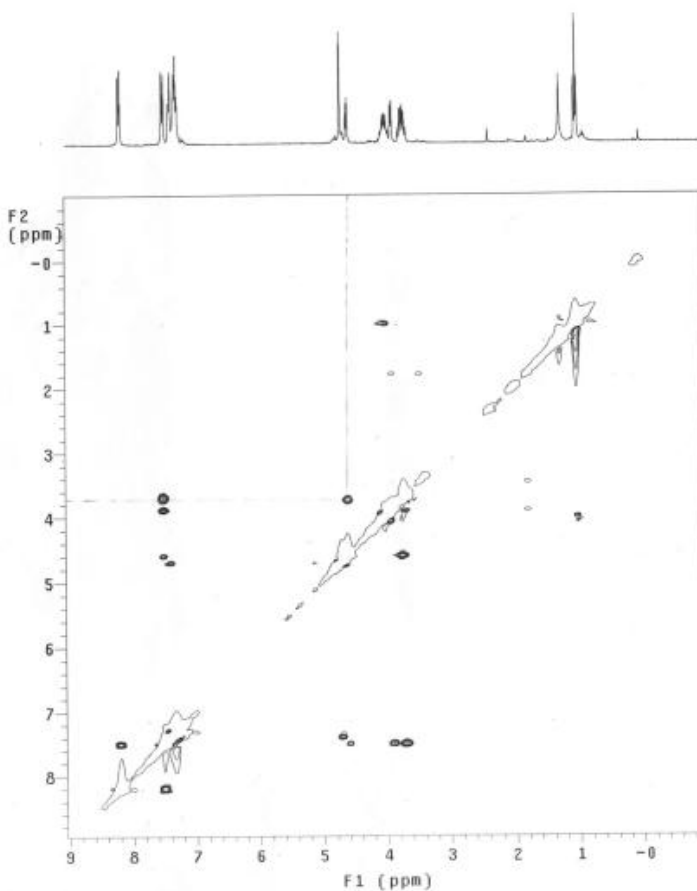

### 3. $^{31}\text{P}$ NMR Spectroscopy of the control experiments

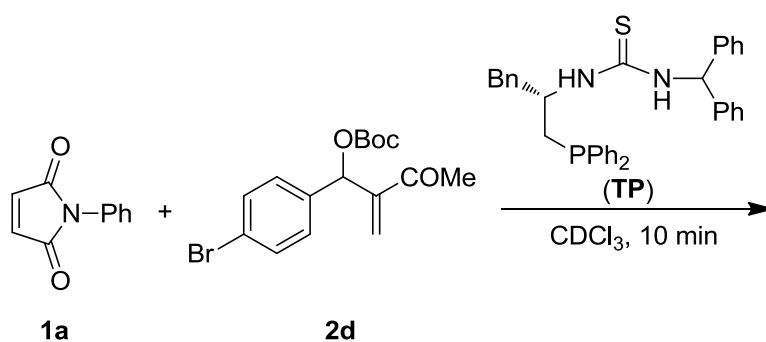

- TP (0.05 mmol)
- 1a** (0.05 mmol) and TP (0.05 mmol)
- 2d** (0.05 mmol) and TP (0.05 mmol)
- 1a** (0.05 mmol), **2d** (0.05 mmol) and TP (0.05 mmol)

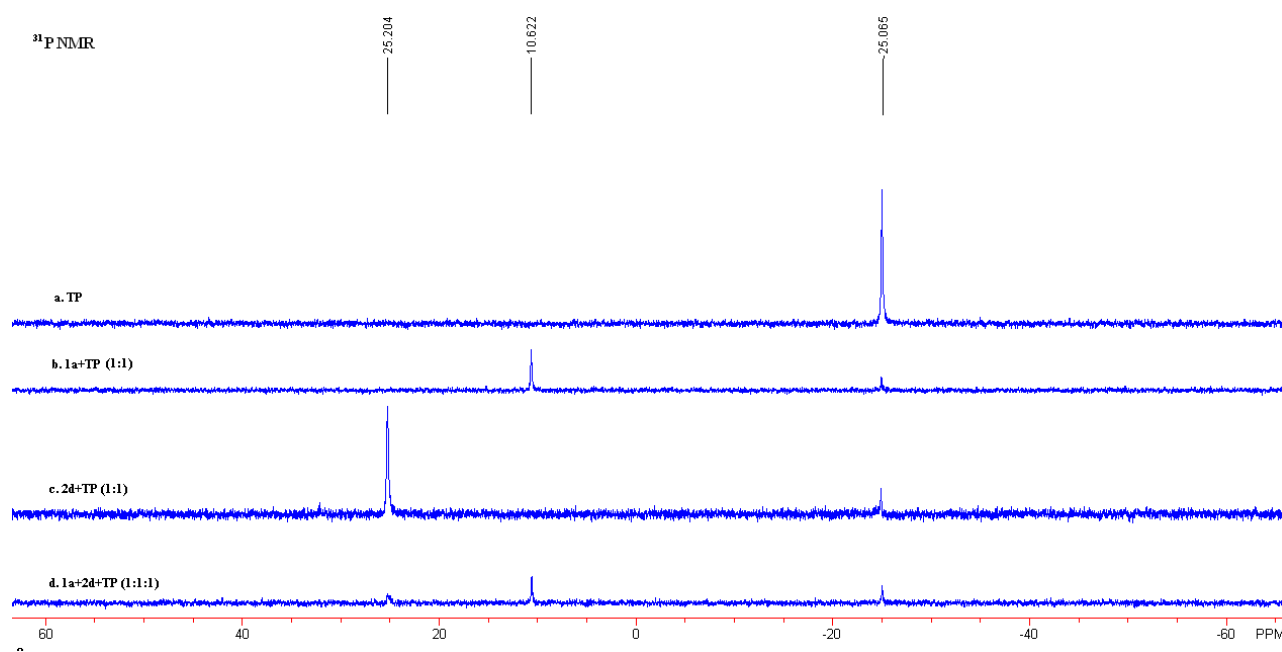

**Figure SI-1.**  $^{31}\text{P}$  NMR Spectra (161.9 MHz,  $\text{CDCl}_3$ ) of control experiments

#### 4. References:

1. Deng, H.-P.; Wei, Y.; Shi, M. *Adv. Synth. Catal.* **2012**, 354, 783–789.
2. Plietker, B.; Niggemann, M. *Org. Lett.* **2003**, 5, 3353–3356.
3. Wurz, R. P.; Fu, G. C. *J. Am. Chem. Soc.* **2005**, 127, 12234–12235.
