# Supplementary material for: Chiral multifunctional thiourea-phosphine catalyzed asymmetric [3 + 2] annulation of Morita–Baylis–Hillman carbonates with maleimides
Source: publisher site journal article supplement (doi:10.3762/bjoc.8.121), 2012-07-16
Supplement: Additional file 2 [file 1860-5397-8-121-S2.pdf]

# Supporting Information

for

## **Chiral multifunctional thiourea-phosphine catalyzed asymmetric [3 + 2] annulation of Morita–Baylis–Hillman carbonates with maleimides**

Hong-Ping Deng<sup>1</sup>, De Wang<sup>2</sup>, Yin Wei<sup>1</sup> and Min Shi\*<sup>1,2,§</sup>

Address: <sup>1</sup>State Key Laboratory of Organometallic Chemistry, Shanghai Institute of Organic Chemistry, Chinese Academy of Sciences, 354 Fenglin Road, Shanghai 200032, People's Republic of China and <sup>2</sup>Key Laboratory for Advanced Materials and Institute of Fine Chemicals, School of Chemistry & Molecular Engineering, East China University of Science and Technology, and 130 MeiLong Road, Shanghai 200237, People's Republic of China

Email: Min Shi - [Mshi@mail.sioc.ac.cn](mailto:Mshi@mail.sioc.ac.cn)

<sup>§</sup>Fax: 86-21-64166128

\*Corresponding author

### **Crystal structure data of compound 3r**

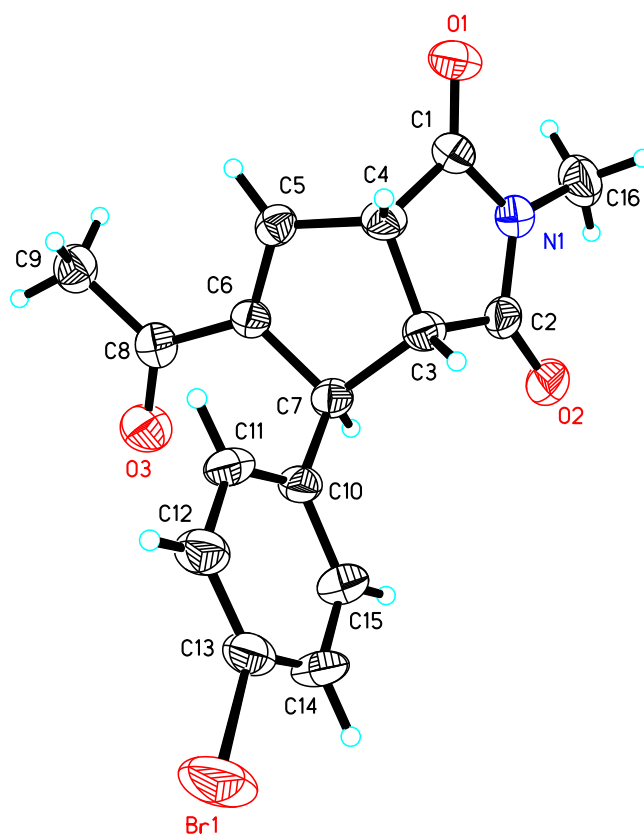

The crystal data of **3r** have been deposited in CCDC with number 863228. Empirical Formula:  $C_{16}H_{14}BrNO_3$ ; Formula Weight: 348.19; Crystal Color, Habit: colorless, Crystal Dimensions:  $0.211 \times 0.157 \times 0.104$  mm; Crystal System: Orthorhombic; Lattice Parameters:  $a = 9.5280(6)\text{\AA}$ ,  $b = 9.6271(6)\text{\AA}$ ,  $c = 16.3779(10)\text{\AA}$ ,  $\alpha = 90^\circ$ ,  $\beta = 90^\circ$ ,  $\gamma = 90^\circ$ ,  $V = 1502.30(16)\text{\AA}^3$ ; Space group:  $P2(1)2(1)2(1)$ ;  $Z = 4$ ;  $D_{calc} = 1.539\text{ g/cm}^3$ ;  $F_{000} = 704$ ; Final R indices [ $I > 2\sigma(I)$ ]:  $R1 = 0.0384$ ;  $wR2 = 0.0900$ .
